# Supplementary material
Source: PubMed Central journal article supplement (PMC3201818)
Supplement: NIHMS320791-supplement-supp_app.pdf [file NIHMS320791-supplement-supp_app.pdf]

## Supplementary Appendix

This appendix has been provided by the authors to give readers additional information about their work.

Supplement to: Ley TJ, Ding L, Walter MJ, et al. *DNMT3A* mutations in acute myeloid leukemia. *N Engl J Med* 2010;363:2424-33. DOI: 10.1056/NEJMoa1005143.

(PDF last updated December 16, 2010.)

## Supplementary Appendix

### A. Supplementary Methods

#### **Whole Genome Sequencing and mutation validation.**

Whole genome sequencing (with paired end reads) and analysis was performed exactly as described.<sup>1</sup> Validation of putative somatic SNVs and indels with Sanger sequencing was performed as described.<sup>1</sup>

#### **Measuring expression levels of identified somatic mutations using RT-PCR followed by 454 readcounts.**

Deep readcounts of variant alleles in cDNA obtained from primary AML bone marrow samples was performed exactly as described.<sup>1</sup>

#### **RNA expression arrays and analysis.**

Specimen RNA was extracted, assayed for quality, and subjected to Affymetrix Human Genome U133 Plus 2.0 Array GeneChip microarrays (Affymetrix) as described.<sup>2</sup> Profiling data for all specimens have been deposited on the Gene Expression Omnibus (GEO; <http://www.ncbi.nlm.nih.gov/geo/>; accession no. GSE12662). Cel files were processed using the MAS5 algorithm (Affymetrix) and only probesets called "present" in at least 75% of specimens in either *DNMT3A* mutated or wild type groups were retained. These filtered probesets were z-scored and Ward's unsupervised hierarchical clustering was performed (Spotfire DecisionSite 8.2 software, TIBCO).

#### **Measuring 5-methylcytosine content by mass spectrometry.**

*Reagents and calibration solutions.* Deoxyribonucleoside compounds were purchased from USB Corporation (Cleveland, OH) (5-methyl-2'-deoxycytidine monophosphate disodium salt (mdCMP), 2'-deoxyguanosine-5'-monophosphate disodium salt (dGMP), 2'-deoxyadenosine-5'-monophosphate free acid (dAMP)) or from Sigma Aldrich (2'-deoxycytidine monophosphate sodium salt (dCMP), thymidine (T), 2'-deoxyadenosine monohydrate (dA), 2'-deoxycytidine (dC), thymidine 5'-monophosphate disodium salt hydrate (TMP)). Water (LC-MS Chromasolv) and formic acid (1.00 mL ampoules, Puriss) were purchased from Fluka. Methanol (HPLC grade) was purchased from Fisher Scientific. The reference nucleosides and nucleoside monophosphates were weighed on an analytical balance and then dissolved in 1.00 mL of 5% methanol/0.1% formic acid. The concentrations of stock solutions accounted for the organic purity and water content as supplied by the manufacturer. The resulting stock solutions were used to prepare a 50 pmol/ $\mu$ L working stock solution, from which was prepared analytical solutions of 0.0050, 0.010, 0.050, 0.10, 0.50, 1.0, and 5.0 fmol/ $\mu$ L.

*LC-ESI-MS/MS.* Liquid chromatography-tandem mass spectrometry (LC-MS/MS) analyses were performed using a Shimadzu SCL-10A VP HPLC system (Columbia, MD) which was interfaced with a 4000 Q-Trap (MS/MS) mass

spectrometer (Applied Biosystems, Foster City, CA). Instrument operation and data acquisition were controlled with the Analyst software package (Version 1.4.2, Applied Biosystems). The HPLC system consisted of an autosampler, a binary pump, and a degasser. Chromatography and optimization of mass spectrometer source and MRM parameters was performed as previously described.<sup>3</sup> Samples were analyzed at a flow rate of 0.22 ml/min on an Atlantis dC18 column (2.1 x 150 mm, 5 $\mu$ , Waters Corporation). Mobile phases were 0.1% formic acid (A) and 0.1% formic acid/100% methanol (B). Compounds of interest were eluted using the following gradient: linear gradient from 0% B to 12.5% B (0 to 15 min), linear gradient from 12.5% B to 80% B (15 to 17 min), 80% B (17 to 18 min), linear gradient from 100% B to 0% B (18 to 18.5 min), and 0% B (16 min. and after). Total run time was 25 min. Injection volume was 20  $\mu$ l. All MS/MS analyses were performed in positive ion mode by electrospray ionization (ESI) using a Turbo IonSpray source. Curtain, nebulizer, turbo, and collisionally-activated dissociation gases were 30 psig, 25 psig, 30 psig, 4 psig, respectively. Turbo heater temperature was 500  $^{\circ}$ C, and ion spray voltage was 5500 V. Dwell time for each MRM transition was 100 msec; total duty cycle time was 0.945 sec.

*Preparation of DNA samples.* Total genomic DNA was hydrolyzed exactly as described.<sup>4</sup> From a test sample with a DNA concentration of  $\sim$  35 ng/ $\mu$ L, tenfold dilutions gave signal responses within the working quantification range (0.1-100 fmols on column). After DNA hydrolysis, each of the test samples had a theoretical concentration of approximately 10 ng/ $\mu$ L DNA. Based on these initial estimates, the samples were analyzed after a three-fold dilution of the DNA hydrolysates. Several of the samples required repeat analysis with a five-fold dilution of the hydrolysate. Standard curves were prepared for each set of analyses on the same day. An injection volume of 20  $\mu$ L was used, resulting in on-column amounts of 0.10, 0.20, 1.0, 2.0, 10.0, 20.0, and 100.0 fmols for each nucleoside or nucleoside monophosphate compound. Peak areas and the corresponding molar amount of analyte were determined using Analyst software, and the resulting values were exported to an Excel spreadsheet for calculation of methylation ratios using two methods. The percentage methylation was calculated by dividing the measured level of mdCMP<sup>3</sup> by the measured level of dGMP<sup>3</sup> or by using the sum of mdCMP and dCMP.<sup>5</sup>

#### **MeDIP-chip assays and analysis.**

Genomic DNA from the bone marrow of five AML samples without the R882H mutation and five AML samples with the mutation were prepared for methylated DNA immunoprecipitation (MeDIP) exactly as described ([http://app.roche-biochem.jp/pdf/products/microarray/trust\\_srv/DNA\\_Methylation\\_Sample\\_Prep\\_v4p1.pdf](http://app.roche-biochem.jp/pdf/products/microarray/trust_srv/DNA_Methylation_Sample_Prep_v4p1.pdf)).

Comparative hybridization was performed on NimbleGen Human DNA Methylation 2.1M Deluxe Pro Arrays, which contain targets for all annotated CpG islands and most gene and miRNA promoters, using established protocols ([http://www.nimblegen.com/products/lit/methylation\\_userguide\\_v7p1.pdf](http://www.nimblegen.com/products/lit/methylation_userguide_v7p1.pdf)). The

log ratios of the probe intensities were scaled around zero by subtracting the biweight mean of all values from each log-ratio. The resulting 2.1M log ratios for ten samples were made available in GFF file format for data analysis.

The top 2,000 differentially methylated probes among the 10 samples based on mean absolute deviation were selected, and both Pearson-Ward clustering and k-means clustering were performed (k=2). The samples that did not cluster in the appropriate groups were the M5 AML subtype UPN# 737451 with the R882H mutation, and the M4 AML subtype UPN# 418499 without the mutation.

The following method was developed to identify regions with significant difference in methylation between AML samples with or without the R882H mutation in *DNMT3A*.

1. The following criteria were applied to select probes among the 2.1M for the statistical test.
  - The mean  $\log_2$ -ratio (signal intensity of immunoprecipitated sample/signal intensity of non-immunoprecipitated sample) for 5 *DNMT3A* mutant samples vs. the mean  $\log_2$ -ratio of 5 *DNMT3A* wild type samples were different by a value of 1 or more
  - At least 4 out of 5 *DNMT3A* mutant  $\log_2$ -ratios  $\geq 1$ , or at least 4 out of 5 *DNMT3A* wild type  $\log_2$ -ratios  $\geq 1$ . This allows for the two outliers detected during unsupervised clustering.
2. For all probes selected, we calculated the mean of  $\log_2$ -ratios for both groups using 5 consecutive probes, which include the current probe and two on either side.
3. We performed a paired t-test between the 5 *DNMT3A* mutant means and 5 *DNMT3A* wild type means, calculated above. If the resulting p-value is  $\leq 0.05$ , we considered this probe as differentially methylated.
4. We clustered the differentially methylated probes identified above if they were 220bp or closer to each other. This resulted in 1,214 clusters. Among them, 423 clusters contained 2 or more differentially methylated probes and 182 clusters contained 3 or more differentially methylated probes.

### **Statistical analysis of survival by risk group.**

Mean differences between patients with and without the *DNMT3A* mutation were compared with two-sided independent-sample t-tests. Differences in distribution of the highly skewed WBC measurements were compared with a Wilcoxon rank-sum tests. Differences in the distribution of nominal variables between those with or without the *DNMT3A* mutation were compared with Fisher's Exact tests or Pearson chi-squared tests. Figures were generated with SAS PROC LIFETEST, which also calculated the log-rank and Wilcoxon test statistics comparing survival between the two *DNMT3A*-mutation groups. Multivariate Cox proportional-hazards analyses<sup>6</sup> were performed with SAS PROC PHREG. Variables evaluated as potential confounders in the proportional hazards model were *FLT3* mutation, *IDH1* mutation, *NPMc* mutation, male sex, white race, age, FAB

category of M3, normal cytogenetics, and cytogenetic risk group. The analyses were generated using SAS/STAT software (Version 9.2 of the SAS System for Windows, SAS Institute Inc., Cary, NC).

## **B. Supplementary Results and Discussion**

**Clinical AML treatment protocols.** Among the 188 patients treated at Washington University, 72 were treated with a standard seven day induction regimen of infusional cytarabine plus three days of an anthracycline (“7+3”), and 61 received a similar regimen that also included 3 days of etoposide (“7+3+3”). Twenty-four patients with acute promyelocytic leukemia (AML M3), were treated with 7+3 plus concurrent ATRA. Thirteen patients were treated with either azacytidine or decitabine. Nine patients were treated with lenalidomide. Two patients received an induction regimen of cladribine, mitoxantrone, and high-dose cytarabine (“CLAM”). Six patients received no chemotherapy (except hydroxyurea), and one patient was treated with infusional cytarabine alone. Seventy-nine patients subsequently underwent stem cell transplantation. Of these, 24 underwent autologous stem transplantation, of which 10 also underwent allogeneic transplant after relapsing. Fifty-five patients underwent allogeneic transplant (without prior autologous transplant). One of the allogeneic transplant only patients failed *DNMT3A* genotyping.

Among the 94 CALGB patients, fifty-eight patients were treated according to CALGB 9621, in which they were randomized to receive PSC833 vs placebo with concurrent infusional cytarabine, daunorubicin, and etoposide, followed by risk-adapted consolidation. Thirteen patients were treated with according to CALGB 9222, in which they received infusional cytarabine plus daunorubicin induction, followed by randomization to consolidation with high dose cytarabine, with or without cyclophosphamide and etoposide, or diaziquone and mitoxantrone. Thirteen patients with AML M3 were enrolled in CALGB 9191 and were randomized to induction therapy with ATRA vs cytarabine and daunorubicin. Fourteen AML M3 patients were enrolled in CALGB 9710 and were randomized to receive cytarabine, daunorubicin, and ATRA induction, with or without arsenic trioxide during consolidation. No patients in the CALGB group underwent stem cell transplantation.

### **Variant allele frequency of the *DNMT3A* mutation in sample 933124**

Using PCR, we amplified DNA containing the position of the frameshift mutation at L723, and performed “deep readcounts” to determine the variant allele frequency of this mutation in the de novo and relapse specimens. The variant allele frequency of this mutation was 38.86% (1819/4706 reads) in the de novo AML genome, and 29.75% (1600/5405 reads) at relapse. These data suggest that this mutation was present in most cells of the dominant clone at presentation (100% bone marrow blasts) and at relapse (78% blasts).<sup>7</sup>

### **5-Methylcytosine measurements in genomic DNA from AML samples**

The LC-ESI-MS/MS conditions were optimized by infusing a 10 ng/μL solution of each standard compound in 5% methanol/0.1% formic acid.<sup>3</sup> The reported transition pairs 288.2/112.2, 308.0/112.0, 322.0/126.1, 332.1/136.2, 252.1/135.9, 348.8/152.1, 323.0/81.0, and 243.3/127.2 were used for dC, dCMP, mdCMP, dAMP, dA, dGMP, TMP, and T, respectively.<sup>4</sup> The source parameters were optimized by infusing a solution of mdCMP (10 ng/μL in 5% methanol/0.1% formic acid) at 0.22 mL/min in order to minimize in-source fragmentation. Quantification was performed by injecting standard solutions of the standard mixture as described above in the Supplementary Methods. Under these conditions, all standard analytes gave linear curves with correlation coefficients greater than 0.99 in the range of 0.1 to 100 fmols injected. For five replicate standard curves, the coefficients of variation were 15-24% for mdCMP, 18-29% for dCMP, and 15-25% for dGMP.

The LC-MS-MS analysis for patient samples was performed using 3.5-5 ng/μL of DNA hydrolysis products. The percentage of methylation was determined by either dividing the measured amount of mdCMP (in fmols) by the amount of dGMP in each sample or by dividing the sum of mdCMP and dCMP detected in each sample. The quantity of dGMP was used based on the assumption that  $dGMP = dCMP + mdCMP$ .<sup>3</sup> For a control sample containing approximately 5% mdCMP, the average percentage of mdCMP was determined to be 4.2 +/- 0.1%, with a coefficient of variation of 3.5%, for four replicate measurements. The percentages of mdCMP in the control and patient samples are summarized in **Supplementary Table 5**. Both calculation methods gave approximately the same values of 5-methyl deoxycytidine monophosphate in the patient samples.

### **Regions of differential methylation in genomes with R882H mutations detected by meDIP-chip**

182 genomic regions had statistically different methylation levels (at specific genomic locations) that were related to *DNMT3A* mutation status (**Supplementary Figure 8B** and **Supplementary Table 6**). The methylation status of only two loci correlated precisely with the R882 mutation. An example of one such region near the *ESRP2* gene on chromosome 16 is shown in **Supplementary Figure 9**. In one region (shaded in gray), all non-mutated genomes (top 5 samples) have a methylation peak, and all *DNMT3A* mutant genomes (bottom 5 colored samples) have no detectable peak at the same location. Of note, there was no change in the level of expression of the nearest neighbor genes in the samples with the mutation.

### **Predicted consequences of *DNMT3A* mutations**

The most common mutation in *DNMT3A* was found at amino acid position R882. Strong selection for mutations at this position suggest that the R882 mutations have a gain-of-function activity, similar in principle to that recently demonstrated for *IDH1* and 2.<sup>8,9</sup> In our study, 37/62 (60%) of patients with *DNMT3A* mutations

had mutations at this site (R to H most common, followed by R to C, and R to P or R to S; **Supplementary Table 2**). Yamashita, *et al*, recently reported R882H or R882C mutations in 3/74 AML samples tested; the low frequency could be related to technical issues, or the selection of patients used in their study.<sup>10</sup> The pattern of mutations is remarkably similar to the pattern seen in the *IDH1* gene, where recurring missense mutations (predominantly R to H or R to C) are found only at amino acid R132. Our data show that heterozygous R882H mutations are associated with reduced methylation at a small subset of genomic positions, suggesting that the mutation may in fact have a dominant negative effect on the methylase activity of this enzyme. Yamashita, *et al*, found that *DNMT3A* with an R882H mutation had reduced activity in a *de novo* methylation assay, and did not confer global changes in CpG methylation when transfected into Ba/F3 cells.<sup>10</sup> In a domain-mapping experiment, Gowher, *et al*, also showed that a mutation at position R882 reduced the enzymatic activity of the methylase domain, and reduced DNA binding activity.<sup>11</sup> Importantly, an inherited, homologous mutation (R823G) in the *DNMT3B* gene has been identified in patients with the ICF syndrome (immunodeficiency, centromeric instability, and facial abnormalities), which is characterized in part by chromosomal rearrangements in lymphocytes.<sup>12, 13</sup> Since *DNMT3A* has been shown to interact with many proteins, including *DNMT3L*, SUMO-1, transcriptional repressors, histone modifying proteins, and TP53,<sup>14</sup> it is also possible that the R882 mutations alter one or more of these interactions, or create alternative activities that are currently unknown. In addition to the *de novo* methylation activity of *DNMT3A*, there is evidence that *DNMT3A* may also play a role in maintenance of methylation through its recruitment to nucleosomes and specific chromatin regions that contain methylated DNA.<sup>15</sup>

The diversity of mutations in the *DNMT3A* gene is reminiscent of the large number of mutations that inactivate classical tumor suppressor genes like *TP53* or *BRCA1*.<sup>16, 17</sup> The nonsense and frameshift mutations of *DNMT3A* are all predicted to result in truncated proteins that eliminate (8 of 11) or shorten (3 of 11) the methylase domain;<sup>18</sup> several are associated with nonsense-mediated decay, clearly demonstrating loss of function (**Supplementary Figure 4**). The distribution of frameshift, nonsense, and missense mutations in *DNMT3A* are remarkably similar to the pattern of mutations seen in the *DNMT3B* gene in the ICF syndrome.<sup>19, 20</sup> Missense mutations are generally found within the methylase domain (37 of 38), near the homodimer interface (R882C, R882H, R882P), along the length of the *DNMT3L* interacting helix (R729Q, R729W, R736H, A741V), or near the DNA binding groove (P718L, R792H, R803S, K829R, R882C, R882H, R882P, F909C; see **Supplementary Figure 16**).<sup>18, 21</sup> Mutations commonly occur at charged positions (10 of 12) and may alter or abolish homo/heterodimeric complexes and DNA binding properties. The SIFT/Polyphen algorithms suggest that many of the missense mutations are deleterious for protein function, but some are not (**Supplementary Table 2**). Of note, *DNMT3A* haploinsufficiency is not deleterious to mice,<sup>22</sup> and complete loss of *DNMT3A* in the bone marrow cells of mice does not overtly alter hematopoiesis in the short term.<sup>23</sup> Although

many *DNMT3A* mutations clearly cause loss-of-function (nonsense mediated decay, truncation, deletion, some missense mutations), many more studies will be required to understand how these mutations contribute to AML pathogenesis.

### **Overall survival of patients with *DNMT3A* mutations and other common AML mutations**

Several large studies have documented that adult AML patients harboring poor risk genotypes (*FLT3* mutations, *FLT3* mutations with *NPM* wild-type, and *IDH* mutants) have an inferior overall survival. We, therefore, examined the impact of *DNMT3A* mutations in patients with poor risk genotypes. *DNMT3A* mutations conferred a significantly worse overall survival for patients with *FLT3* mutations ( $p=0.0006$ ), for patients with WT *NPM1* ( $p=0.01$ ), and for patients with *FLT3* mutations who are *NPM1* wild-type ( $p=0.04$ ) (**Supplementary Figure 13**). There was a trend towards worse overall survival for patients with *DNMT3A* mutations and *IDH1* mutations ( $p=0.06$ ), but not for the few patients with *IDH2* mutations, or *IDH1* and 2 mutations combined. *DNMT3A* mutations were also associated with a worse overall survival for patients with favorable risk genotypes (*FLT3* wild-type, *NPMc*, *IDH1* or *IDH2* wild-type ( $p\leq 0.02$ ), but not for patients who were both *FLT3* wild-type and *NPMc* mutant (**Supplementary Figure 14**). The presence of a *FLT3* ITD mutation did confer a worse overall survival for patients with *DNMT3A* mutations, although the number of cases with both mutations is small ( $n=16$ ) (**Supplementary Figure 15**,  $p=0.02$ ).

### **Multivariate Analysis of Event Free and Overall Survival**

The relationship between *DNMT3A* status and both overall and event-free survival was examined by multivariate Cox Proportional Hazards models. The variables that were independently associated with overall survival were *DNMT3A* mutations, age>60, and *FLT3* mutations. FAB=M3 was used as a stratifying variable because it did not satisfy the proportionality assumption. After adjusting for age, FAB=M3, and *FLT3* mutations, the hazard ratio for *DNMT3A* mutations was 1.90 (95% confidence interval: 1.34-2.71.) The variables that were independently associated with event-free survival included age>60, *FLT3* mutations, favorable cytogenetics, and *DNMT3A* mutations. As with overall survival, FAB=M3 was used as a stratifying variable. After adjusting for age>60, FAB=M3, *FLT3* mutation, and favorable cytogenetics, the hazard ratio for *DNMT3A* mutation was 1.46 (95% confidence interval: 1.02 – 2.08)

### **Inherited SNPs in the *DNMT3A* gene**

Six inherited single nucleotide polymorphisms (SNPs) were identified in the coding region of *DNMT3A* in normal DNA from AML cases (**Supplementary Table 7**). All six SNPs were synonymous, four were novel alleles, and two were previously known (rs2276598, rs41284843). The minor allele frequencies (MAFs) of the four novel alleles were all <0.01 and were not considered further. For rs2276598 and rs41284843, there was no difference in allele or genotype frequencies between AML cases with or without *DNMT3A* mutations, or between



AML cases (Caucasian only) and CEU controls from pilot 1 of the 1,000 Genomes project.

### C. Supplementary Literature Cited.

1. Mardis ER, Ding L, Dooling DJ, et al. Recurring mutations found by sequencing an acute myeloid leukemia genome. *N Engl J Med* 2009;361:1058-66.
2. Payton JE, Grieselhuber NR, Chang LW, et al. High throughput digital quantification of mRNA abundance in primary human acute myeloid leukemia samples. *J Clin Invest* 2009;119:1714-26.
3. Song L, James SR, Kazim L, Karpf AR. Specific method for the determination of genomic DNA methylation by liquid chromatography-electrospray ionization tandem mass spectrometry. *Anal Chem* 2005;77:504-10.
4. Burke DG, Griffiths K, Kassir Z, Emslie K. Accurate measurement of DNA methylation that is traceable to the international system of units. *Anal Chem* 2009;81:7294-301.
5. Friso S, Choi SW, Dolnikowski GG, Selhub J. A method to assess genomic DNA methylation using high-performance liquid chromatography/electrospray ionization mass spectrometry. *Anal Chem* 2002;74:4526-31.
6. Hosmer DW, Lemeshow S. Regression Modeling of Time to Event Data. In: *Applied Survival Analysis*: John Wiley & Sons, Inc.; 1999.
7. Ley TJ, Mardis ER, Ding L, et al. DNA sequencing of a cytogenetically normal acute myeloid leukaemia genome. *Nature* 2008;456:66-72.
8. Dang L, White DW, Gross S, et al. Cancer-associated IDH1 mutations produce 2-hydroxyglutarate. *Nature* 2009;462:739-44.
9. Ward PS, Patel J, Wise DR, et al. The common feature of leukemia-associated IDH1 and IDH2 mutations is a neomorphic enzyme activity converting alpha-ketoglutarate to 2-hydroxyglutarate. *Cancer Cell*;17:225-34.
10. Yamashita Y, Yuan J, Suetake I, et al. Array-based genomic resequencing of human leukemia. *Oncogene*;29:3723-31.
11. Gowher H, Loutchanwoot P, Vorobjeva O, et al. Mutational analysis of the catalytic domain of the murine Dnmt3a DNA-(cytosine C5)-methyltransferase. *J Mol Biol* 2006;357:928-41.
12. Xu GL, Bestor TH, Bourc'his D, et al. Chromosome instability and immunodeficiency syndrome caused by mutations in a DNA methyltransferase gene. *Nature* 1999;402:187-91.
13. Hansen RS, Wijmenga C, Luo P, et al. The DNMT3B DNA methyltransferase gene is mutated in the ICF immunodeficiency syndrome. *Proc Natl Acad Sci U S A* 1999;96:14412-7.
14. Wang YA, Kamarova Y, Shen KC, et al. DNA methyltransferase-3a interacts with p53 and represses p53-mediated gene expression. *Cancer Biol Ther* 2005;4:1138-43.

15. Jones PA, Liang G. Rethinking how DNA methylation patterns are maintained. *Nat Rev Genet* 2009;10:805-11.
16. Walsh T, Casadei S, Coats KH, et al. Spectrum of mutations in BRCA1, BRCA2, CHEK2, and TP53 in families at high risk of breast cancer. *JAMA* 2006;295:1379-88.
17. Varley JM. Germline TP53 mutations and Li-Fraumeni syndrome. *Hum Mutat* 2003;21:313-20.
18. Gowher H, Liebert K, Hermann A, Xu G, Jeltsch A. Mechanism of stimulation of catalytic activity of Dnmt3A and Dnmt3B DNA-(cytosine-C5)-methyltransferases by Dnmt3L. *J Biol Chem* 2005;280:13341-8.
19. Ehrlich M, Sanchez C, Shao C, et al. ICF, an immunodeficiency syndrome: DNA methyltransferase 3B involvement, chromosome anomalies, and gene dysregulation. *Autoimmunity* 2008;41:253-71.
20. Jiang YL, Rigolet M, Bourc'his D, et al. DNMT3B mutations and DNA methylation defect define two types of ICF syndrome. *Hum Mutat* 2005;25:56-63.
21. Jia D, Jurkowska RZ, Zhang X, Jeltsch A, Cheng X. Structure of Dnmt3a bound to Dnmt3L suggests a model for de novo DNA methylation. *Nature* 2007;449:248-51.
22. Okano M, Bell DW, Haber DA, Li E. DNA methyltransferases Dnmt3a and Dnmt3b are essential for de novo methylation and mammalian development. *Cell* 1999;99:247-57.
23. Tadokoro Y, Ema H, Okano M, Li E, Nakauchi H. De novo DNA methyltransferase is essential for self-renewal, but not for differentiation, in hematopoietic stem cells. *J Exp Med* 2007;204:715-22.
24. Klimasauskas S, Kumar S, Roberts RJ, Cheng X. HhaI methyltransferase flips its target base out of the DNA helix. *Cell* 1994;76:357-69.

#### **D. Supplementary Figure Legends.**

**Supplementary Figure 1. Summary of *DNMT3A* SNVs found in CALGB AML samples.** The locations of validated SNVs (single nucleotide variants) in the *DNMT3A* gene are shown for 94 AML samples obtained from CALGB are shown. These cases are described in **Supplementary Table 1** and Mardis, et al<sup>1</sup>. Since no matched normal tissue was available for these tumor samples, these mutations are not proven to be somatic. However, none has been described in dbSNP, and none were inherited SNPs in our analysis of 188 additional AML cases. The locations of the PWWP (proline-tryptophan-tryptophan-proline), ZNF (zinc finger), and MTase (methyltransferase) domains are shown. Each patient with a *DNMT3A* mutation is designated with a circle.

**Supplementary Figure 2. Map of a 1.5 Mb deletion encompassing *DNMT3A*.** A 1.5 Mb deletion was detected in UPN 113971 with whole genome sequencing, by defining low coverage of this region of chromosome 2 in the tumor sample only. The results were confirmed on Affymetrix 6.0 SNP arrays. The deleted region includes all or part of 9 genes, including *DNMT3A*.

**Supplementary Figure 3. Expression data for *DNMT* genes in AML cases.**

Expression arrays were performed for 180 AML cases, and data for the probesets measuring *DNMT3A* (upper left), *DNMT3L* (upper right), *DNMT3B* (lower left) and *DNMT1* (lower right) are shown. Each dot represents one sample. Expression levels for R882 mutations, any other *DNMT3A* mutation, or no *DNMT3A* mutation, are shown; expression levels are not significantly altered by *DNMT3A* mutations. All of the expression calls for the *DNMT3L* gene were called “absent” on the expression arrays. Expression levels for these genes are also shown for normal adult bone marrow derived CD34 cells, flow-purified promyelocytes (pros), and flow-purified polymorphonuclear leukocytes (PMNs).<sup>2</sup>

**Supplementary Figure 4. cDNA readcounts for *DNMT3A* mutations.** Variant allele frequencies from cDNAs obtained from the bone marrow RNA of 21 different AML patients are shown. Regions containing the mutations were amplified by RT-PCR, and then sequenced using the 454-FLX platform to obtain deep readcounts for variant alleles. The data used to generate this figure are presented in **Supplementary Table 3**. Below each bar, the UPN for the patient sample is shown, followed by the mutation annotation.

**Supplementary Figure 5. Total numbers of putative somatic single nucleotide variants (SNVs) in sequenced AML genomes with and without *DNMT3A* mutations.** The data for this figure were extracted from whole genome sequencing data from 38 AML samples with normal cytogenetics, and a variety of FAB subtypes (M0,1,2,4, and 5). 11 of these samples had validated somatic mutations in *DNMT3A*, and 27 did not. The number of high confidence somatic SNVs for each “Tier” of each genome (described in Mardis, et al<sup>1</sup>) are plotted as a function of *DNMT3A* mutation status. Each genome is represented by a single point. The mean number of SNVs called is shown as a bar. The mean number of Tier 1 (genic) SNVs is significantly reduced in samples with *DNMT3A* mutations ( $p=0.0216$ ), but it is not different for any other Tier, nor for total mutations per genome (“All Calls”).

**Supplementary Figure 6. Summary of somatic SNV types and frequencies in AML genomes.** From the 38 sequenced AML genomes described in **Supplementary Figure 5**, we classified SNVs based on the nature of the base change identified, and the *DNMT3A* mutation status of that genome. All mutation types occur at nearly identical frequencies in genomes with *DNMT3A* mutations ( $n=11$ ) and without ( $n=27$ ). None of the differences is statistically different.

**Supplementary Figure 7. Summary of 5-methylcytosine content data from 51 AML genomes.** The percentage of 5-methylcytosine as a fraction of total cytosine is plotted from data presented in **Supplementary Table 5**. The 5-methylcytosine content of samples with and without *DNMT3A* mutations was not significantly different for all samples, nor for samples with R882 mutations.

**Supplementary Figure 8. Heatmaps of methylated genomic regions defined by Methyl-Chip analysis.** (A) Global heatmap of MeDIP-chip analysis using the NimbleGen 2.1M deluxe promoter array (containing all annotated CpG islands and promoters) using DNA samples from 5 AML samples without *DNMT3A* mutations (WT) or patients with R882H mutations. Each mutant sample was matched with a WT sample for FAB type and bone marrow blast %. Regions with reduced methylation are shown in blue, and with increased methylation, in green. The average log<sub>2</sub> ratios from 56,392 clusters with at least 20 probes in the cluster region were displayed by chromosomal position. The global pattern of methylation for CpG islands was unchanged in genomes with the R882H mutation. (B) Locations of 182 loci that were significantly hypomethylated (for at least three consecutive probes) in the five samples with *DNMT3A* mutations. Locations of each region and the methylation values are available in **Supplementary Table 6**. The data for the region near *ESRP2*, detailed in **Supplementary Figure 9**, is indicated.

**Supplementary Figure 9. Differential methylation of the *ESRP2* locus in samples with *DNMT3A* mutations.** Log<sub>2</sub>-normalized data are shown for a genomic region on chromosome 16 near the *ESRP2* gene. The data for five samples with wild-type *DNMT3A* genes (WT) are shown in black and gray at the top. The data for the five samples with R882H mutations are shown at the bottom. The shaded region is methylated in the WT samples, and unmethylated in the R882H samples. The center of this region is located 430 bp upstream from the 5' end of the *ESRP2* gene. The locations of known CpG islands are shown at the bottom.

**Supplementary Figure 10. Lack of a gene expression signature correlated with *DNMT3A* mutations.** Heatmap depicting unsupervised clustering of expression array data (Affymetrix U133+2) from 180 *de novo* AML cases. Relatively increased expression is indicated by red; relatively decreased expression by green; intermediate expression by black. The color legend below the heatmap indicates clinicopathological data; each row corresponds to the position of the row above the heatmap. The top row indicates the common AML karyotypes and cytogenetic risk groups: green = t(15;17), yellow = inv(16) or t(8;21), dark blue = normal karyotype, light blue = intermediate risk, gray = adverse risk including complex (>3 changes), white = not done. The middle row indicates the FAB subtype: orange = M0/M1, yellow = M2, dark green = M3, teal = M4, purple = M5, dark pink = M6, light pink = M7. The bottom row shows *DNMT3A* mutation status: white is wild type for *DNMT3A*, red indicates any of the R882 mutations, and yellow indicates non-R882 *DNMT3A* mutations.

**Supplementary Figure 11. Heatmap of unsupervised clustering analysis of 76 AML cases with normal karyotypes.** Heatmap depicting unsupervised clustering of expression array data (Affymetrix U133+2) from 76 *de novo* AML cases (Spotfire software). Relatively increased expression is indicated by red color; relatively decreased expression by green color; intermediate expression by

black color. The color legend below the heatmap indicates clinicopathological data. The top row shows *DNMT3A* mutation status: white is wild type for *DNMT3A*, red indicates one of the R882 mutations, and yellow indicates one of the non-R882 *DNMT3A* mutations. The bottom row indicates the FAB subtype: orange = M0/M1, yellow = M2, dark green = M3, teal = M4, purple = M5, dark pink = M6, light pink = M7.

**Supplementary Figure 12. Overall survival of AML patients with *DNMT3A* and intermediate risk cytogenetics.** Overall survival of AML patients without a *DNMT3A* mutation (dashed red line) compared to those with any *DNMT3A* mutation (blue line), with an R882 mutation (dashed green line), or with a non-R882 mutation (dashed brown line).

**Supplementary Figure 13. Overall survival of AML patients with *DNMT3A* mutations and poor risk genotypes.** (A) Overall survival of AML patients with (blue line) or without (dashed red line) *DNMT3A* mutations and a concurrent *FLT3* mutation (either ITD or any other mutation). Note that this dataset represents all *FLT3* mutations (ITD or any other mutation) in contrast to **Figure 3C**, where only *FLT3* ITD mutations are considered. (B) *NPM1* wild type patients, (C) patients with *FLT3* mutations (either ITD or any other mutation) and *NPM1* wild type, (D) patients with *IDH1* mutations, (E) patients with *IDH2* mutations, (F) patients with *IDH1* or *IDH2* mutations.

**Supplementary Figure 14. Overall survival of AML patients with *DNMT3A* mutations and favorable risk genotypes.** (A) Overall survival of AML patients with (blue line) or without (dashed red line) *DNMT3A* mutations that are *FLT3* wild type, (B) patients with *NPMc* mutations, (C) patients with wild type *FLT3* and *NPMc* mutations, (D) patients with wild type *IDH1*, (E) patients with wild type *IDH2*, or (F) patients with wild type *IDH1* and *IDH2*.

**Supplementary Figure 15. Overall survival of AML patients with *DNMT3A* and *FLT3* ITD mutations.** Overall survival of AML patients with *DNMT3A* mutations with (blue line) and without (dashed red line) *FLT3* ITD mutations.

**Supplementary Figure 16. Locations of AML mutations within the three dimensional structure of *DNMT3A*.** Side view of tetrameric *DNMT3A* (murine AA 623 – 908 (teal and dark blue) which corresponds to conserved human AA 627 - 912) and DNMT3L (light blue), interacting with S-adenosyl-L-methionine (AdoMet - white spacefill).<sup>21, 24</sup> Jia et al suggested that DNA binds this tetrameric complex along a structural groove (indicated by arrow).<sup>21</sup> Amino acids mutated along the proposed DNA binding groove are highlighted in red; amino acids mutated along the DNMT3L interacting helix are highlighted in green. R882 mutations occur near the homodimerization plane, but this residue has not been implicated in homodimerization (Jia et al calculated R885 to be a critical residue)<sup>21</sup>. The R882 side-chain protrudes into the DNA binding groove, and mutations at this position decrease both DNA binding and catalytic activity.<sup>11</sup>

Amino acids P718, R729, K829, R803, and F909 all occur along the DNA binding groove, and their side-chains are positioned into the solute; mutations at these positions may therefore alter DNA affinity or specificity. R729 and R736 occur along the DNMT3L interacting helix, and mutations at these positions may alter heterodimerization. A741V does not obviously alter the DNMT3L interacting helix, but this mutation occurs in conjunction with E477\* and may not be functionally relevant, since this mRNA is subject to nonsense mediated decay.

**Supplementary Figure 17. Overall survival of AML patients based on the number of mutations detected in the commonly mutated genes in AML (*FLT3*, *DNMT3A*, *IDH1/2*, and *NPM1*).** Patients with favorable cytogenetic risk profiles had either no mutations in these genes, or in *FLT3* only. The presence of a *FLT3* mutation did not alter OS in this group (data not shown). For all other cases, the impact of the numbers of mutations in the common AML genes on overall survival is shown. *IDH1* and *IDH2* mutations were pooled (these mutations are mutually exclusive). Only 4 cases had 4 mutations, so they were pooled with cases with 3 mutations (n=23) for clarity.

**Supplementary Figure 18. Overall survival of 187 AML patients collected at Washington University stratified by *DNMT3A* mutation status and allogeneic transplantation status.** (A) 48 patients without *DNMT3A* mutations were treated with an allogeneic transplantation at any time during their treatment course. 41 patients had an allogeneic transplant only and 7 had an allogeneic transplant following an autologous transplant. 94 patients without *DNMT3A* mutations were treated with an autologous transplant (n=7) or no transplant (n=87) during their treatment course. (B) Patients with *DNMT3A* mutations were treated with (n=16) or without (n=29) an allogeneic transplant during their treatment course, as defined in Panel A. 13 patients had an allogeneic transplant only and 3 had an allogeneic transplant following an autologous transplant. 29 patients with *DNMT3A* mutations were treated with an autologous transplant (n=7) or no transplant (n=22) during their treatment course. (C) 64 patients were treated with an allogeneic transplantation at any time during their treatment course. 16 patients had a *DNMT3A* mutation and 48 patients did not have a *DNMT3A* mutation. Overall survival of patients treated with an allogeneic transplant was independent of *DNMT3A* mutation status (p=0.30).

**Supplementary Table 1.** Patient Characteristics.

**Supplementary Table 2.** Summary of *DNMT3A* Mutations.

**Supplementary Table 3.** *DNMT3A* cDNA variant allele readcounts.

**Supplementary Table 4.** Mutation types in *DNMT3A* mutant vs. wild type genomes.

**Supplementary Table 5.** 5-methylcytosine content in *DNMT3A* mutant vs. wild type genomes.

**Supplementary Table 6.** Differentially methylated loci in *DNMT3A* genomes defined by meDIP-chip analysis.

**Supplementary Table 7.** *DNMT3A* SNP frequencies.

**Supplementary Table 8.** *DNMT3A* primers used to sequence all coding exons.

**Supplementary Table 9.** *DNMT3L* primers used to sequence all coding exons.

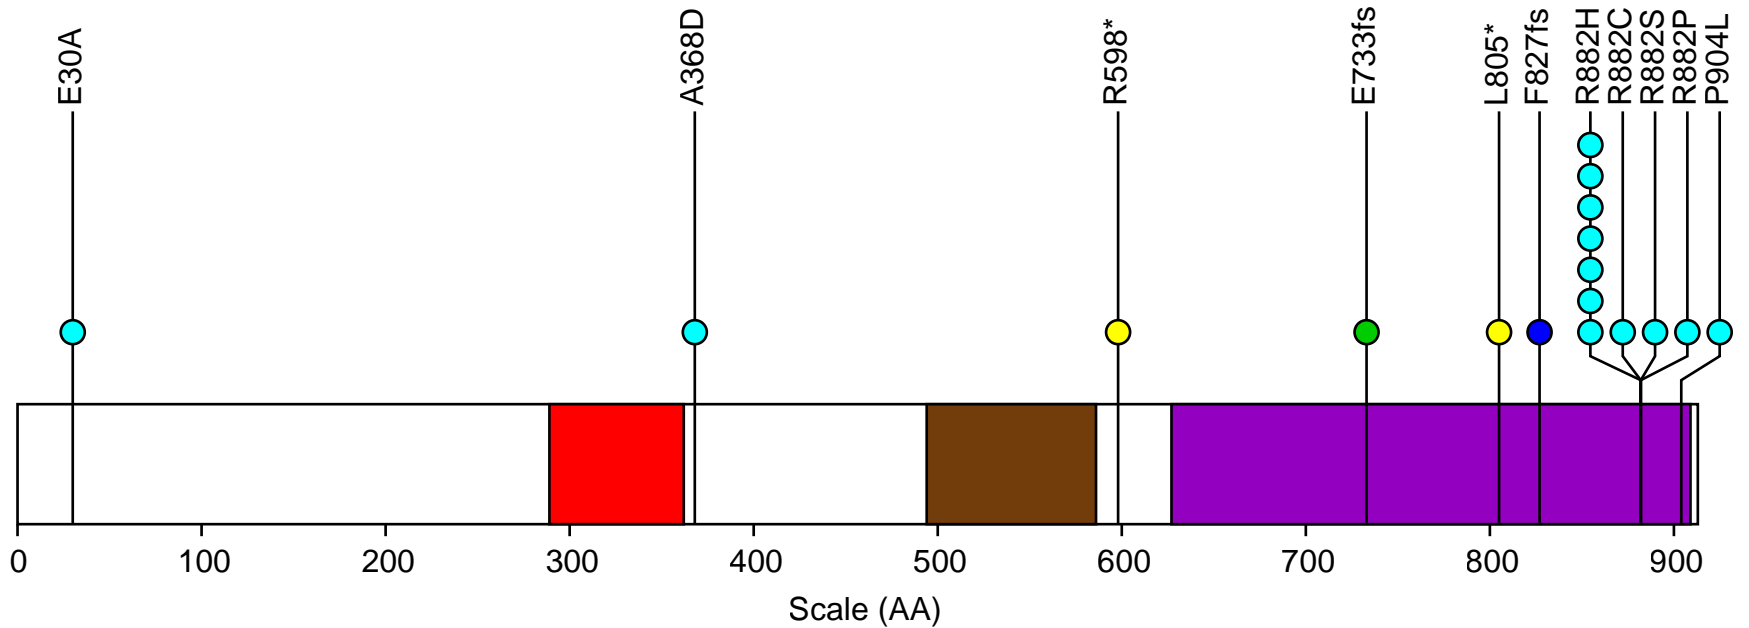

## DNMT3A

- frame shift deletion
- MTase
- frame shift insertion
- ZNF
- missense
- PWWP
- nonsense

Supplementary Figure 1.



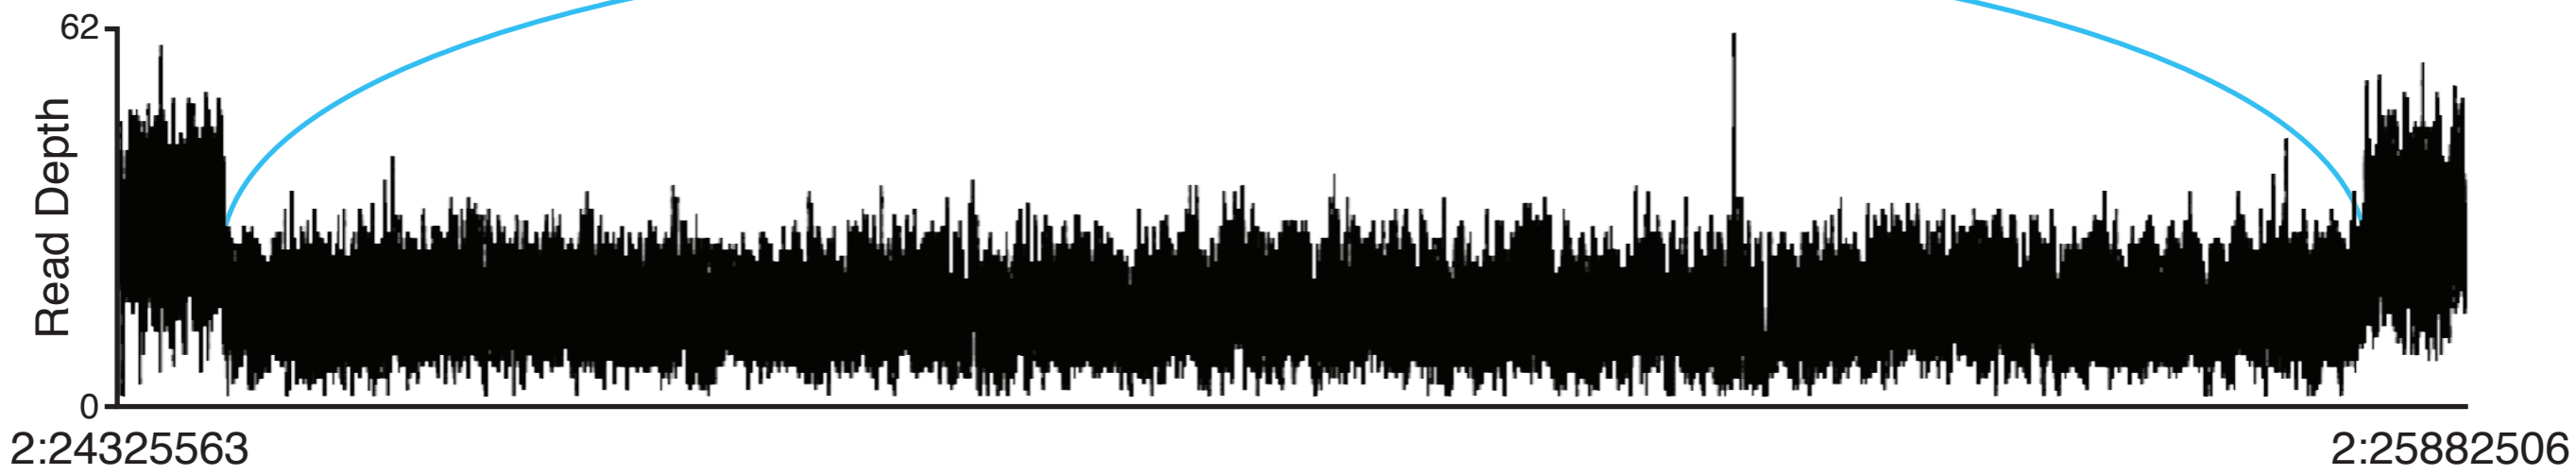

ITSN2

NCOA1

CENPO

ADCY3

RBJ

POMC

DNMT3A

DTNB

ASXL2

Supplementary Figure 2.

### DNMT3A

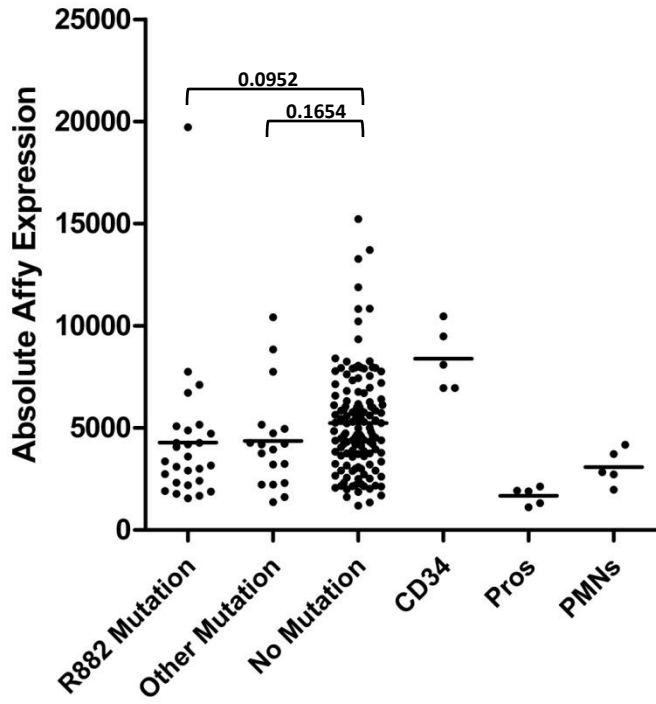

### DNMT3L

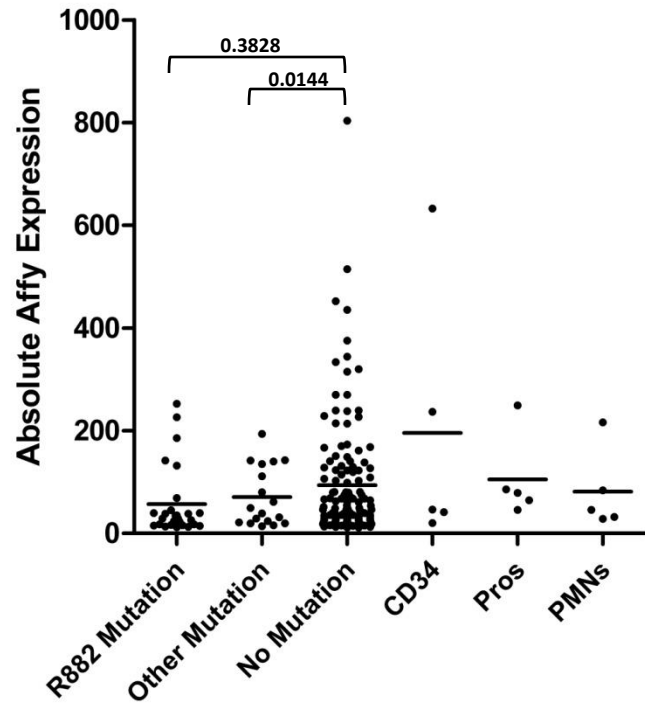

### DNMT3B

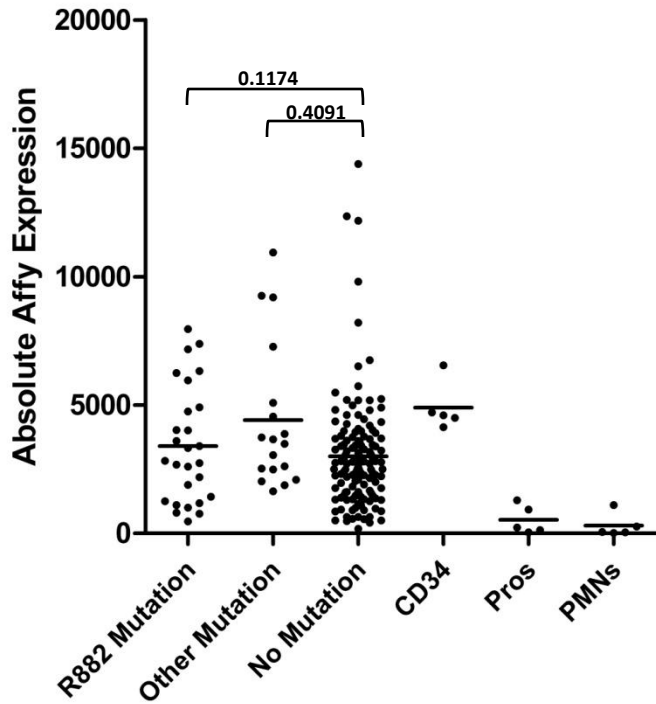

### DNMT1

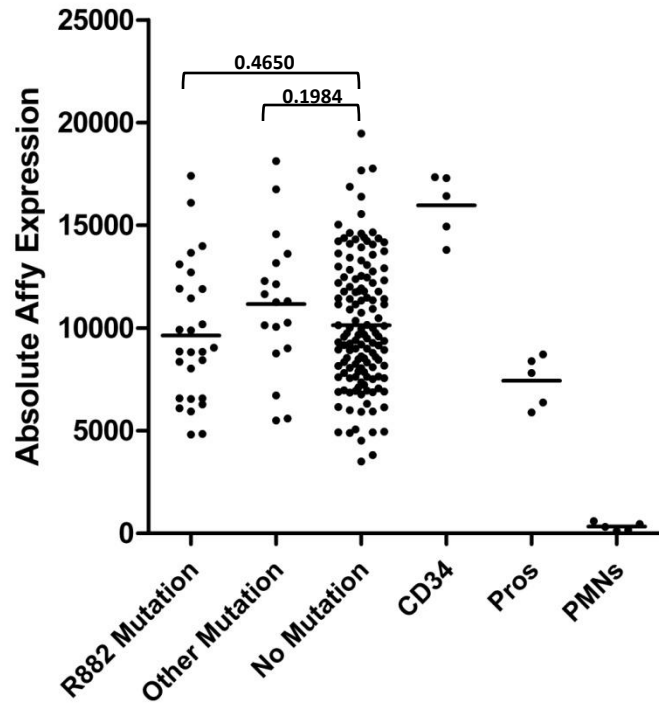

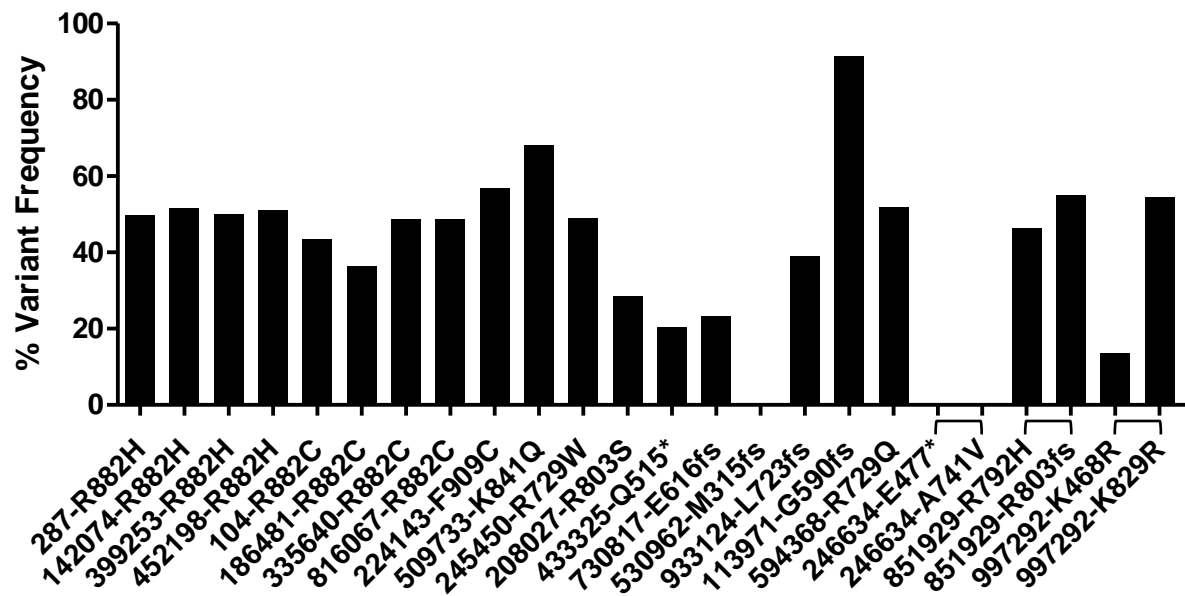

Supplementary Figure 4.

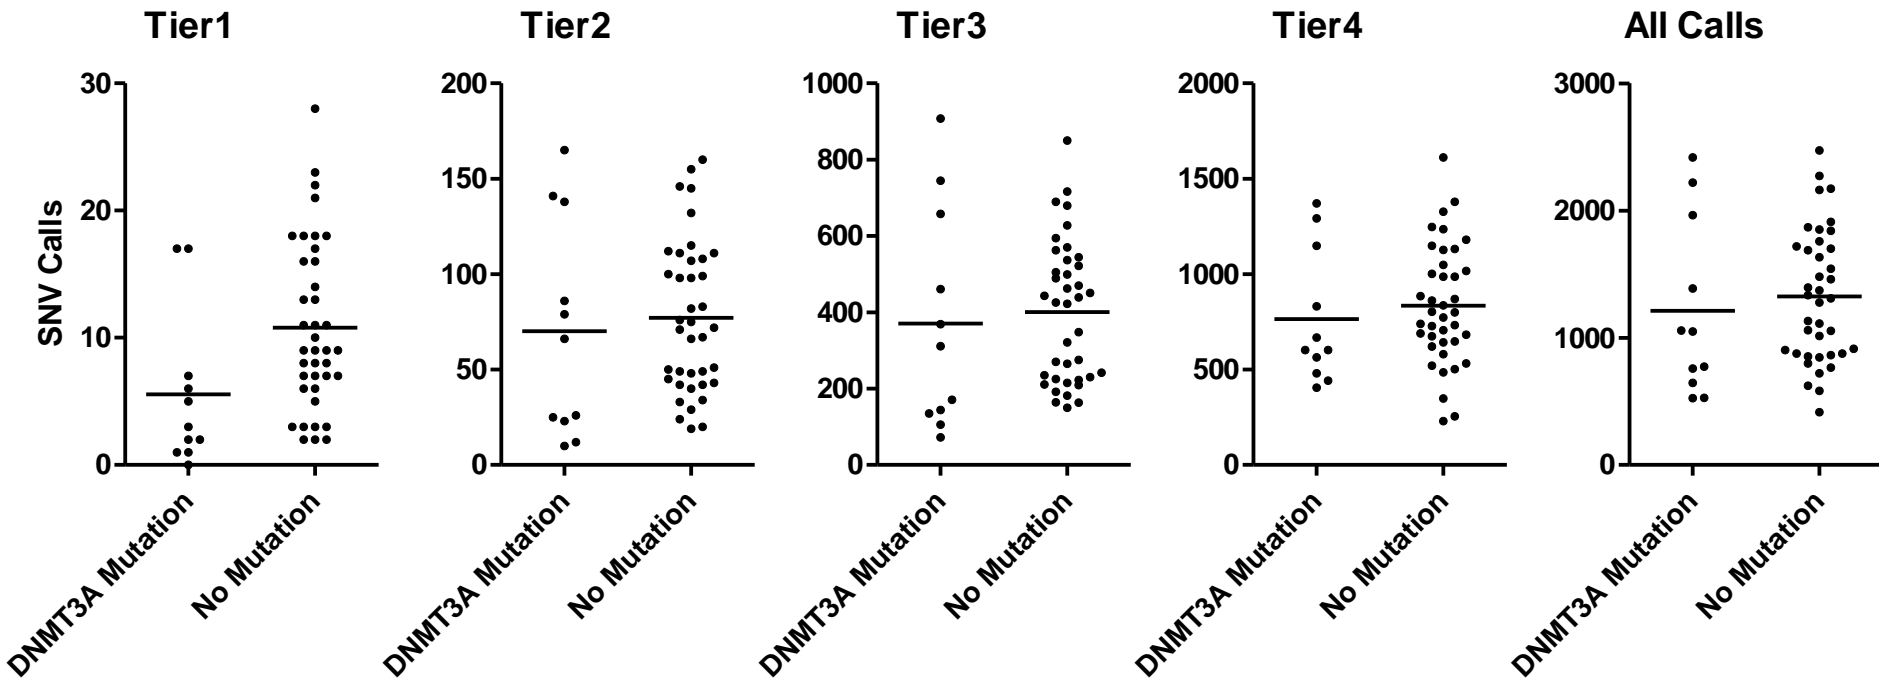

Supplementary Figure 5.

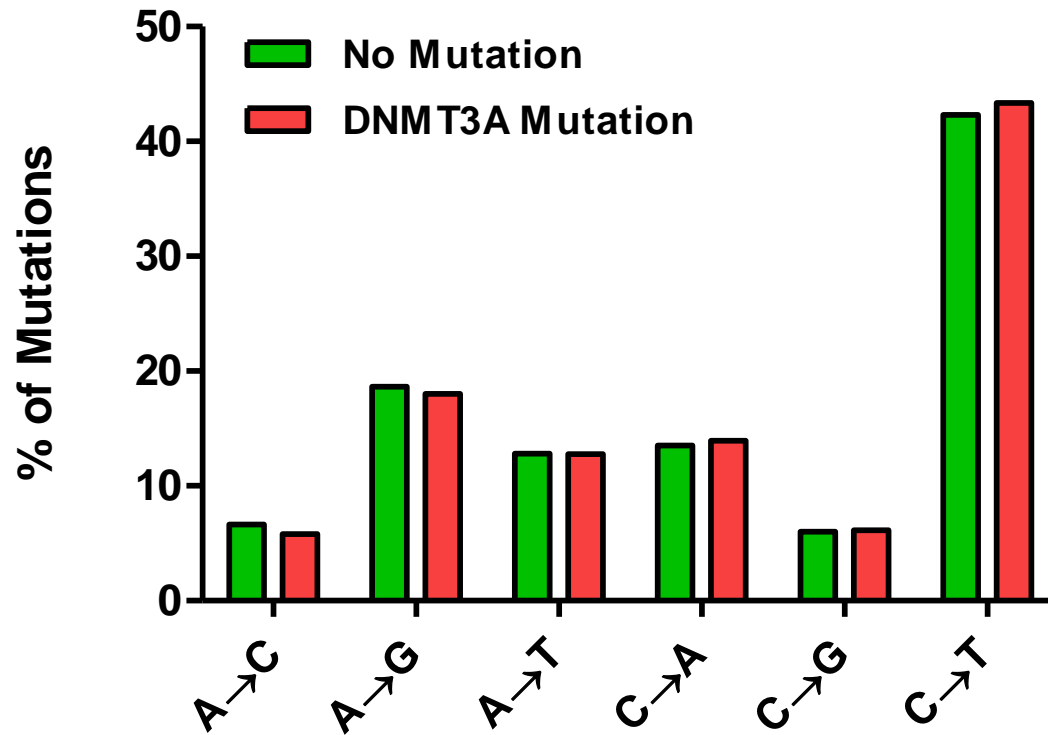

Supplementary Figure 6.

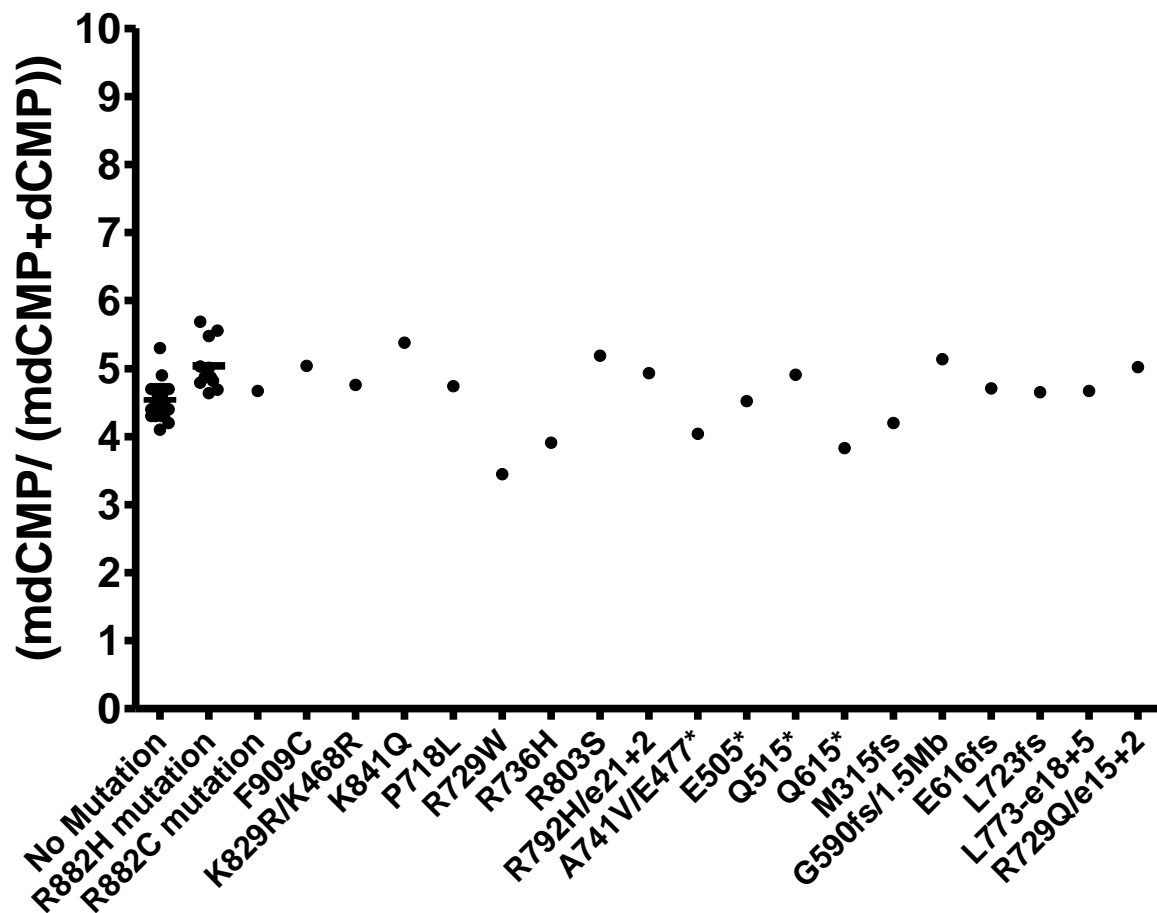

Supplementary Figure 7.

low methylation

high methylation

Supplementary Figure 8A

chromosome

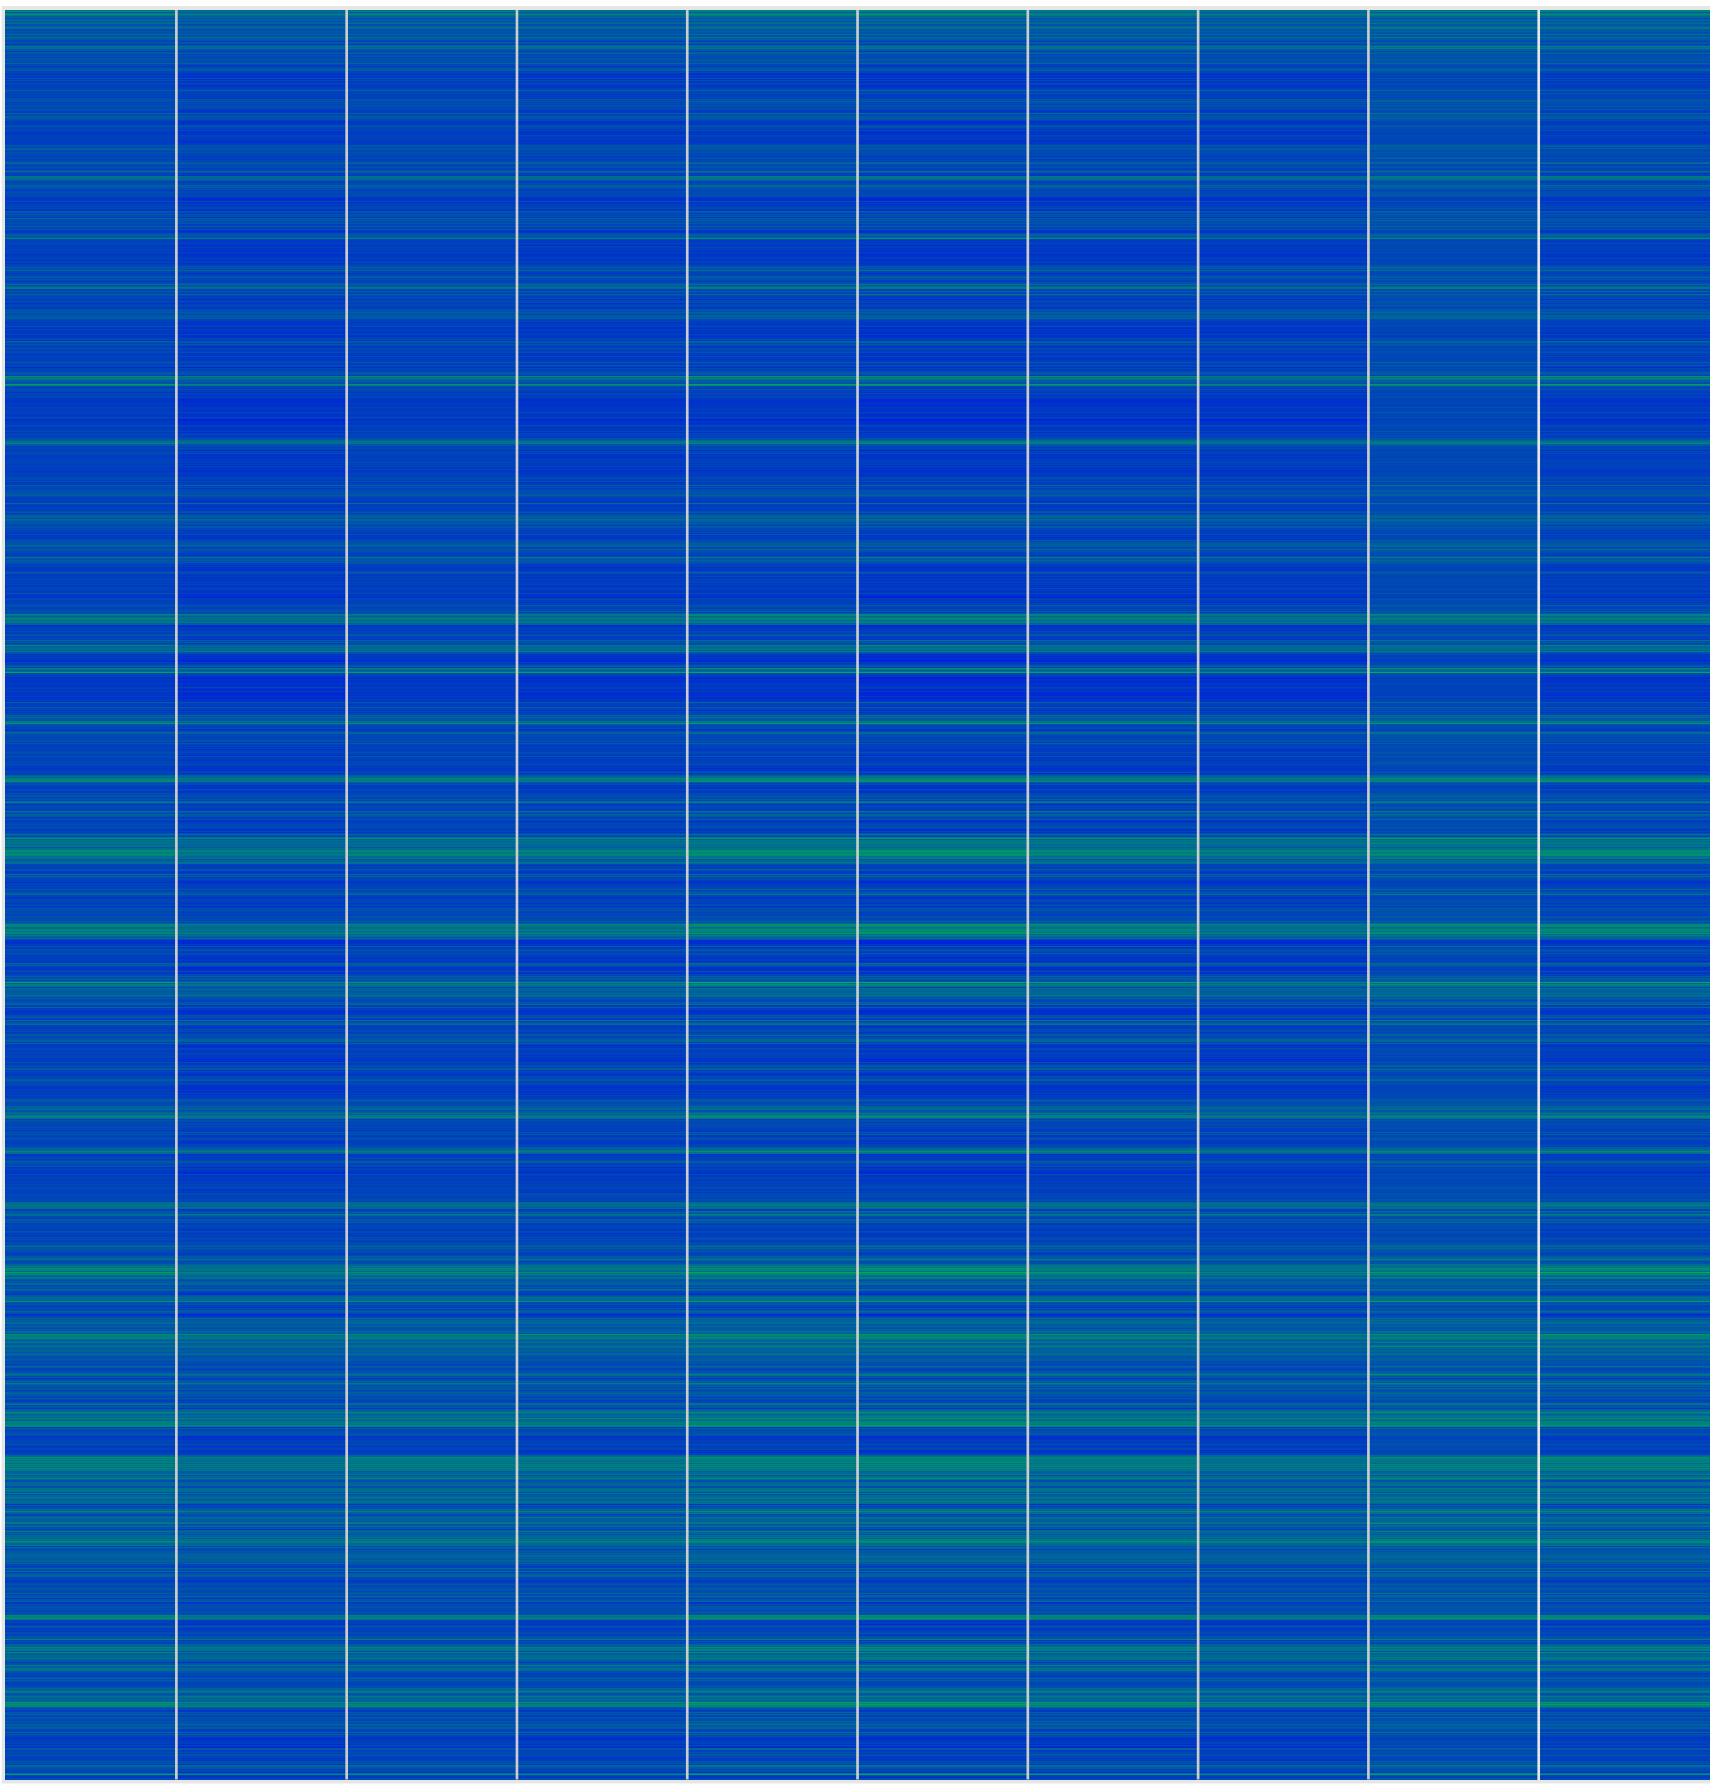

| Sample        | UPN    |
|---------------|--------|
| R882H - M2    | 817156 |
| R882H - M1    | 431799 |
| R882H - M4    | 142074 |
| R882H - M4    | 399253 |
| R882H - M5    | 737451 |
| Wildtype - M2 | 445045 |
| Wildtype - M1 | 545259 |
| Wildtype - M4 | 418499 |
| Wildtype - M4 | 868231 |
| Wildtype - M5 | 380949 |

Y

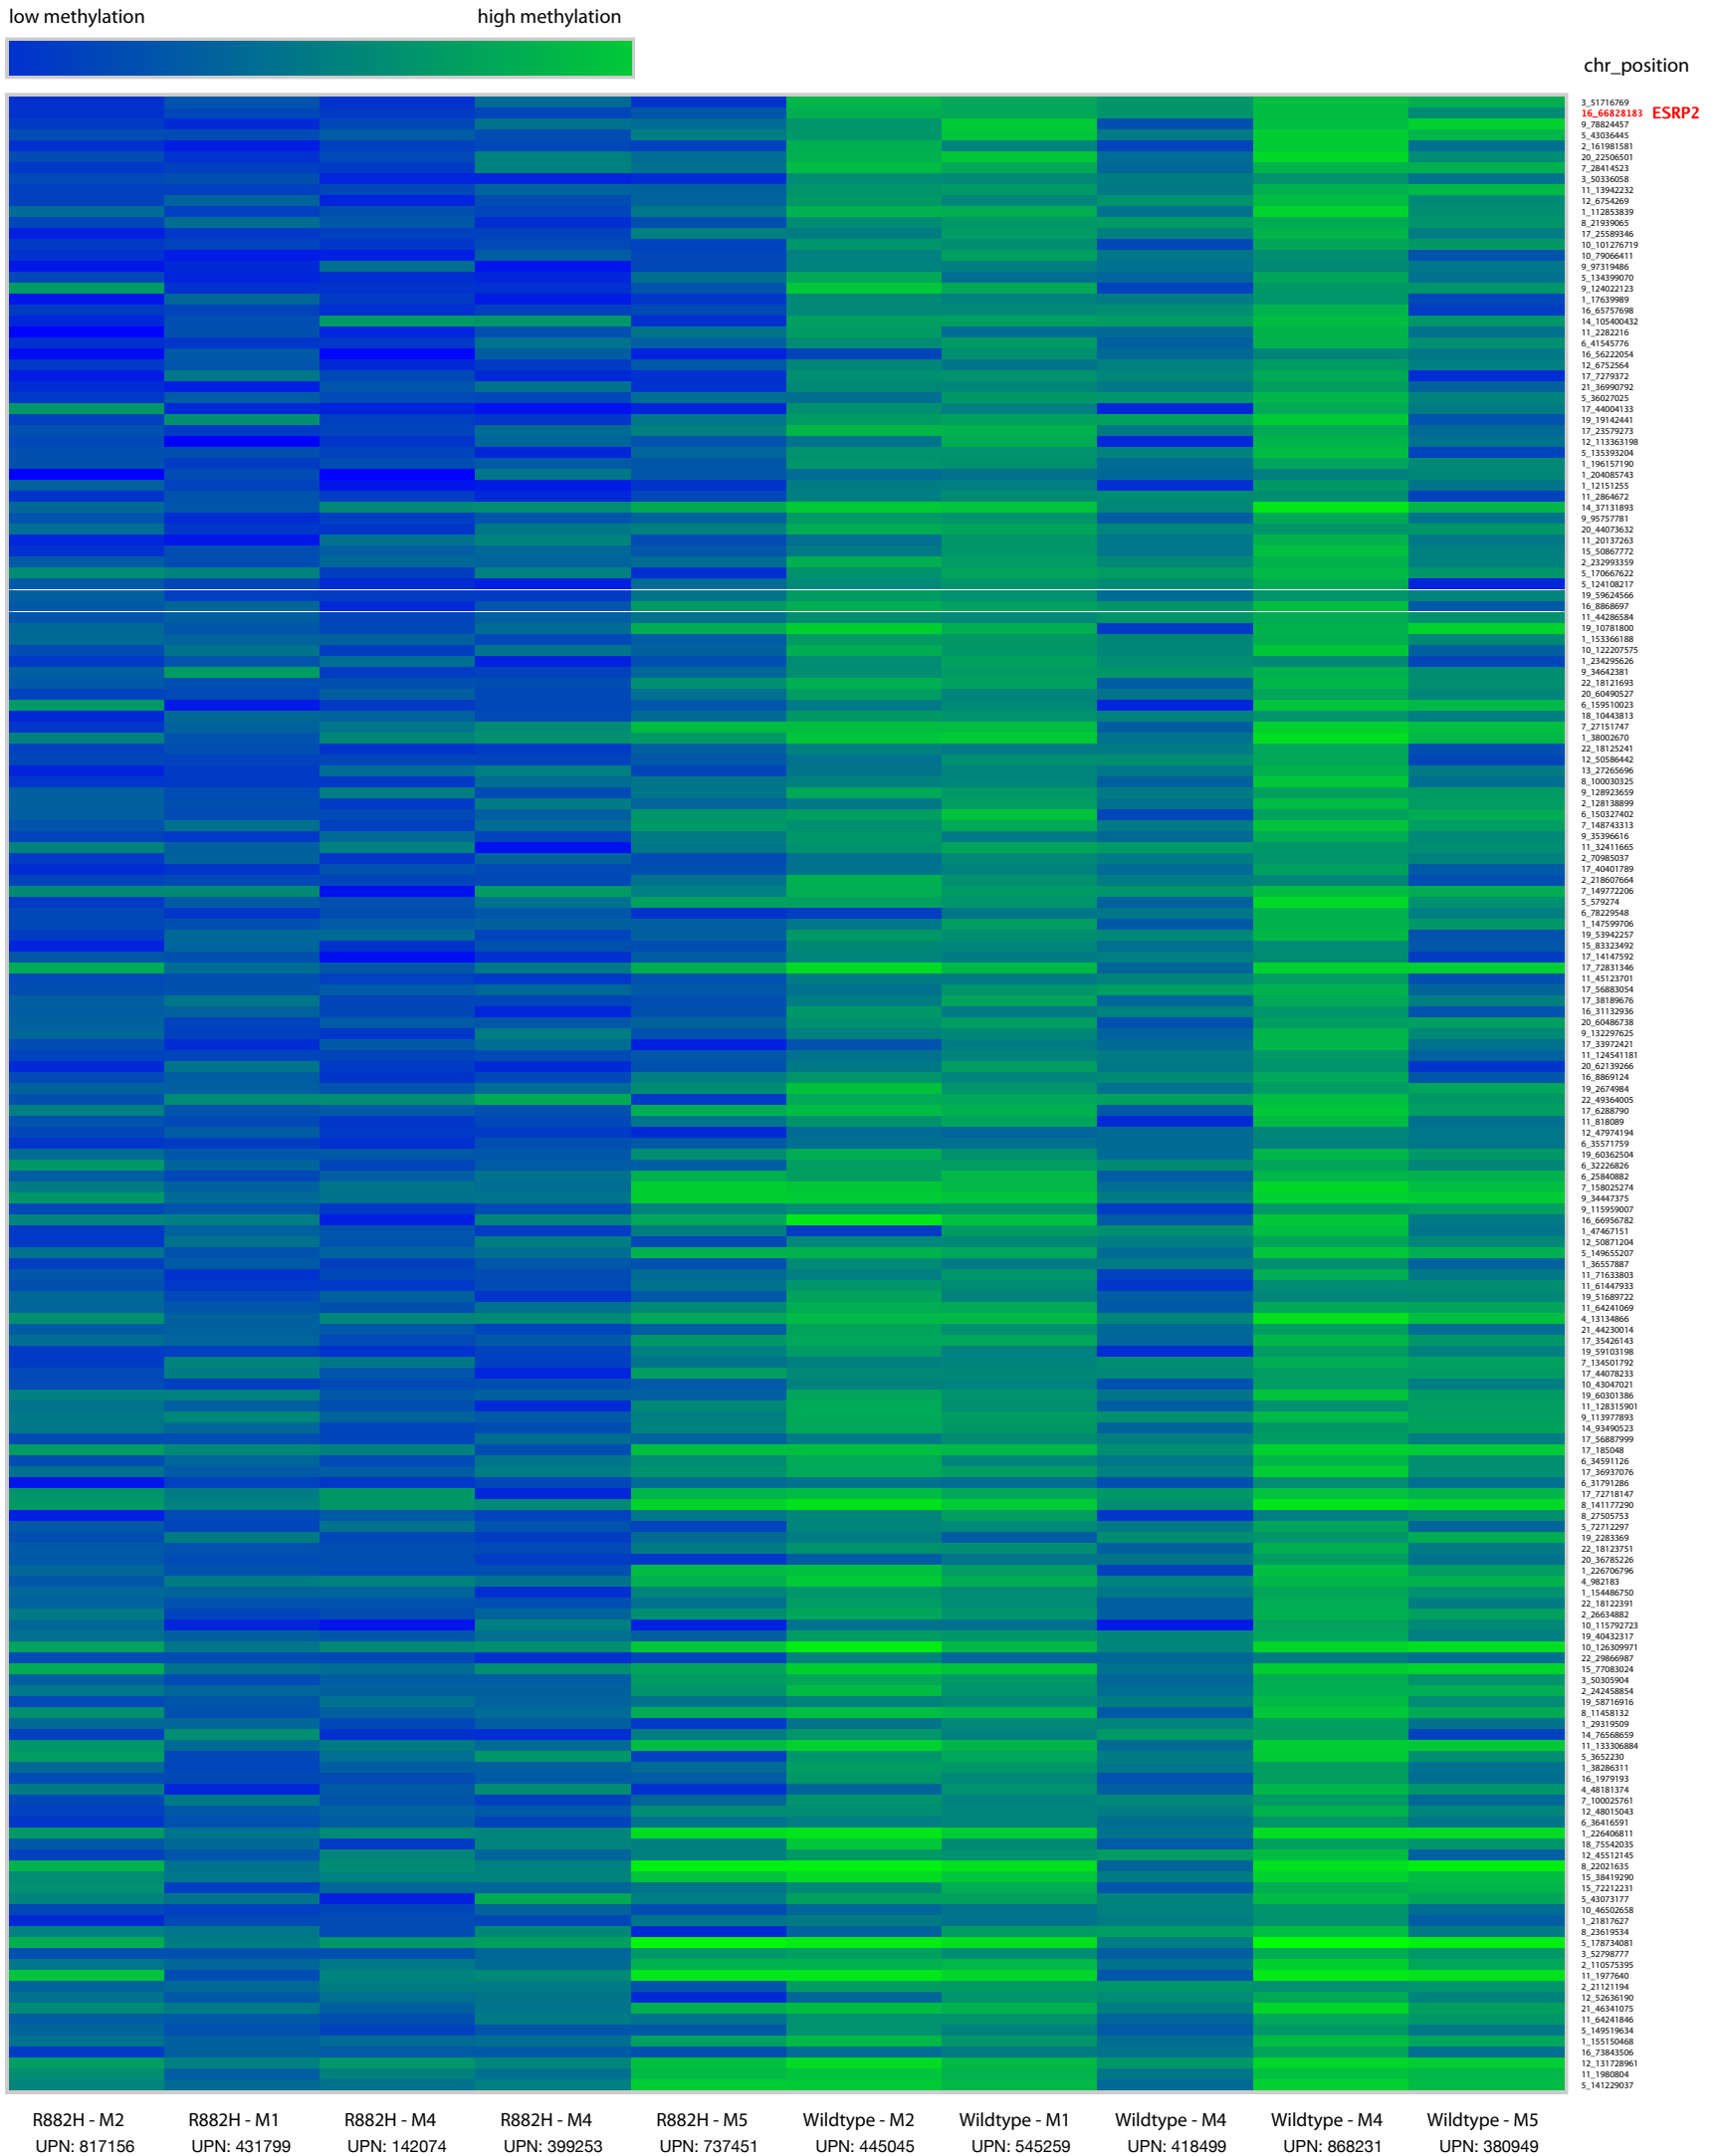



Supplementary Figure 9

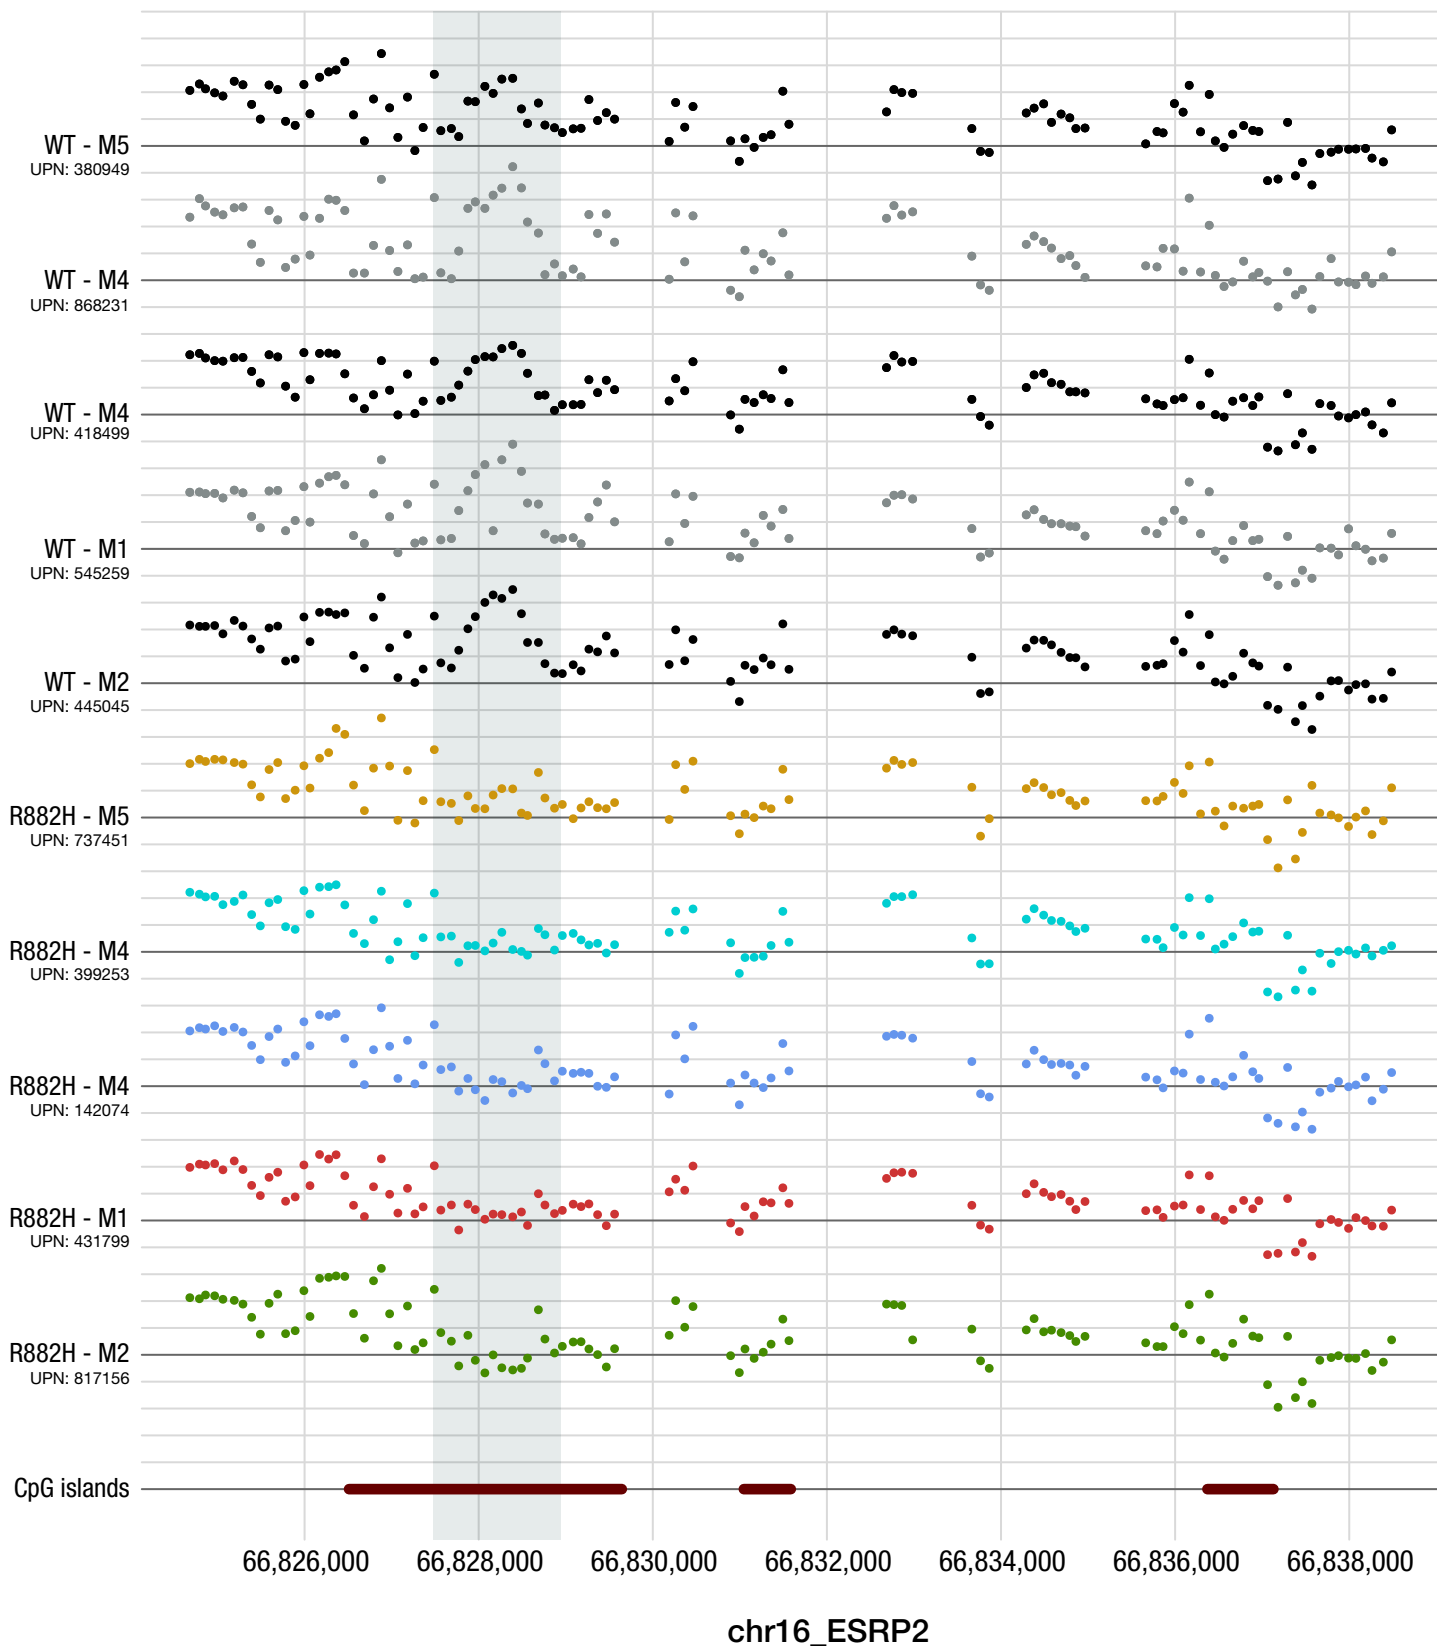

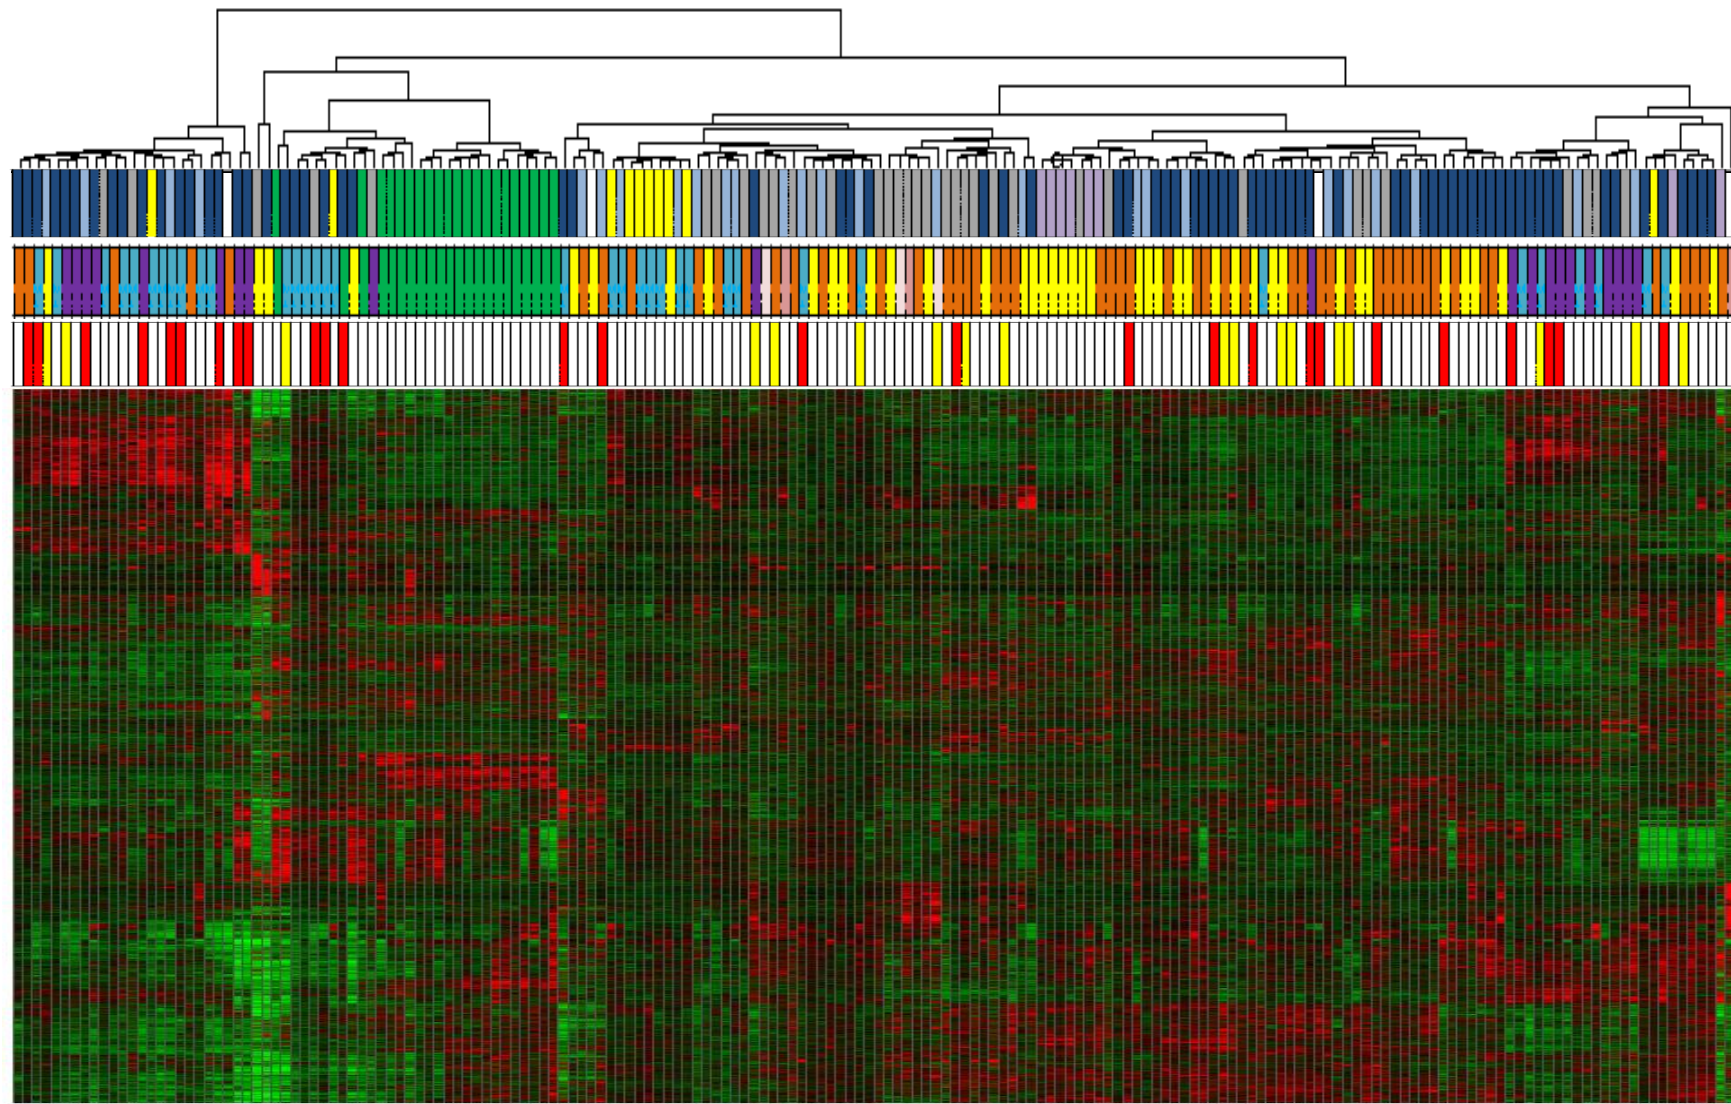

Supplementary Figure 10.

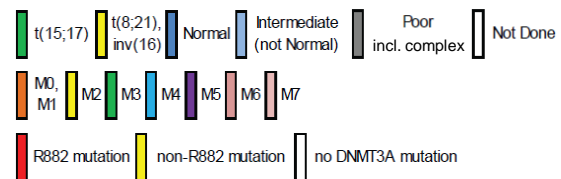

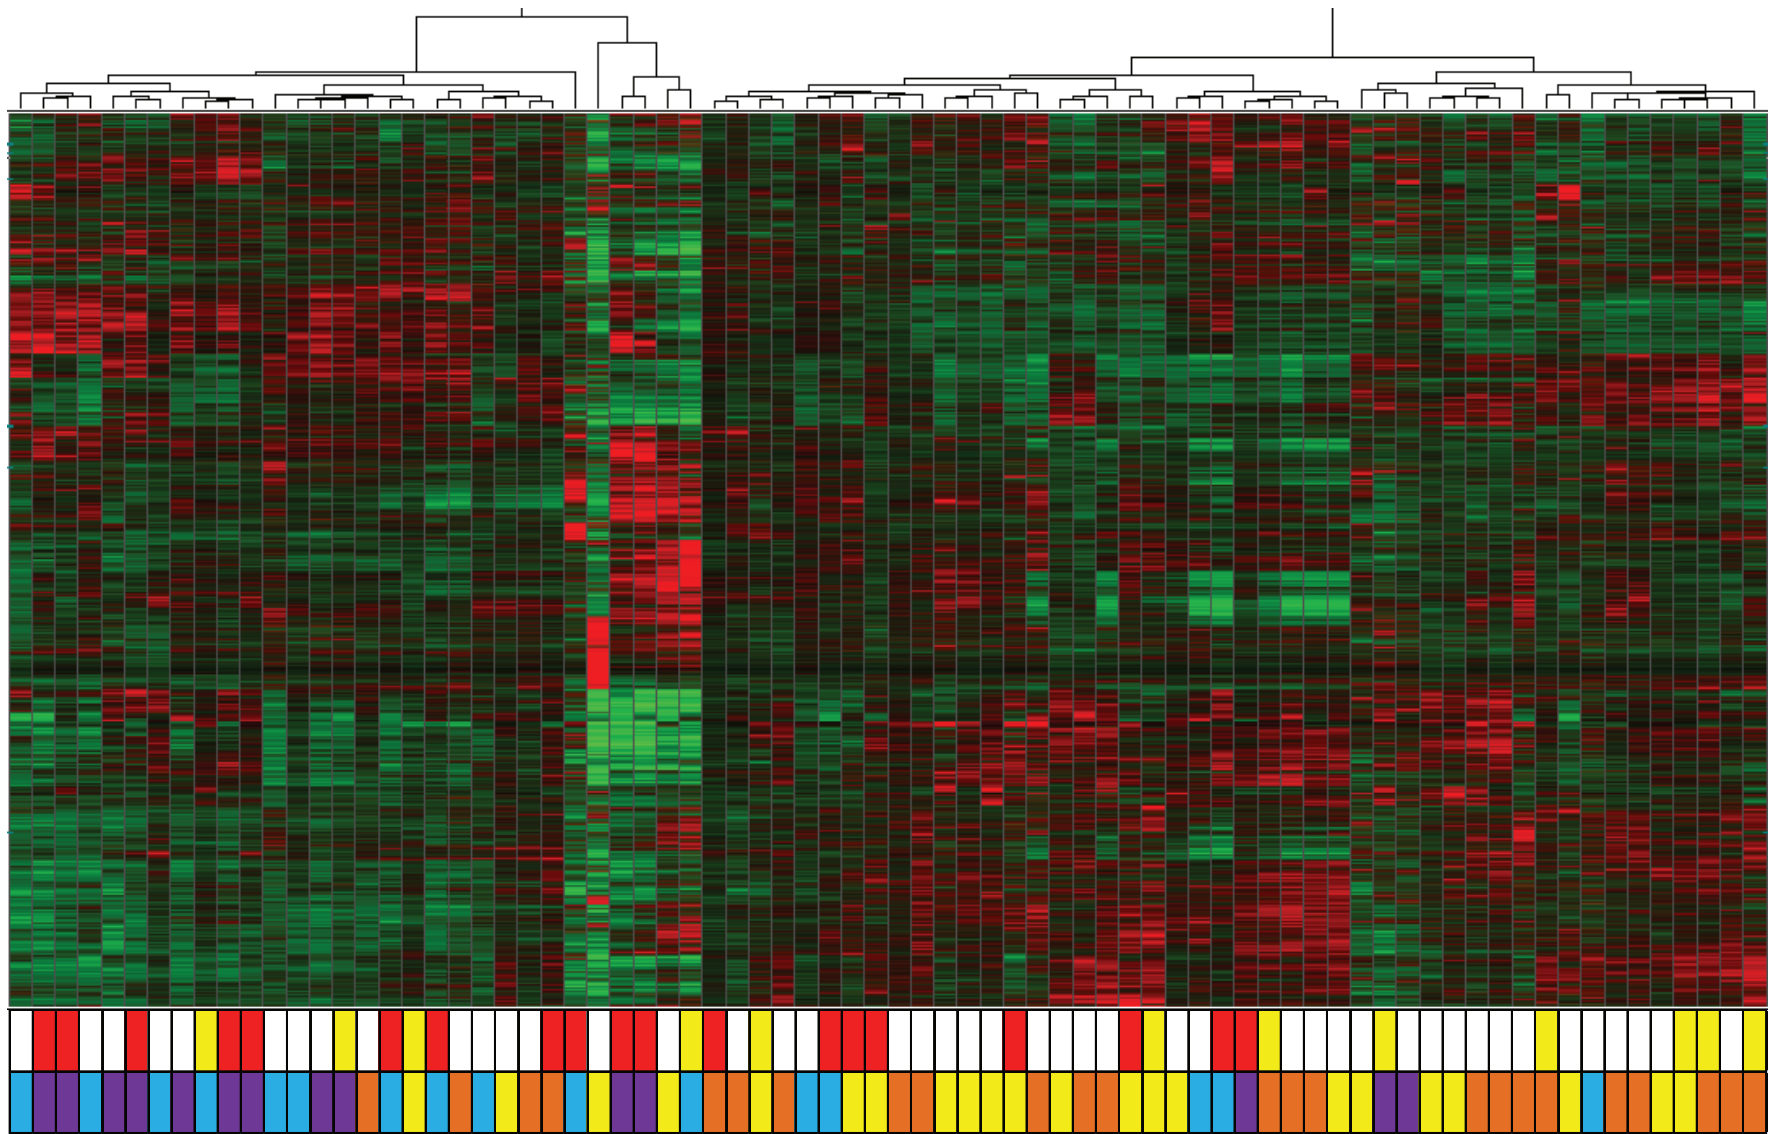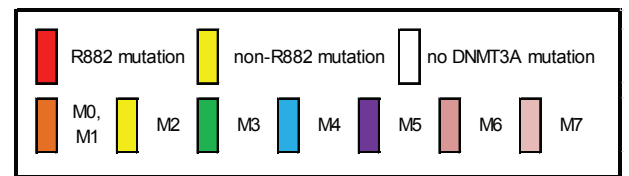

Supplementary Figure 11.

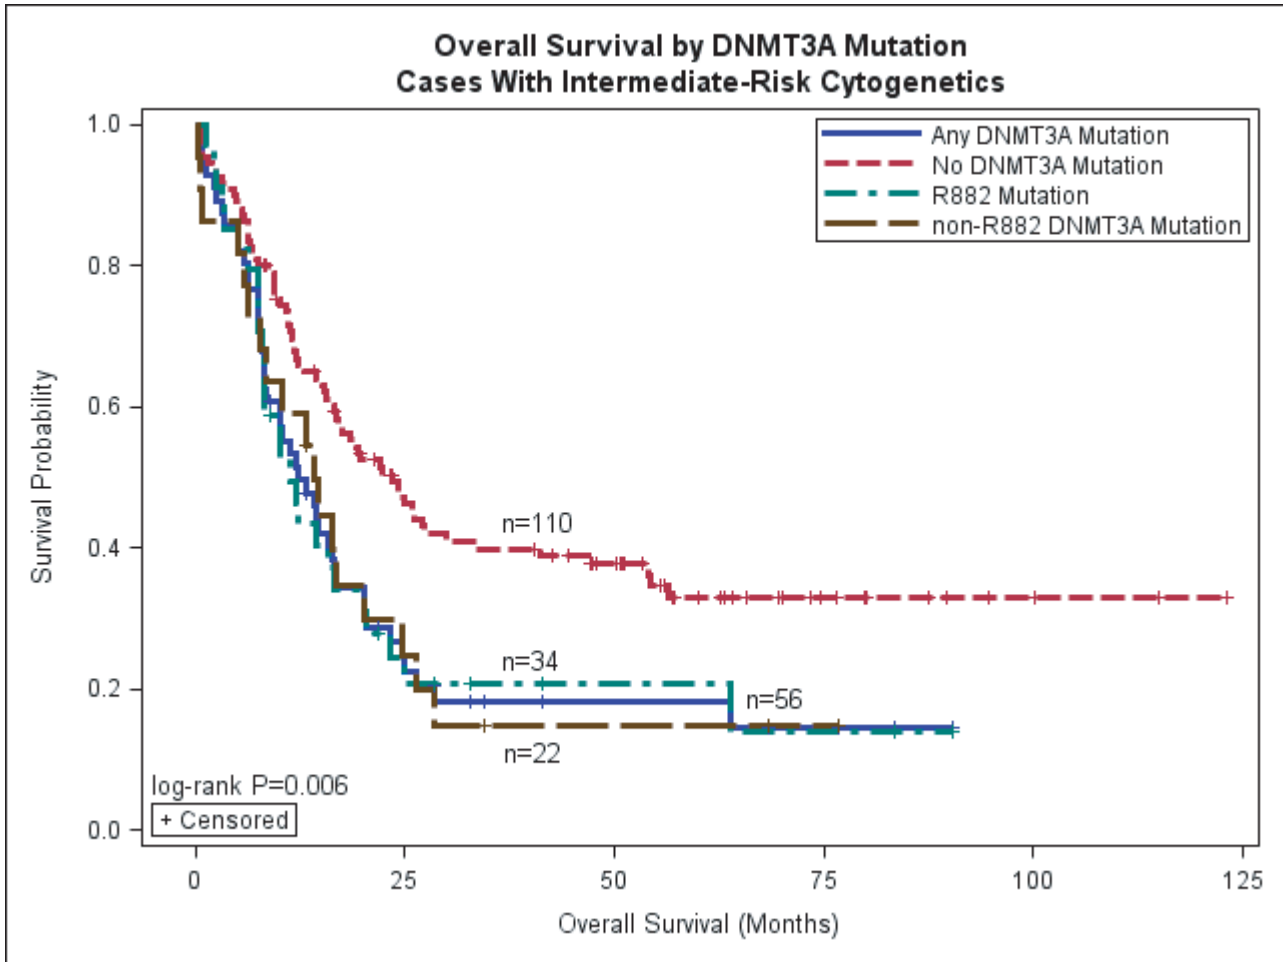

Supplementary Figure 12.

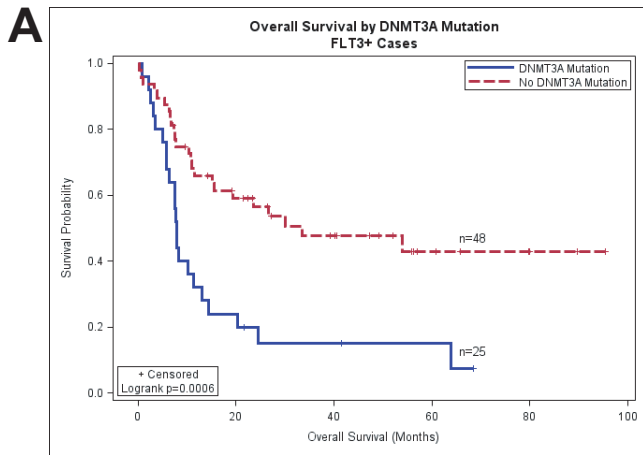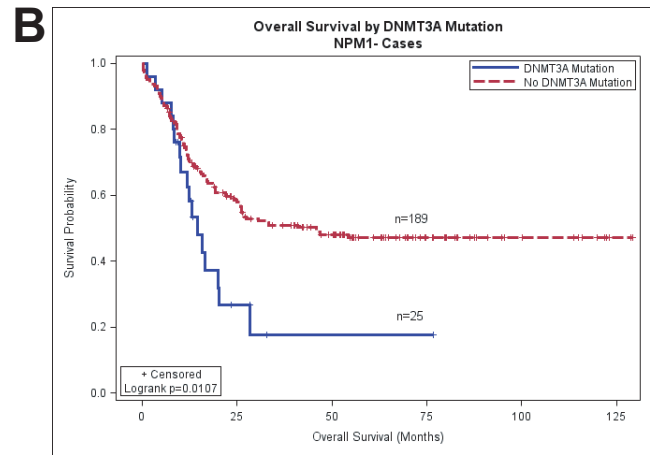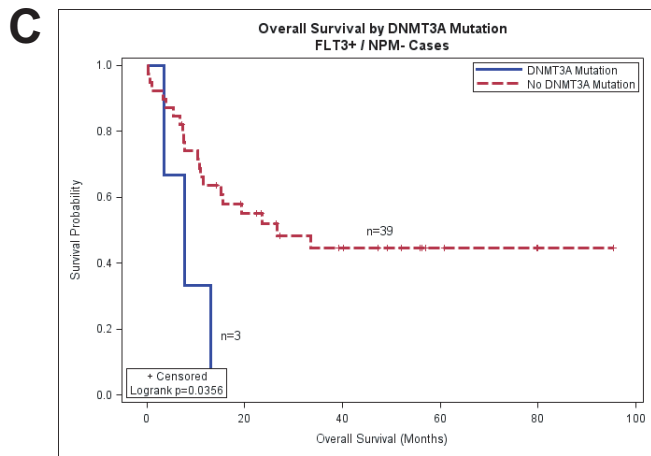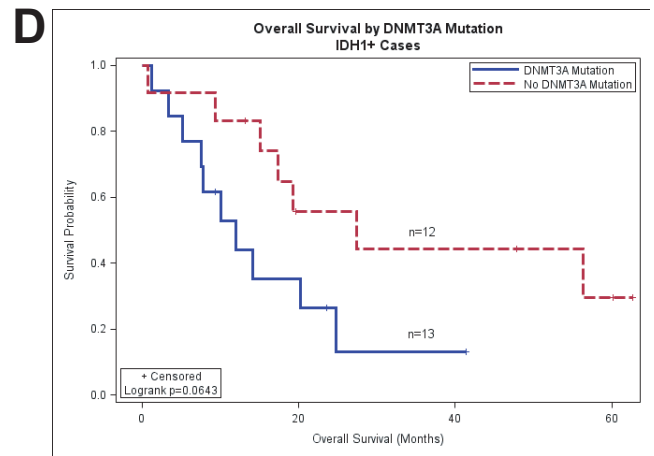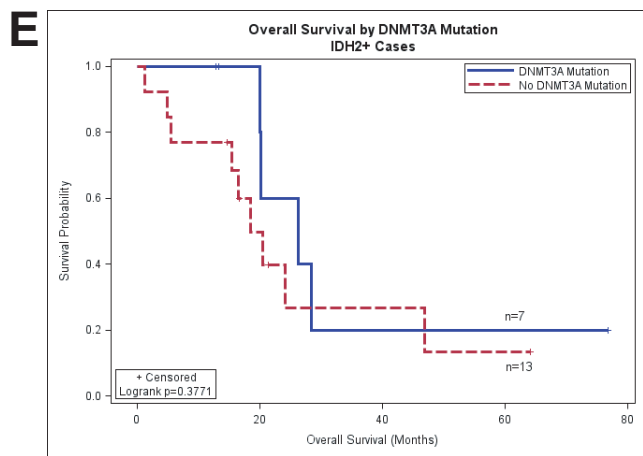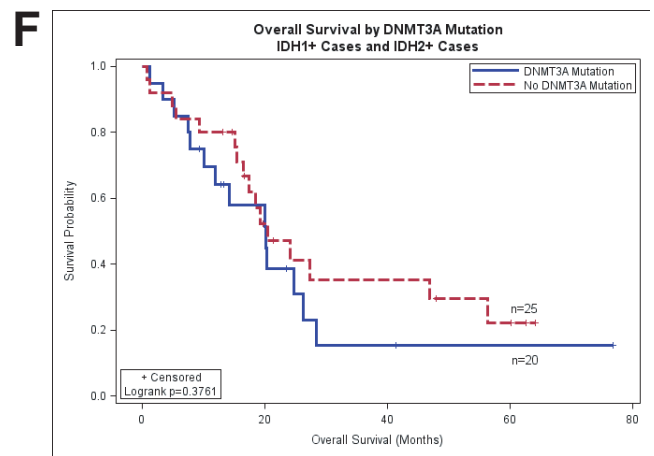

Supplementary Figure 13.

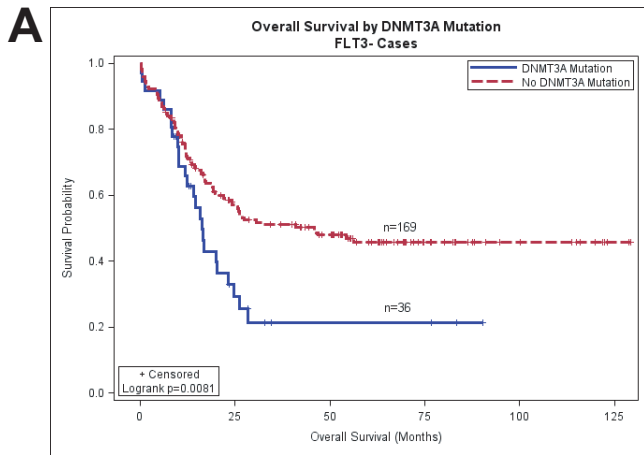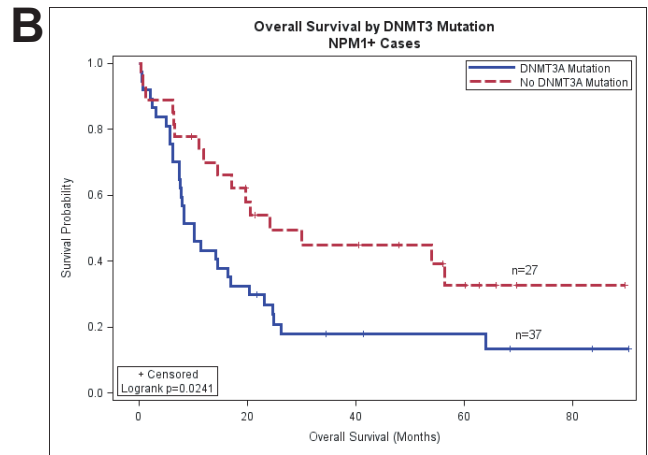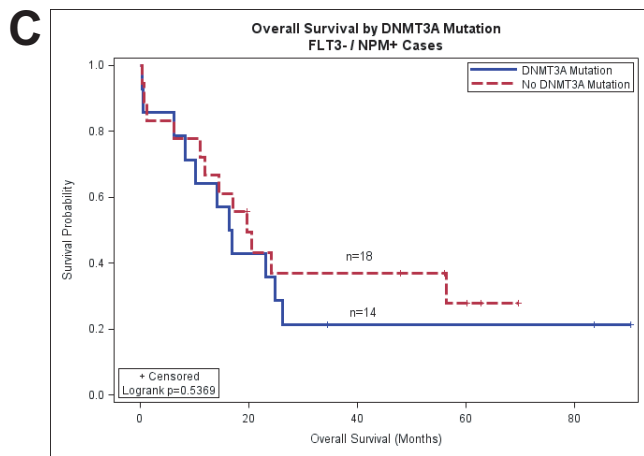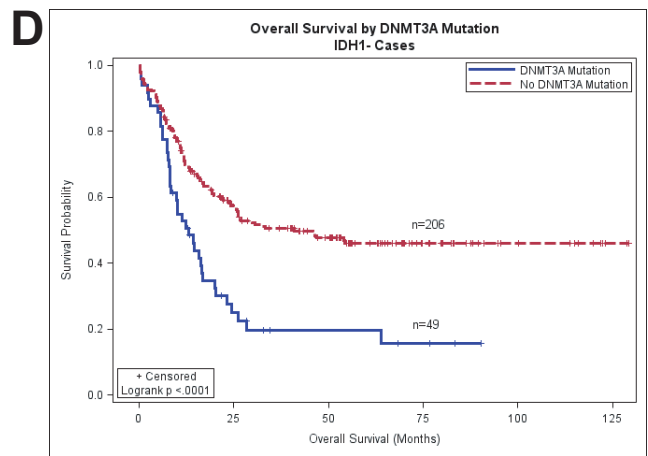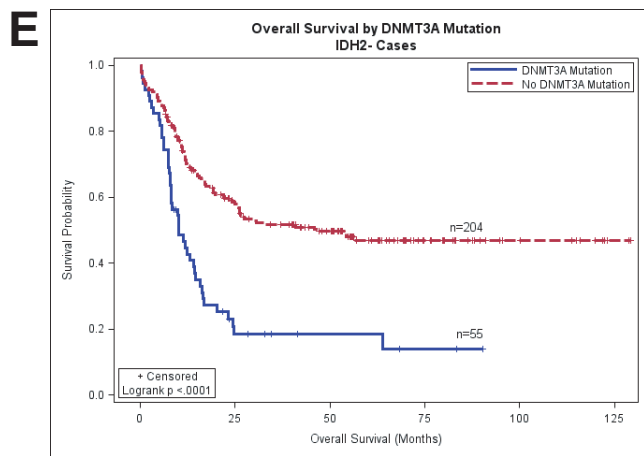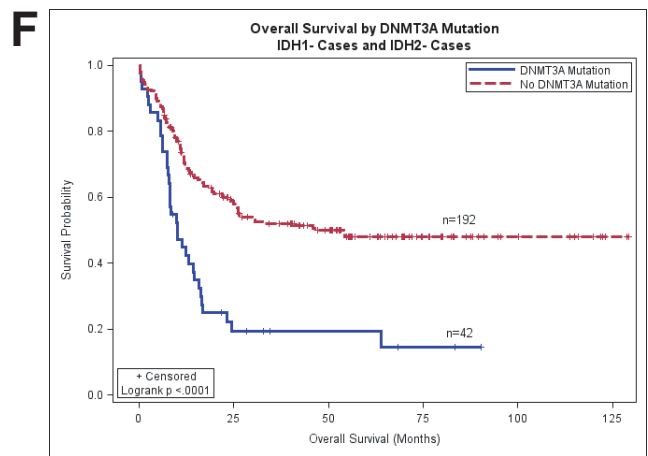

Supplementary Figure 14.

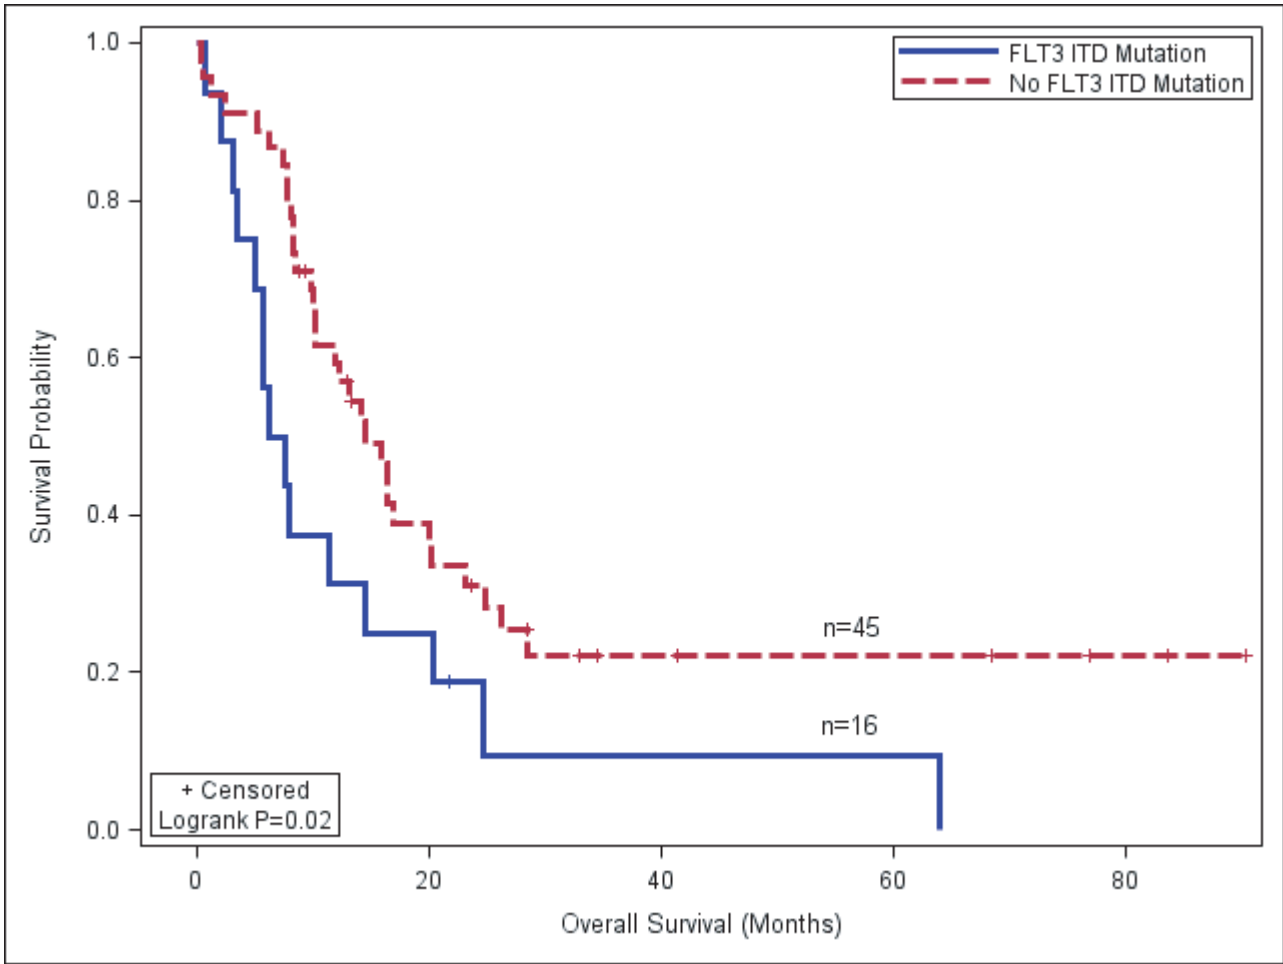

Supplementary Figure 15.



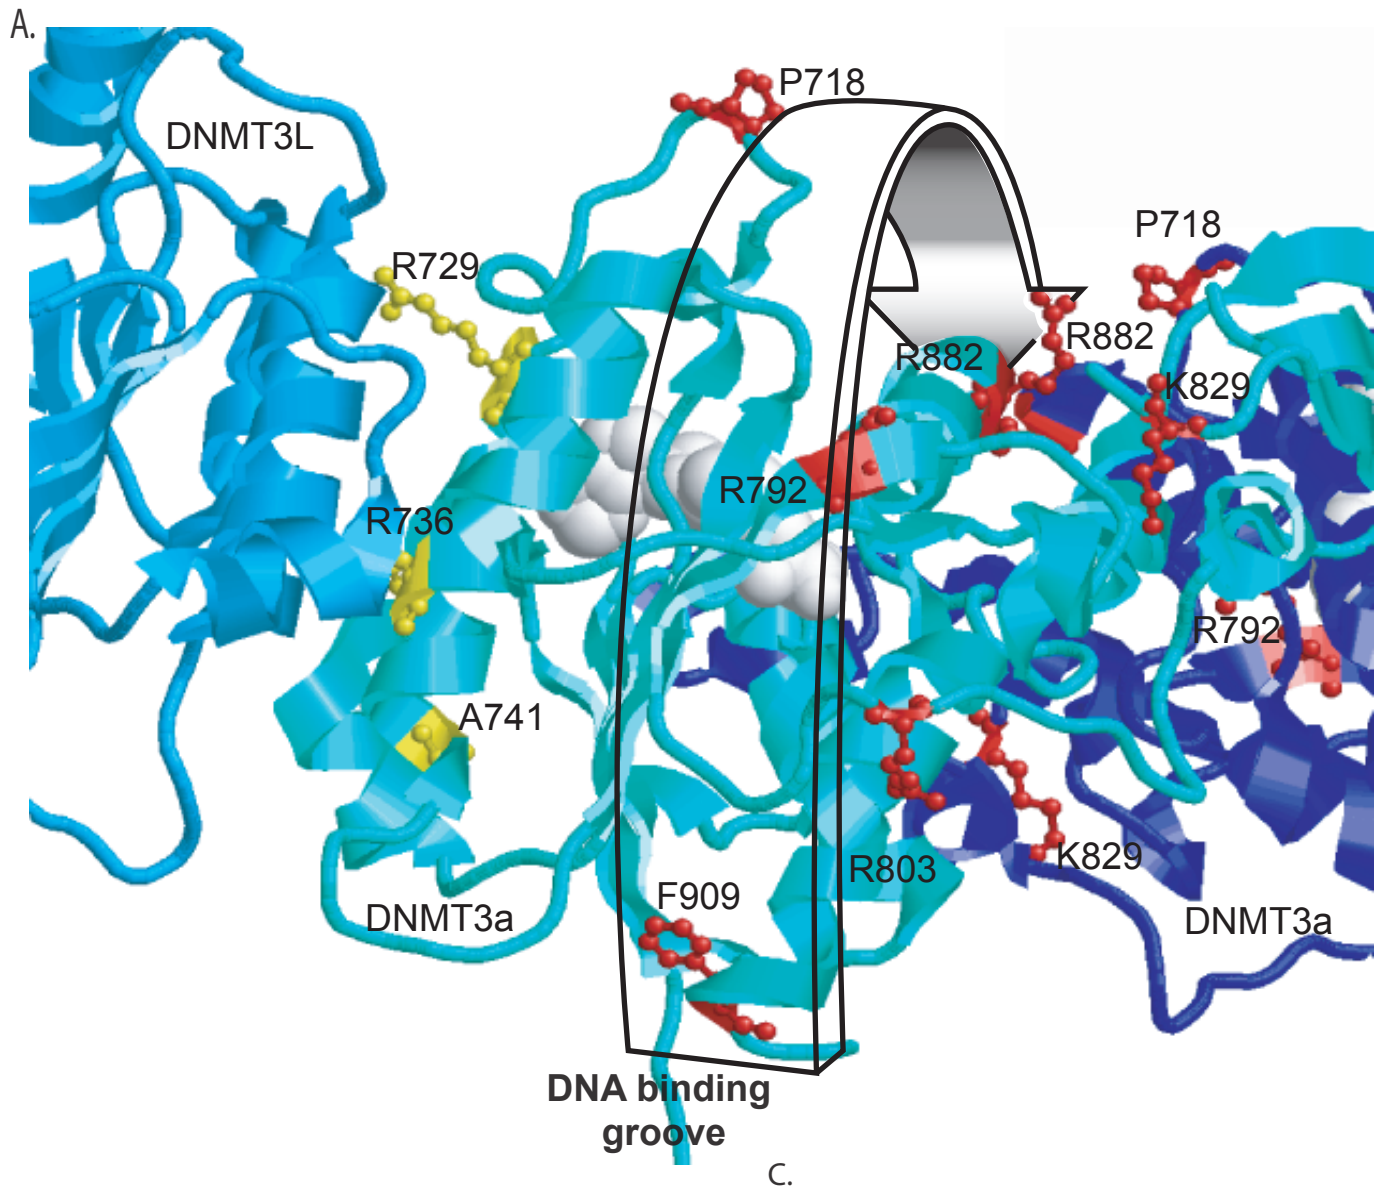

B.

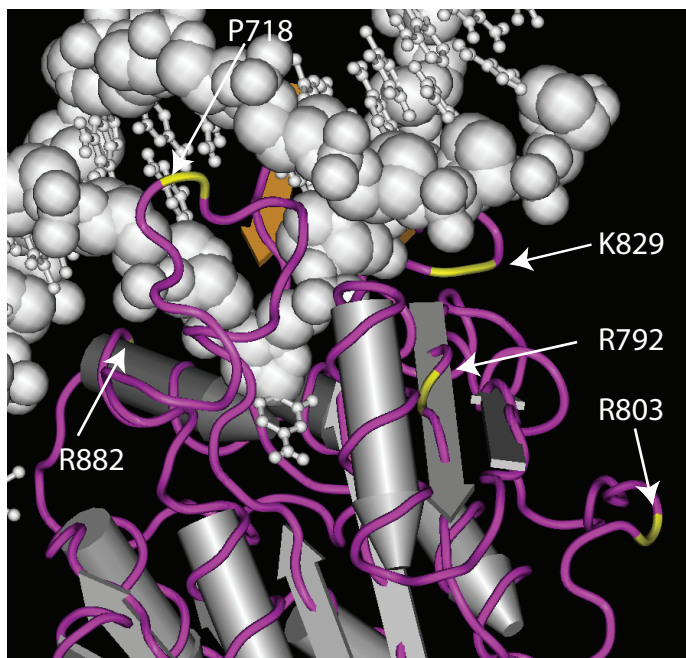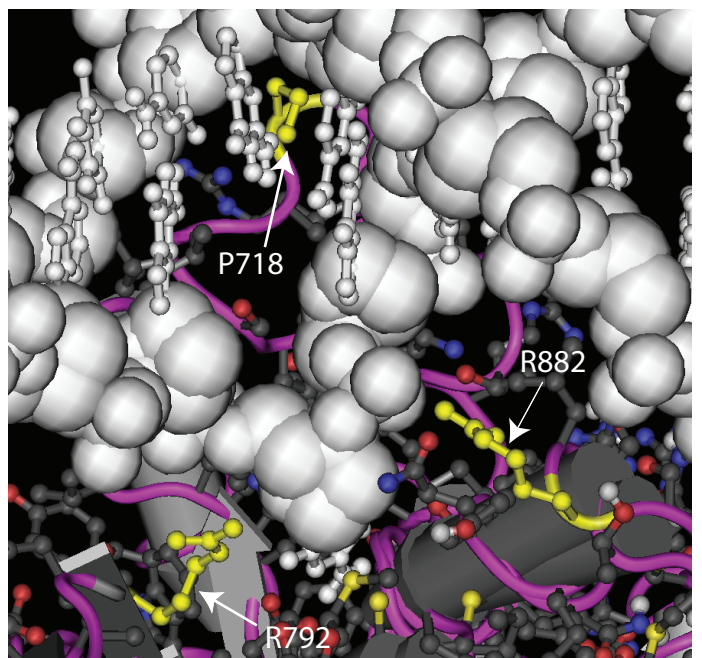



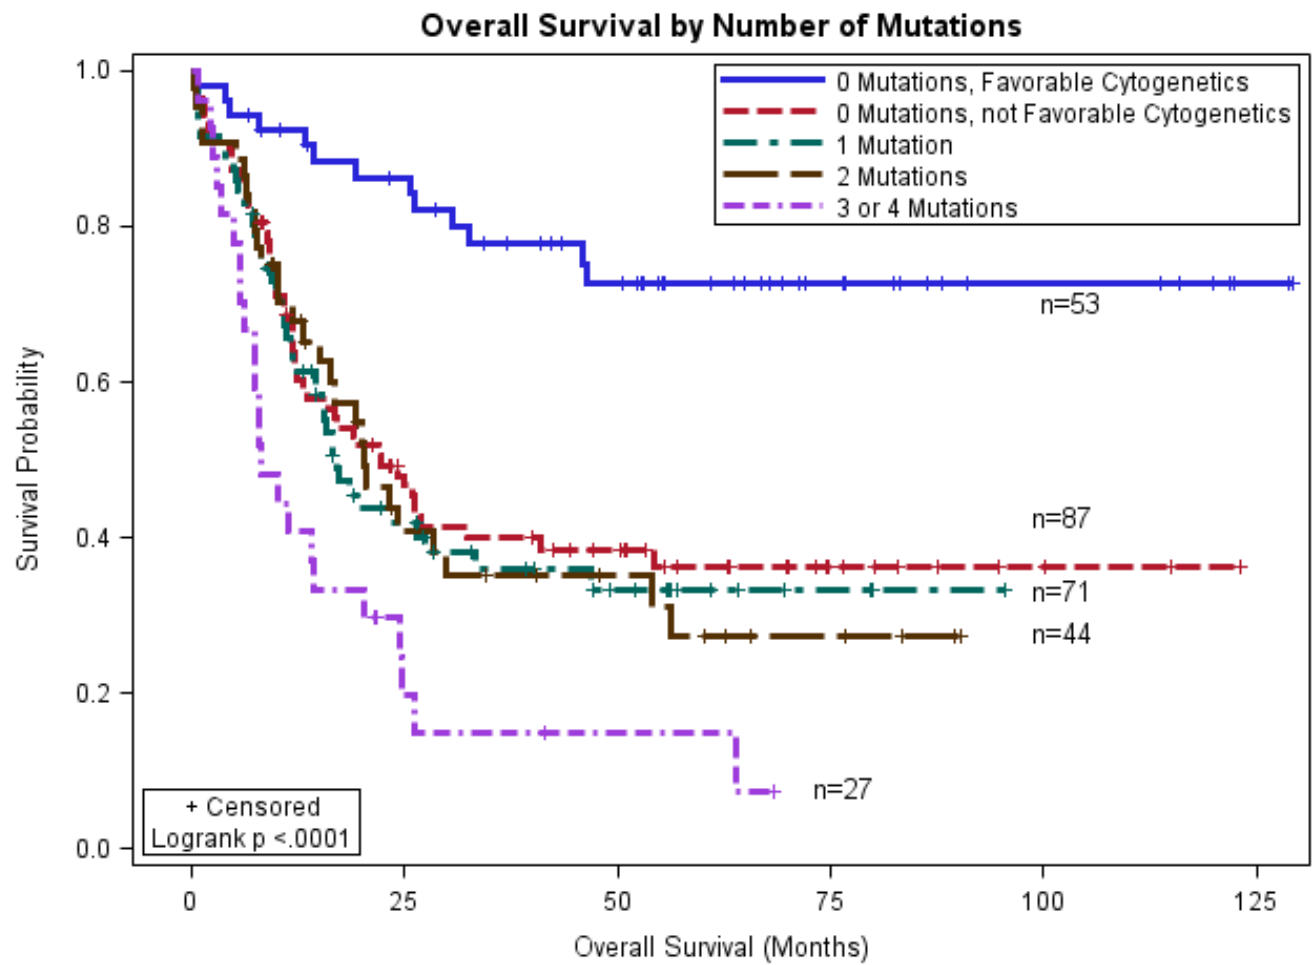

Supplementary Figure 17.

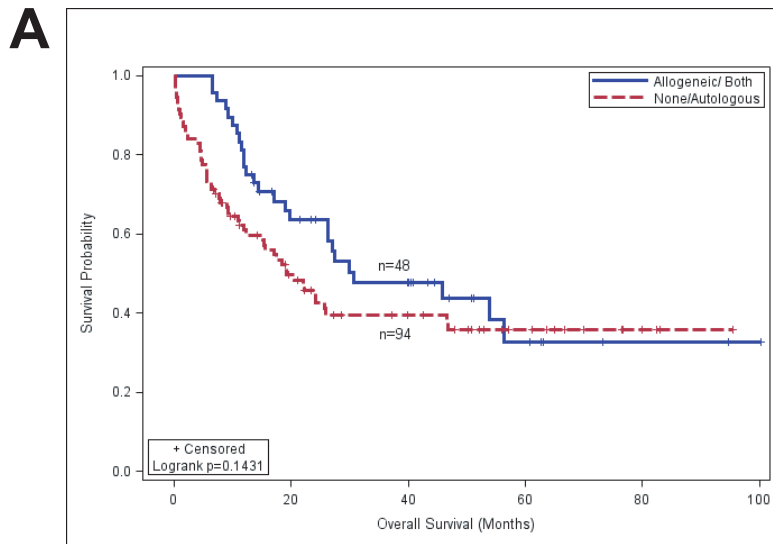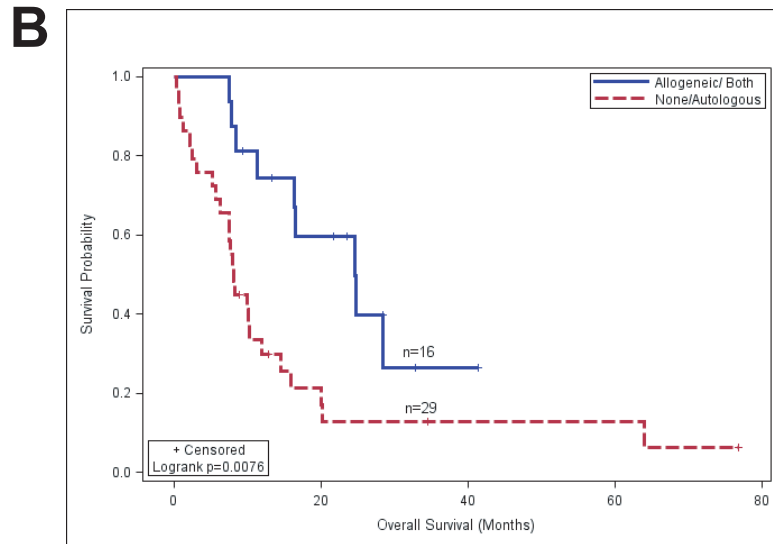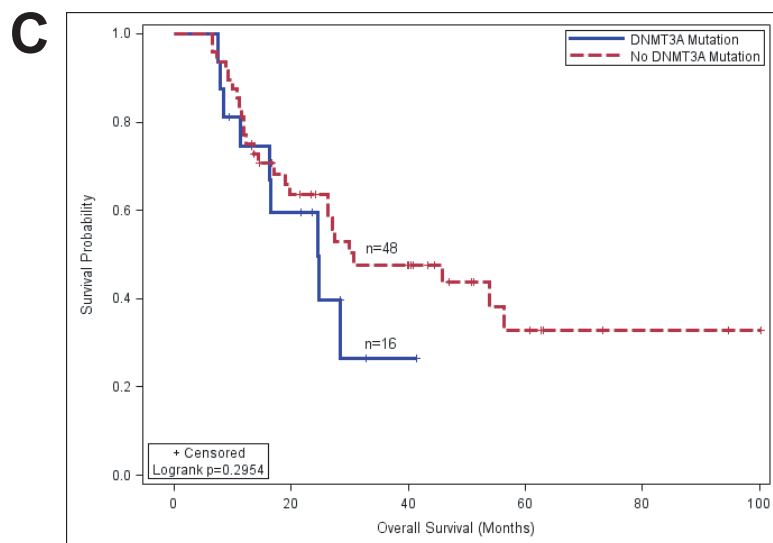

Supplementary Figure 18.





|          |    |   |   |    |           |  |    |    |    |       |      |      |        |          |  |     |             |  |        |
|----------|----|---|---|----|-----------|--|----|----|----|-------|------|------|--------|----------|--|-----|-------------|--|--------|
| C-99-474 | 25 | M | W | M2 | normal    |  | 48 | NA | NA | Dead  | 9.7  | 13.1 | E30A*  | missense |  |     | D324N       |  |        |
| C-99-483 | 28 | F | W | M2 | normal    |  | 53 | NA | NA | Alive | 68.4 | 68.4 | A368D* | missense |  |     | D324N       |  | W288fs |
| C-99-508 | 55 | M | H | M2 | (8;10;21) |  | 60 | NA | NA | Alive | 69.5 | 69.5 |        |          |  |     |             |  |        |
| C-99-550 | 38 | M | W | M4 | inv(16)   |  | 45 | NA | NA | Alive | 71.2 | 71.2 |        |          |  |     |             |  |        |
| C-99-627 | 38 | M | W | M2 | (8;21)    |  | 60 | NA | NA | Dead  | 5.1  | 13.5 |        |          |  |     |             |  |        |
| C-99-67  | 35 | F | W | M1 | normal    |  | 76 | NA | NA | Dead  | 47.7 | 54.3 |        |          |  |     |             |  |        |
| C-99-709 | 59 | F | W | M1 | normal    |  | 75 | NA | NA | Alive | 56.9 | 56.9 |        |          |  |     |             |  |        |
| C-98-860 | 54 | M | W | M4 | normal    |  | 45 | NA | NA | Dead  | 2    | 7.3  |        |          |  | ITD |             |  |        |
| C-99-901 | 38 | F | B | M4 | (16;16)   |  | 42 | NA | NA | Alive | 47.2 | 47.2 |        |          |  |     | D835Y_V571I |  |        |
| C-99-934 | 37 | F | W | M1 | normal    |  | 80 | NA | NA | Alive | 65.7 | 65.7 |        |          |  |     | D835Y       |  | W288fs |

\*novel mutation, not confirmed somatic  
 Onco data obtained

Supplementary Table 2. Summary of DNMT3A Mutations.

| Mutation            | Predicted Consequence                                                                                                       | Evidence                                                      | n  | PolyPhen <sup>#</sup> | SIFT <sup>&amp;</sup> |
|---------------------|-----------------------------------------------------------------------------------------------------------------------------|---------------------------------------------------------------|----|-----------------------|-----------------------|
| R882H               | missense                                                                                                                    | Prediction based on NM_022552.2                               | 27 | benign                | deleterious           |
| R882C               | missense                                                                                                                    | Prediction based on NM_022552.2                               | 7  | probably damaging     | deleterious           |
| R882P               | missense                                                                                                                    | Prediction based on NM_022552.2                               | 2  | probably damaging     | deleterious           |
| R882S               | missense                                                                                                                    | Prediction based on NM_022552.2                               | 1  | probably damaging     | deleterious           |
| R803S               | missense                                                                                                                    | Prediction based on NM_022552.2                               | 1  | probably damaging     | no prediction         |
| R792H               | missense                                                                                                                    | Prediction based on NM_022552.2                               | 1  | benign                | tolerated             |
| R736H               | missense                                                                                                                    | Prediction based on NM_022552.2                               | 1  | benign                | no prediction         |
| R729W               | missense                                                                                                                    | Prediction based on NM_022552.2                               | 1  | probably damaging     | tolerated             |
| R729Q               | missense                                                                                                                    | Prediction based on NM_022552.2                               | 1  | possibly damaging     | tolerated             |
| P904L <sup>^</sup>  | missense                                                                                                                    | Prediction based on NM_022552.2                               | 1  | possibly damaging     | deleterious           |
| P718L               | missense                                                                                                                    | Prediction based on NM_022552.2                               | 1  | probably damaging     | deleterious           |
| K841Q               | missense                                                                                                                    | Prediction based on NM_022552.2                               | 1  | benign                | no prediction         |
| K829R               | missense                                                                                                                    | Prediction based on NM_022552.2                               | 1  | possibly damaging     | deleterious           |
| K468R               | missense                                                                                                                    | Prediction based on NM_022552.2                               | 1  | benign                | tolerated             |
| F909C               | missense                                                                                                                    | Prediction based on NM_022552.2                               | 1  | probably damaging     | deleterious           |
| E30A <sup>^</sup>   | missense                                                                                                                    | Prediction based on NM_022552.2                               | 1  | benign                | deleterious           |
| A741V               | missense                                                                                                                    | Prediction based on NM_022552.2                               | 1  | benign                | deleterious           |
| A368D <sup>^</sup>  | missense                                                                                                                    | Prediction based on NM_022552.2                               | 1  | probably damaging     | deleterious           |
| M315fs <sup>*</sup> | p.M315fs <sup>*</sup>                                                                                                       | Prediction based on NM_022552.2                               | 1  | no prediction         | no prediction         |
| E616fs              | p.E616fsNLTQRFTLSQLRRGSPSGCCLSLMESLQGSWC <sup>*</sup>                                                                       | Prediction based on NM_022552.2                               | 1  | no prediction         | no prediction         |
| F827fs <sup>^</sup> | p.F827fsLAK <sup>*</sup>                                                                                                    | Prediction based on NM_022552.2                               | 1  | no prediction         | no prediction         |
| L723fs              | p.L723fsPTRALAGSSLSTASCMMRGPRRMIAPSSGSLRMWWPWALVTRGTSRDFSPTL <sup>*</sup>                                                   | Prediction based on NM_022552.2                               | 1  | no prediction         | no prediction         |
| E733fs <sup>^</sup> | p.E733fs <sup>*</sup>                                                                                                       | Prediction based on NM_022552.2                               | 1  | no prediction         | no prediction         |
| G590fs              | p.G590fsVPTGCCGGERTGPPGSRCSLITTRNLTLQRFTLSQLRRGSPSGCCLSLMESLQGSWC <sup>*</sup>                                              | Prediction based on NM_022552.2                               | 1  | no prediction         | no prediction         |
| E477 <sup>*</sup>   | nonsense                                                                                                                    | Prediction based on NM_022552.2                               | 1  | no prediction         | no prediction         |
| R598 <sup>^</sup>   | nonsense                                                                                                                    | Prediction based on NM_022552.2                               | 1  | no prediction         | no prediction         |
| Q615 <sup>*</sup>   | nonsense                                                                                                                    | Prediction based on NM_022552.2                               | 1  | no prediction         | no prediction         |
| Q515 <sup>*</sup>   | nonsense                                                                                                                    | Prediction based on NM_022552.2                               | 1  | no prediction         | no prediction         |
| E505 <sup>*</sup>   | nonsense                                                                                                                    | Prediction based on NM_022552.2                               | 1  | no prediction         | no prediction         |
| L805 <sup>^^</sup>  | nonsense                                                                                                                    | Prediction based on NM_022552.2                               | 1  | no prediction         | no prediction         |
| e21+2               | mutation at donor splice site at 3' end of exon 21; causes p.R803fsSSAK <sup>*</sup>                                        | RT-PCR indicates skipping of exon21 (fusion of exon 20 to 22) | 1  | no prediction         | no prediction         |
| e15+2               | mutation at donor splice site at 3' end of exon 15; causes p.D618fsRVLGLGRLELPWLSLGGCA <sup>*</sup>                         | RT-PCR confirms intron 15 retention                           | 1  | no prediction         | no prediction         |
| L773-e18+5          | deletion at L773 also deletes splice donor site; causes p.L773fsRQQPWFGQLTNGFYLGLLHPVSSALWSWGLVTSALQGACLGPRLPG <sup>*</sup> | Predicted based on intron retention                           | 1  | no prediction         | no prediction         |
| Deletion            | del chr2:24,460,563-25,807,506, removes all or part of 9 genes                                                              | Prediction based on NM_022552.2                               | 1  | no prediction         | no prediction         |

<sup>^</sup>=CALGB sample, not verified as somatic<sup>&</sup>deleterious, SIFT score <= 0.05; tolerated, SIFT score > 0.05 ([http://sift.jcvi.org/www/SIFT\\_help.html#SIFT\\_OUTPUT](http://sift.jcvi.org/www/SIFT_help.html#SIFT_OUTPUT))<sup>#</sup>version 1.13

**Supplementary Table 3. DNMT3A cDNA variant allele readcounts.**

| UPN    | DNMT3A Mutation             | WT Reads | Variant Reads | Total Reads | % Variant Reads |
|--------|-----------------------------|----------|---------------|-------------|-----------------|
| 287    | R882H                       | 5668     | 5582          | 11250       | 49.62%          |
| 142074 | R882H                       | 1833     | 1951          | 3784        | 51.56%          |
| 399253 | R882H                       | 756      | 759           | 1515        | 50.10%          |
| 452198 | R882H                       | 827      | 861           | 1688        | 51.01%          |
| 104    | R882C                       | 1368     | 1048          | 2416        | 43.38%          |
| 186481 | R882C                       | 1040     | 597           | 1637        | 36.47%          |
| 335640 | R882C                       | 1247     | 1179          | 2426        | 48.60%          |
| 816067 | R882C                       | 762      | 725           | 1487        | 48.76%          |
| 224143 | F909C                       | 95       | 125           | 220         | 56.82%          |
| 509733 | K841Q                       | 977      | 2071          | 3048        | 67.95%          |
| 245450 | R729W                       | 2227     | 2141          | 4368        | 49.02%          |
| 208027 | R803S                       | 2231     | 885           | 3116        | 28.40%          |
| 433325 | Q515*                       | 140      | 36            | 176         | 20.45%          |
| 730817 | E616fs                      | 66       | 20            | 86          | 23.26%          |
| 530962 | M315fs                      | 106      | 0             | 106         | 0.00%           |
| 933124 | L723fs                      | 2862     | 1819          | 4681        | 38.86%          |
| 113971 | G590fs <sup>^</sup>         | 603      | 6421          | 7024        | 91.42%          |
| 246634 | E477*                       | 8282     | 0             | 8282        | 0.00%           |
| 246634 | A741V                       | 86940    | 69            | 87009       | 0.08%           |
| 594368 | D618fs/e15+2 <sup>^^</sup>  | 445      | 12182         | 12627       | 96.48%          |
| 594368 | R729Q                       | 13610    | 14665         | 28275       | 51.87%          |
| 851929 | R792H                       | 32291    | 27959         | 60250       | 46.40%          |
| 851929 | R803fs/e21+2 <sup>^^^</sup> | 30030    | 36605         | 66635       | 54.93%          |
| 997292 | K468R                       | 4585     | 714           | 5299        | 13.47%          |
| 997292 | K829R                       | 14458    | 17368         | 31826       | 54.57%          |

UPN, unique patient number; WT, wildtype

<sup>^</sup>Mutant allele frequency is 91% because one copy of *DNMT3A* was deleted in this sample

<sup>^^</sup>Primer pairs designed to detect aberrantly spliced transcript only (retained intron 15)

<sup>^^^</sup>54.93% of transcripts reveal skipping of exon 21 (i.e. fusion of exon 20 to 22)

**Supplementary Table 4. DNMT3A Mutation Types.**

| <b>Reference Base</b> | <b>Variant Base</b> | <b>Total in 11 DNMT3A Mutant*<br/>genomes (%)</b> | <b>Total in 27 DNMT3A WT<br/>genomes (%)</b> |
|-----------------------|---------------------|---------------------------------------------------|----------------------------------------------|
| A                     | C                   | 773 (5.8)                                         | 1661 (6.9)                                   |
| A                     | G                   | 2403 (18.0)                                       | 4580 (19.1)                                  |
| A                     | T                   | 1703 (12.8)                                       | 3004 (12.5)                                  |
| C                     | A                   | 1856 (13.9)                                       | 3195 (13.3)                                  |
| C                     | G                   | 820 (6.2)                                         | 1488 (6.2)                                   |
| C                     | T                   | 5778 (43.3)                                       | 10074 (42.0)                                 |
|                       |                     |                                                   |                                              |
|                       | Total:              | 13,333                                            | 24,002                                       |

\*Mutations in each genome included: A741V/E477\*, E505\*, F909C, L723fs, G590fs/1.5Mb deletion, R882H (n=4), and R882C (n=2).



**Supplementary Table 5.** LC-MS quantification of deoxyribonucleoside phosphates.<sup>1</sup>

| Sample Name | DNMT3A Mutation | Peak Area (counts) |          |          | Calculated amount of analyte (fmol) |      |      | Percentage of mdCMP |                          |
|-------------|-----------------|--------------------|----------|----------|-------------------------------------|------|------|---------------------|--------------------------|
|             |                 | mdCMP              | dCMP     | dGMP     | mdCMP                               | dCMP | dGMP | (mdCMP/<br>mGMP)    | (mdCMP/<br>(mdCMP+dCMP)) |
| 246634      | A741V/E477*     | 4.92E+05           | 8.48E+06 | 1.04E+07 | 0.922                               | 21.9 | 22.8 | 4.00%               | 4.04%                    |
| 456892      | E505*           | 2.13E+05           | 3.78E+06 | 4.65E+06 | 0.463                               | 9.78 | 10.2 | 4.50%               | 4.52%                    |
| 730817      | E616fs          | 6.26E+05           | 1.00E+07 | 1.26E+07 | 1.28                                | 25.9 | 27.4 | 4.70%               | 4.71%                    |
| 224143      | F909C           | 1.00E+06           | 1.47E+07 | 1.87E+07 | 2.01                                | 37.9 | 40.7 | 4.90%               | 5.04%                    |
| 113971      | G590fs/deletion | 5.37E+05           | 7.86E+06 | 1.02E+07 | 1.1                                 | 20.3 | 22.2 | 5.00%               | 5.14%                    |
| 997292      | K829R/K468R     | 6.71E+05           | 1.06E+07 | 1.29E+07 | 1.37                                | 27.4 | 28.1 | 4.90%               | 4.76%                    |
| 509733      | K841Q           | 6.46E+05           | 8.98E+06 | 1.17E+07 | 1.32                                | 23.2 | 25.5 | 5.20%               | 5.38%                    |
| 933124      | L723fs          | 3.42E+05           | 5.69E+06 | 7.23E+06 | 0.717                               | 14.7 | 15.8 | 4.50%               | 4.65%                    |
| 369065      | L773-e18+5      | 6.92E+05           | 1.11E+07 | 1.43E+07 | 1.41                                | 28.8 | 31.1 | 4.50%               | 4.67%                    |
| 530962      | M315fs          | 5.16E+05           | 9.36E+06 | 1.16E+07 | 1.06                                | 24.2 | 25.4 | 4.20%               | 4.20%                    |
| 498463      | P718L           | 4.22E+05           | 6.81E+06 | 8.58E+06 | 0.875                               | 17.6 | 18.8 | 4.70%               | 4.74%                    |
| 433325      | Q515*           | 6.81E+05           | 1.04E+07 | 1.33E+07 | 1.39                                | 26.9 | 29   | 4.80%               | 4.91%                    |
| 957664      | Q615*           | 3.76E+05           | 7.63E+06 | 9.32E+06 | 0.784                               | 19.7 | 20.4 | 3.80%               | 3.83%                    |
| 594368      | R729Q/e15+2     | 4.45E+05           | 6.74E+06 | 8.49E+06 | 0.92                                | 17.4 | 18.6 | 4.90%               | 5.02%                    |
| 245450      | R729W           | 4.46E+05           | 7.16E+06 | 9.12E+06 | 0.662                               | 18.5 | 19.9 | 3.30%               | 3.45%                    |
| 294154      | R736H           | 2.34E+05           | 4.32E+06 | 5.18E+06 | 0.81                                | 19.9 | 18.8 | 4.30%               | 3.91%                    |
| 851929      | R792H/e21+2     | 1.30E+06           | 1.94E+07 | 2.57E+07 | 2.6                                 | 50.1 | 55.9 | 4.70%               | 4.93%                    |
| 208027      | R803S           | 2.14E+06           | 3.02E+07 | 3.97E+07 | 4.26                                | 77.9 | 86.2 | 4.90%               | 5.19%                    |
| 186481      | R882C           | 5.68E+05           | 9.15E+06 | 1.15E+07 | 1.16                                | 23.7 | 25.2 | 4.60%               | 4.67%                    |
| 142074      | R882H           | 1.70E+06           | 2.72E+07 | 2.59E+07 | 3.95                                | 74.9 | 81.3 | 4.90%               | 5.01%                    |
| 375182      | R882H           | 5.01E+06           | 7.16E+07 | 8.81E+07 | 11.6                                | 197  | 277  | 4.20%               | 5.56%                    |
| 431799      | R882H           | 9.37E+05           | 1.57E+07 | 1.58E+07 | 2.19                                | 43.2 | 49.8 | 4.40%               | 4.82%                    |
| 452198      | R882H           | 1.00E+06           | 1.73E+07 | 1.72E+07 | 2.34                                | 47.6 | 54   | 4.30%               | 4.69%                    |
| 721214      | R882H           | 1.12E+06           | 1.88E+07 | 1.67E+07 | 2.61                                | 51.9 | 52.5 | 5.00%               | 4.79%                    |
| 737451      | R882H           | 1.33E+06           | 2.12E+07 | 2.15E+07 | 3.09                                | 58.4 | 67.5 | 4.60%               | 5.03%                    |
| 740266      | R882H           | 4.66E+06           | 6.51E+07 | 7.38E+07 | 10.8                                | 179  | 232  | 4.70%               | 5.69%                    |
| 817156      | R882H           | 4.04E+06           | 5.83E+07 | 6.94E+07 | 9.34                                | 161  | 218  | 4.30%               | 5.48%                    |
| 869922      | R882H           | 3.50E+05           | 5.98E+06 | 5.55E+06 | 0.839                               | 16.4 | 17.5 | 4.80%               | 4.87%                    |
| 399253      | R882H           | 5.30E+05           | 8.22E+06 | 1.06E+07 | 1.09                                | 21.3 | 23.2 | 4.70%               | 4.87%                    |
| 807615      | R882H           | 6.40E+05           | 1.03E+07 | 1.35E+07 | 1.3                                 | 26.7 | 29.4 | 4.40%               | 4.64%                    |
| 103342      | Wild Type       | 1.67E+06           | 2.63E+07 | 2.81E+07 | 3.89                                | 72.5 | 88.3 | 4.40%               | 5.09%                    |
| 179223      | Wild Type       | 3.11E+06           | 4.46E+07 | 5.38E+07 | 7.21                                | 123  | 169  | 4.30%               | 5.54%                    |
| 329614      | Wild Type       | 7.34E+05           | 1.20E+07 | 1.03E+07 | 1.72                                | 33   | 32.4 | 5.30%               | 4.95%                    |
| 804168      | Wild Type       | 7.13E+06           | 8.93E+07 | 1.08E+08 | 16.5                                | 246  | 339  | 4.90%               | 6.29%                    |
| 804168      | Wild Type       | 1.76E+06           | 2.69E+07 | 2.78E+07 | 4.1                                 | 74   | 87.3 | 4.70%               | 5.25%                    |
| 906708      | Wild Type       | 6.93E+06           | 8.66E+07 | 1.07E+08 | 16                                  | 238  | 337  | 4.70%               | 6.30%                    |
| 907786      | Wild Type       | 6.84E+05           | 1.18E+07 | 1.14E+07 | 1.61                                | 32.6 | 35.9 | 4.50%               | 4.71%                    |
| 982009      | Wild Type       | 3.00E+06           | 4.61E+07 | 5.22E+07 | 6.95                                | 127  | 164  | 4.20%               | 5.19%                    |
| 380949      | Wild Type       | 5.61E+05           | 9.60E+06 | 1.24E+07 | 1.15                                | 24.8 | 27   | 4.30%               | 4.43%                    |
| 418499      | Wild Type       | 6.44E+05           | 1.00E+07 | 1.36E+07 | 1.31                                | 25.9 | 29.7 | 4.40%               | 4.81%                    |

|                        |           |          |          |          |       |      |      |       |       |
|------------------------|-----------|----------|----------|----------|-------|------|------|-------|-------|
| 445045                 | Wild Type | 4.00E+05 | 6.53E+06 | 8.33E+06 | 0.832 | 16.9 | 18.2 | 4.60% | 4.69% |
| 545259                 | Wild Type | 1.05E+06 | 1.68E+07 | 2.24E+07 | 2.12  | 43.4 | 48.7 | 4.40% | 4.66% |
| 868231                 | Wild Type | 6.50E+05 | 9.71E+06 | 1.29E+07 | 1.32  | 25.1 | 28.1 | 4.70% | 5.00% |
| 311636                 | Wild Type | 1.16E+06 | 1.99E+07 | 2.49E+07 | 3.92  | 91.5 | 90.2 | 4.30% | 4.11% |
| 103342                 | Wild Type | 7.03E+05 | 1.13E+07 | 1.42E+07 | 1.43  | 29.2 | 31   | 4.60% | 4.67% |
| 179223                 | Wild Type | 8.90E+05 | 1.48E+07 | 1.91E+07 | 1.8   | 38.2 | 41.5 | 4.30% | 4.50% |
| 329614                 | Wild Type | 6.40E+05 | 9.64E+06 | 1.28E+07 | 1.3   | 24.9 | 27.8 | 4.70% | 4.96% |
| 573988                 | Wild Type | 9.81E+05 | 1.54E+07 | 1.99E+07 | 1.97  | 39.8 | 43.3 | 4.50% | 4.72% |
| 804168                 | Wild Type | 6.17E+05 | 1.02E+07 | 1.25E+07 | 1.26  | 26.3 | 27.3 | 4.60% | 4.57% |
| 804168                 | Wild Type | 7.97E+05 | 1.28E+07 | 1.60E+07 | 1.61  | 33.1 | 34.9 | 4.60% | 4.64% |
| 906708                 | Wild Type | 7.64E+05 | 1.19E+07 | 1.52E+07 | 1.55  | 30.8 | 33   | 4.70% | 4.79% |
| 907786                 | Wild Type | 1.02E+06 | 1.83E+07 | 2.32E+07 | 3.46  | 84.2 | 84   | 4.10% | 3.95% |
| 982009                 | Wild Type | 5.45E+05 | 9.11E+06 | 1.10E+07 | 1.12  | 23.5 | 24.1 | 4.60% | 4.55% |
| CONTROL 1 <sup>2</sup> | Control   | 1.08E+06 | 1.79E+07 | 2.45E+07 | 2.17  | 46.1 | 53.3 | 4.10% | 4.50% |
| CONTROL 2 <sup>2</sup> | Control   | 1.16E+06 | 1.92E+07 | 2.44E+07 | 2.33  | 49.7 | 53.1 | 4.40% | 4.48% |
| CONTROL 3 <sup>2</sup> | Control   | 1.54E+06 | 2.47E+07 | 3.46E+07 | 3.07  | 63.9 | 75.2 | 4.10% | 4.58% |
| CONTROL 4 <sup>2</sup> | Control   | 8.30E+05 | 1.47E+07 | 1.84E+07 | 2.82  | 67.6 | 66.7 | 4.20% | 4.00% |

<sup>1</sup> Determined from 3.5-5 ug DNA with 23% of total hydrolysate analyzed.

<sup>2</sup> The control samples were derived from a single pool of genomic DNA derived from the spleens of 6 young C57Bl/6 male mice. The same control sample was run in the assay 4 independent times.









|                              |           |           |       |       |       |       |       |      |      |       |      |      |              |              |
|------------------------------|-----------|-----------|-------|-------|-------|-------|-------|------|------|-------|------|------|--------------|--------------|
| chr9                         | 97319421  | 97319470  | -0.21 | -0.18 | 0.92  | -0.19 | 0.4   | 1.35 | 1.18 | 1.01  | 1.46 | 1.04 | 0.0041273881 | 0.0669212667 |
| chr9                         | 97319536  | 97319585  | -1.29 | -0.5  | 1.34  | -1.27 | 0.41  | 2    | 1.83 | 1.69  | 2.1  | 1.69 | 0.0018200812 | 0.0518522048 |
| chr9                         | 97319621  | 97319670  | -1.67 | -0.87 | 1.46  | -1.97 | 0.08  | 1.84 | 2.04 | 1.5   | 2.36 | 1.65 | 0.0147133330 | 0.1090152438 |
| Nearby Gene: BARX1           |           |           |       |       |       |       |       |      |      |       |      |      |              |              |
| chr9                         | 95757631  | 95757680  | 0.97  | 0.13  | 0.55  | 0.67  | 0.92  | 1.94 | 1.82 | 1.11  | 2.28 | 1.23 | 0.0488090047 | 0.1875013959 |
| chr9                         | 95757756  | 95757805  | 0.82  | 0.2   | 0.44  | 0.88  | 1.45  | 2.31 | 2.16 | 1.1   | 2.86 | 1.5  | 0.0266403692 | 0.1412712961 |
| chr9                         | 95757841  | 95757890  | 0.52  | -0.67 | -0.15 | 0.65  | 0.81  | 2.56 | 2.21 | 0.5   | 2.92 | 1.41 | 0.0057560996 | 0.0752969181 |
| chr9                         | 95757931  | 95757980  | 0.04  | -1.12 | -0.57 | 0.37  | 0.7   | 2.58 | 2.62 | 0.61  | 2.98 | 1.35 | 0.0086760473 | 0.0881463789 |
| Nearby Gene: FOXB2           |           |           |       |       |       |       |       |      |      |       |      |      |              |              |
| chr9                         | 78824325  | 78824374  | 0.45  | -0.64 | 0.61  | 1.29  | 1.64  | 2.83 | 3.79 | 0.08  | 3.58 | 3.89 | 0.0354815614 | 0.1610442364 |
| chr9                         | 78824405  | 78824454  | -0.02 | -0.39 | -0.14 | 1.98  | 1.55  | 2.33 | 3.68 | 1.53  | 3.93 | 3.84 | 0.0068540748 | 0.0803580119 |
| chr9                         | 78824505  | 78824554  | -0.32 | -0.3  | 0.57  | 1.6   | 1.02  | 2.04 | 3.66 | 0.76  | 3.59 | 3.59 | 0.0070456501 | 0.0812079795 |
| chr9                         | 78824590  | 78824639  | -0.13 | -0.4  | 0.15  | 0.51  | 0.64  | 1.73 | 3.03 | -0.31 | 1.92 | 3.62 | 0.0251985101 | 0.1378673103 |
| Nearby Gene: ENSG00000175223 |           |           |       |       |       |       |       |      |      |       |      |      |              |              |
| chr9                         | 132297475 | 132297524 | 0.99  | -0.05 | -0.13 | 1.55  | 1.01  | 1.85 | 2.1  | 0.68  | 2.92 | 2.19 | 0.0007261527 | 0.0405763694 |
| chr9                         | 132297575 | 132297624 | 1.22  | 0.14  | -0.12 | 1.76  | 0.22  | 1.84 | 2.06 | 0.68  | 3.07 | 1.79 | 0.0002305414 | 0.0313904582 |
| chr9                         | 132297680 | 132297729 | 0.93  | 0.11  | -0.4  | 1.58  | 0.58  | 1.86 | 2.83 | 1.23  | 3.24 | 2.11 | 0.0002879063 | 0.0327336328 |
| chr9                         | 132297775 | 132297824 | 1.01  | 0.28  | -0.03 | 1.55  | 0.32  | 1.4  | 1.61 | 1.21  | 2.86 | 1.66 | 0.0076302276 | 0.0836980152 |
| Nearby Gene: COL27A1         |           |           |       |       |       |       |       |      |      |       |      |      |              |              |
| chr9                         | 115958762 | 115958811 | 0.25  | 0.34  | -0.23 | 0.55  | 2.18  | 2.09 | 2.49 | -0.37 | 2.71 | 2.78 | 0.0069430523 | 0.0808144037 |
| chr9                         | 115958962 | 115959011 | 0.46  | 0.88  | 0.1   | 0.85  | 2.37  | 2.76 | 2.73 | 0.11  | 2.72 | 3.12 | 0.0002320387 | 0.0314543152 |
| chr9                         | 115959072 | 115959121 | 0.22  | 0.67  | -0.03 | 0.43  | 1.91  | 2.33 | 2.36 | -0.02 | 2.18 | 2.44 | 0.0093213118 | 0.0907364385 |
| chr9                         | 115959252 | 115959301 | 0.22  | 0.43  | -0.18 | -0.17 | 0.58  | 1.17 | 1.23 | 0.35  | 1.62 | 1.51 | 0.0103665029 | 0.0946516482 |
| Nearby Gene: CLU             |           |           |       |       |       |       |       |      |      |       |      |      |              |              |
| chr8                         | 27505603  | 27505652  | -1.78 | 0.5   | 0.72  | -0.14 | 0.73  | 1.51 | 2.23 | 0.03  | 1.44 | 1.07 | 0.0092978575 | 0.0906392039 |
| chr8                         | 27505708  | 27505757  | -0.56 | 0.68  | 0.89  | 0.42  | 1.44  | 1.69 | 2.42 | 0.4   | 1.77 | 1.72 | 0.0001896509 | 0.0302738033 |
| chr8                         | 27505788  | 27505837  | -0.12 | 0.31  | 0.84  | 0.45  | 2.34  | 2.7  | 2.92 | -0.35 | 2.07 | 3.07 | 0.0001311825 | 0.0285641142 |
| chr8                         | 27505903  | 27505952  | -0.36 | -0.02 | 0.35  | 0.01  | 1.46  | 1.65 | 2.37 | -0.59 | 1.36 | 2.35 | 0.0010230263 | 0.0440599858 |
| Nearby Gene: NPM2            |           |           |       |       |       |       |       |      |      |       |      |      |              |              |
| chr8                         | 21938903  | 21938952  | 1.43  | 1.33  | 1.26  | 0.82  | 1.9   | 2.28 | 2.52 | 2.24  | 2.96 | 2.53 | 0.0165312248 | 0.1145042582 |
| chr8                         | 21939003  | 21939052  | -0.17 | 1.19  | 0.36  | -0.72 | 0.12  | 2.22 | 2.49 | 2.44  | 2.8  | 2.16 | 0.0028748506 | 0.0594420235 |
| chr8                         | 21939103  | 21939152  | -0.04 | 1.2   | 0.61  | -0.52 | 0.12  | 1.81 | 2.01 | 2.32  | 2.47 | 2.14 | 0.0006874577 | 0.0400356225 |
| chr8                         | 21939228  | 21939277  | -0.18 | 1.2   | 0.39  | -0.91 | -0.2  | 1.67 | 2.19 | 2.4   | 2.96 | 2    | 0.0146423963 | 0.1088185727 |
| Nearby Gene: C6orf222        |           |           |       |       |       |       |       |      |      |       |      |      |              |              |
| chr6                         | 36416441  | 36416490  | -0.41 | 0.37  | 0.83  | 0.03  | 1     | 1.21 | 1.31 | 1.62  | 2.02 | 1.18 | 0.0002198648 | 0.0310517649 |
| chr6                         | 36416545  | 36416594  | -0.29 | 0.47  | 0.73  | 0.18  | 0.87  | 1.26 | 1.55 | 1.38  | 1.7  | 1.25 | 0.0004619193 | 0.0358791634 |
| chr6                         | 36416661  | 36416710  | 0.19  | 0.83  | 0.47  | 0.92  | 1.72  | 1.91 | 2.22 | 1.09  | 2.48 | 1.56 | 0.0015982898 | 0.0497516614 |
| chr6                         | 36416741  | 36416790  | -0.05 | 0.35  | 0.77  | 0.07  | 1.9   | 2.23 | 2.28 | 0.98  | 2.64 | 1.74 | 0.0133617698 | 0.1047714610 |
| Nearby Gene: PRRT1           |           |           |       |       |       |       |       |      |      |       |      |      |              |              |
| chr6                         | 32226671  | 32226720  | 2.52  | 1.2   | 0.15  | 0.82  | 0.94  | 2.48 | 2.62 | 2.16  | 2.76 | 2.11 | 0.0153488841 | 0.1109523687 |
| chr6                         | 32226756  | 32226812  | 2.3   | 1.01  | 0.34  | 0.71  | 0.93  | 2.27 | 2.23 | 1.69  | 2.33 | 1.78 | 0.0008955186 | 0.0427932984 |
| chr6                         | 32226856  | 32226908  | 2.41  | 1.03  | 0.22  | 0.74  | 0.75  | 2.55 | 2.65 | 2     | 2.91 | 1.88 | 0.0060186179 | 0.0765892137 |
| chr6                         | 32226981  | 32227030  | 1.93  | 0.79  | 0.26  | 0.78  | 0.76  | 2.41 | 2.24 | 1.94  | 2.39 | 1.76 | 0.0097027496 | 0.0920988185 |
| Nearby Gene: ULBP1           |           |           |       |       |       |       |       |      |      |       |      |      |              |              |
| chr6                         | 150327160 | 150327209 | 0.71  | 0.11  | -0.06 | 0.69  | 2.75  | 2.82 | 3.92 | 0.07  | 3.24 | 3.15 | 0.0169697114 | 0.1158321272 |
| chr6                         | 150327345 | 150327394 | 1.09  | 0.46  | 0.94  | 1.2   | 2.21  | 2.72 | 3.66 | 0.38  | 2.71 | 2.99 | 0.0131370777 | 0.1040056892 |
| chr6                         | 150327435 | 150327484 | 0.86  | 0.4   | 0.05  | 0.77  | 1.55  | 1.99 | 2.79 | 0.26  | 1.83 | 2.14 | 0.0061364697 | 0.0771779637 |
| chr6                         | 150327645 | 150327694 | 0.75  | 0.59  | 0.4   | 0.92  | 2.38  | 2.32 | 3.05 | 0.26  | 2.47 | 2.82 | 0.0093164447 | 0.0907219866 |
| Nearby Gene: ENSG00000215068 |           |           |       |       |       |       |       |      |      |       |      |      |              |              |
| chr5                         | 43072970  | 43073028  | 1.74  | 1.49  | -0.71 | 2.68  | 1.53  | 2.43 | 2.32 | 1.63  | 3.16 | 2.5  | 0.0001453535 | 0.0289383717 |
| chr5                         | 43073055  | 43073104  | 1.89  | 1.66  | -0.44 | 2.8   | 1.82  | 2.6  | 2.63 | 1.98  | 3.36 | 2.84 | 0.0001881523 | 0.0302702364 |
| chr5                         | 43073175  | 43073224  | 1.95  | 1.57  | -0.97 | 3     | 1.81  | 2.77 | 2.69 | 1.84  | 3.37 | 2.98 | 0.0000698447 | 0.0251473615 |
| chr5                         | 43073385  | 43073434  | 1.46  | 0.96  | -0.41 | 2.49  | 1.4   | 2.2  | 2.41 | 1.55  | 2.7  | 2.21 | 0.0164673544 | 0.1143523030 |
| Nearby Gene: IRX1            |           |           |       |       |       |       |       |      |      |       |      |      |              |              |
| chr5                         | 3652073   | 3652122   | 2.5   | 0.43  | 1.35  | 2.58  | -0.44 | 2.12 | 2.72 | 1.9   | 3.53 | 1.78 | 0.0009198570 | 0.0429657111 |
| chr5                         | 3652193   | 3652242   | 2.39  | 0.28  | 1.2   | 2.35  | -0.05 | 2.14 | 2.63 | 1.76  | 3.66 | 1.93 | 0.0010446470 | 0.0442975712 |
| chr5                         | 3652283   | 3652332   | 2.32  | 0.26  | 1.21  | 2.01  | -0.16 | 2.03 | 2.39 | 1.4   | 3.13 | 1.97 | 0.0016338293 | 0.0502068534 |
| chr5                         | 3652388   | 3652437   | 2.53  | 0.29  | 1.41  | 2.09  | 1.11  | 2.77 | 2.85 | 1.38  | 3.86 | 2.64 | 0.0035686366 | 0.0638318407 |
| Nearby Gene: unknown         |           |           |       |       |       |       |       |      |      |       |      |      |              |              |
| chr4                         | 13134714  | 13134763  | 2.3   | 0.51  | 1.38  | 1.29  | 2.54  | 3.15 | 3.18 | 1.12  | 3.44 | 3.16 | 0.0103349606 | 0.0945084158 |
| chr4                         | 13134844  | 13134900  | 2.15  | 0.88  | 1.97  | 1.97  | 3.11  | 3.39 | 3.25 | 1.74  | 4.37 | 3.48 | 0.0031711303 | 0.0613862038 |
| chr4                         | 13134939  | 13134988  | 1.95  | 1.08  | 2.04  | 2.23  | 2.68  | 3.12 | 3.23 | 2.36  | 4.44 | 3.37 | 0.0137894832 | 0.1060908963 |
| chr4                         | 13135019  | 13135068  | 1.9   | 1.26  | 1.96  | 2.23  | 2.42  | 2.84 | 2.91 | 2.23  | 4.11 | 3.09 | 0.0489419242 | 0.1877382054 |
| Nearby Gene: TBX1            |           |           |       |       |       |       |       |      |      |       |      |      |              |              |
| chr22                        | 18122226  | 18122275  | 0.86  | 0.61  | 0.64  | 0.29  | 1.77  | 2.38 | 1.84 | 0.81  | 2.72 | 1.67 | 0.0016573240 | 0.0504374125 |
| chr22                        | 18122336  | 18122385  | 0.46  | 0.07  | 0.1   | 0.07  | 1.12  | 2.09 | 1.79 | 0.77  | 2.84 | 1.67 | 0.0013914109 | 0.0479135850 |
| chr22                        | 18122431  | 18122480  | 1.72  | 1.14  | 1.28  | 1.13  | 1.2   | 3.1  | 2.47 | 1.13  | 2.94 | 1.87 | 0.0072717317 | 0.0821676269 |
| chr22                        | 18122556  | 18122605  | 0.86  | 0.39  | 0.29  | 0.33  | 1.15  | 2.08 | 1.81 | 0.86  | 2.78 | 1.33 | 0.0415461744 | 0.1735436994 |
| Nearby Gene: TBX1            |           |           |       |       |       |       |       |      |      |       |      |      |              |              |
| chr22                        | 18121556  | 18121605  | 0.74  | 0.71  | 0.74  | 0.69  | 2.22  | 2.64 | 2.61 | 1.03  | 3.25 | 2.24 | 0.0125748356 | 0.1022995251 |
| chr22                        | 18121636  | 18121685  | 0.66  | 0.59  | 0.67  | 0.49  | 1.71  | 2.53 | 2.04 | 0.75  | 2.36 | 2.17 | 0.0045601567 | 0.0691515060 |
| chr22                        | 18121751  | 18121800  | 0.99  | 0.41  | 0.6   | 0.63  | 2.36  | 3    | 2.61 | 0.83  | 3.4  | 2.18 | 0.0058966690 | 0.0759118498 |
| chr22                        | 18121831  | 18121880  | 0.54  | 0.13  | 0.01  | -0.02 | 2.09  | 3.34 | 2.74 | 0.65  | 3.17 | 1.79 | 0.0081222377 | 0.0855965578 |

|                         |           |           |       |       |       |       |       |      |      |       |      |      |              |              |
|-------------------------|-----------|-----------|-------|-------|-------|-------|-------|------|------|-------|------|------|--------------|--------------|
| Nearby Gene: AGPAT3     |           |           |       |       |       |       |       |      |      |       |      |      |              |              |
| chr21                   | 44229802  | 44229851  | 1.11  | 1.14  | 0.81  | 0.26  | 0.39  | 2.32 | 1.94 | 1.35  | 2.18 | 1.09 | 0.0078505392 | 0.0845440976 |
| chr21                   | 44230002  | 44230052  | 0.78  | 1.03  | 0.8   | 0.28  | 0.93  | 2.46 | 2.12 | 1.03  | 2.44 | 1.11 | 0.0048764703 | 0.0708818708 |
| chr21                   | 44230122  | 44230171  | 0.53  | 0.77  | 0.58  | 0.1   | 1.13  | 2.81 | 2.23 | 1.09  | 2.88 | 1.48 | 0.0411079320 | 0.1726627068 |
| chr21                   | 44230227  | 44230276  | 0.76  | 0.77  | 0.44  | 0.18  | 0.91  | 2.7  | 2.08 | 0.95  | 2.26 | 1.31 | 0.0417609084 | 0.1739718994 |
| Nearby Gene: FOXA2      |           |           |       |       |       |       |       |      |      |       |      |      |              |              |
| chr20                   | 22506351  | 22506400  | 0.46  | -0.11 | 0.49  | 1.48  | 1.01  | 2.54 | 2.52 | 1.05  | 3.39 | 1.76 | 0.0496546474 | 0.1890740458 |
| chr20                   | 22506421  | 22506470  | 0.43  | -0.39 | 0.21  | 2.03  | 1.63  | 3.97 | 4.51 | 1.15  | 4.47 | 2.46 | 0.0064444837 | 0.0785051822 |
| chr20                   | 22506521  | 22506570  | 0.29  | -0.27 | 0.17  | 1.35  | 1.55  | 2.92 | 3.64 | 1.16  | 4.31 | 2    | 0.0074075338 | 0.0827305740 |
| chr20                   | 22506651  | 22506700  | 0.46  | -0.16 | 0.45  | 1.95  | 0.65  | 2.26 | 3.19 | 1.47  | 3.3  | 1.67 | 0.0214196199 | 0.1280650507 |
| Nearby Gene: APOB       |           |           |       |       |       |       |       |      |      |       |      |      |              |              |
| chr2                    | 21121039  | 21121088  | 1.22  | 1.07  | 1.6   | 1.58  | 0.39  | 2.46 | 2.37 | 2.26  | 2.19 | 2.24 | 0.0023485435 | 0.0558305073 |
| chr2                    | 21121139  | 21121188  | 1.1   | 1.11  | 1.73  | 1.69  | 0.69  | 2.52 | 2.52 | 2.34  | 1.8  | 2.29 | 0.0016491671 | 0.0503851217 |
| chr2                    | 21121239  | 21121290  | 0.98  | 1.21  | 1.68  | 1.6   | 0.82  | 2.43 | 2.4  | 2.33  | 2.41 | 2.3  | 0.0000202059 | 0.0213691480 |
| chr2                    | 21121349  | 21121398  | 0.7   | 1.11  | 1.53  | 1.39  | 0.69  | 2.33 | 2.1  | 2.04  | 2.11 | 2.12 | 0.0006470305 | 0.0393153427 |
| Nearby Gene: uc002tfr.2 |           |           |       |       |       |       |       |      |      |       |      |      |              |              |
| chr2                    | 110575230 | 110575279 | 1.43  | 1.21  | 1.51  | 1.44  | 3.12  | 3.16 | 3.02 | 1.44  | 4.07 | 2.59 | 0.0016984282 | 0.0508071797 |
| chr2                    | 110575445 | 110575494 | 1.13  | 0.9   | 1.29  | 0.87  | 2.48  | 2.48 | 2.58 | 1.23  | 3.16 | 2.35 | 0.0000359828 | 0.0223182185 |
| chr2                    | 110575545 | 110575594 | 1.39  | 1.06  | 1.51  | 1.09  | 2.92  | 3.03 | 3.32 | 1.31  | 3.59 | 2.74 | 0.0205589723 | 0.1258414033 |
| chr2                    | 110575600 | 110575609 | 1.93  | 1.2   | 1.69  | 1.2   | 3.3   | 3.04 | 3.44 | 1.33  | 3.89 | 3.07 | 0.0192139048 | 0.1221146182 |
| Nearby Gene: TTYH1      |           |           |       |       |       |       |       |      |      |       |      |      |              |              |
| chr19                   | 59624416  | 59624465  | 0.95  | 0.42  | 0.18  | -0.08 | 1.25  | 2.07 | 1.9  | 1.45  | 2.11 | 1.57 | 0.0161084508 | 0.1132655338 |
| chr19                   | 59624491  | 59624540  | 0.83  | 0.05  | -0.18 | -0.31 | 1.34  | 2.34 | 2.13 | 1.33  | 2.28 | 1.79 | 0.0000225594 | 0.0213691480 |
| chr19                   | 59624616  | 59624665  | 0.88  | 0.07  | 0.12  | 0.02  | 1.71  | 2.35 | 2.14 | 0.88  | 2.48 | 1.93 | 0.0000286186 | 0.0218810115 |
| chr19                   | 59624716  | 59624765  | 0.96  | -0.19 | 0.08  | 0.33  | 1.41  | 2.62 | 2.39 | 1.17  | 1.99 | 1.97 | 0.0066465526 | 0.0793787427 |
| Nearby Gene: IZUMO1     |           |           |       |       |       |       |       |      |      |       |      |      |              |              |
| chr19                   | 53942052  | 53942101  | 0.15  | 1.57  | 1.37  | 0.64  | 1.1   | 2.27 | 2.16 | 1.95  | 3.41 | 0.72 | 0.0238015122 | 0.1343905321 |
| chr19                   | 53942257  | 53942306  | 0.05  | 0.95  | 1     | -0.11 | 1.17  | 2.6  | 2.16 | 1.77  | 3.17 | 0.85 | 0.0203351607 | 0.1252461043 |
| chr19                   | 53942357  | 53942406  | -0.2  | 1.04  | 1.2   | -0.06 | 0.7   | 2.5  | 2.25 | 1.95  | 0.39 | 0.99 | 0.0230340558 | 0.1324510226 |
| chr19                   | 53942462  | 53942511  | -0.04 | 0.89  | 1.02  | 0.42  | 0.7   | 1.91 | 1.64 | 1.91  | 2.52 | 0.27 | 0.0201711421 | 0.1247883421 |
| Nearby Gene: DNMT2      |           |           |       |       |       |       |       |      |      |       |      |      |              |              |
| chr19                   | 10781615  | 10781664  | 0.74  | 1.07  | 0.37  | 1.41  | 1.56  | 2.82 | 1.94 | 0.46  | 2.34 | 2.6  | 0.0104436918 | 0.0949905208 |
| chr19                   | 10781800  | 10781849  | 1.06  | 0.8   | 0.3   | 1.39  | 2.68  | 3.76 | 2.75 | 0.07  | 3.1  | 3.61 | 0.0019794536 | 0.0532309594 |
| chr19                   | 10781895  | 10781944  | 1.43  | 0.47  | 0.51  | 1.07  | 3.61  | 3.96 | 3.39 | -0.21 | 3.35 | 4.33 | 0.0107182237 | 0.0959046745 |
| chr19                   | 10781985  | 10782034  | 1.24  | 0.3   | -0.03 | 0.87  | 3.31  | 4.29 | 3.37 | -0.39 | 3.12 | 4.45 | 0.0125845738 | 0.1023343702 |
| Nearby Gene: APCDD1     |           |           |       |       |       |       |       |      |      |       |      |      |              |              |
| chr18                   | 10443676  | 10443725  | -0.49 | 1.18  | 1.03  | 0.53  | 1.17  | 2.26 | 2.07 | 1.75  | 2.23 | 1.55 | 0.0129594345 | 0.1034438143 |
| chr18                   | 10443776  | 10443825  | -0.61 | 0.9   | 0.83  | 0.13  | 1.04  | 2.1  | 1.98 | 1.42  | 1.89 | 1.25 | 0.0002289464 | 0.0313773513 |
| chr18                   | 10443861  | 10443910  | -0.72 | 1.21  | 1.02  | 0.18  | 1.21  | 2.58 | 2.59 | 2.05  | 2.83 | 1.83 | 0.0005123770 | 0.0368017065 |
| chr18                   | 10443951  | 10444000  | -0.04 | 1.19  | 1.04  | 0.49  | 1.21  | 2.36 | 1.93 | 1.72  | 1.85 | 1.98 | 0.0355867829 | 0.1612072347 |
| Nearby Gene: CSF3       |           |           |       |       |       |       |       |      |      |       |      |      |              |              |
| chr17                   | 35425946  | 35425995  | 1.55  | 1.34  | 0.58  | 0.83  | 2.16  | 2.54 | 2.6  | 1.25  | 2.91 | 2.28 | 0.0036333354 | 0.0641991607 |
| chr17                   | 35426021  | 35426070  | 1.17  | 0.65  | 0.17  | 0.48  | 2.32  | 2.37 | 2.41 | 0.6   | 2.87 | 2.23 | 0.0019360167 | 0.0528742405 |
| chr17                   | 35426241  | 35426290  | 1.23  | 1.01  | 0.27  | 0.67  | 2.29  | 2.95 | 2.82 | 1.1   | 3.38 | 2.29 | 0.0042027945 | 0.0673307722 |
| chr17                   | 35426341  | 35426390  | 1.06  | 1.12  | 0.44  | 0.95  | 2.37  | 2.86 | 2.85 | 1.16  | 3.01 | 2.29 | 0.0042983631 | 0.0678167435 |
| Nearby Gene: SNIP       |           |           |       |       |       |       |       |      |      |       |      |      |              |              |
| chr17                   | 33972266  | 33972315  | 0.12  | -0.34 | 0.52  | 0.89  | -0.74 | 0.33 | 1.08 | 1.13  | 2.4  | 1.05 | 0.0098608453 | 0.0926198011 |
| chr17                   | 33972376  | 33972425  | 0.62  | -0.65 | 0.72  | 1.46  | -1.35 | 0.27 | 1.78 | 1.2   | 3.15 | 1.31 | 0.0065953501 | 0.0791331738 |
| chr17                   | 33972476  | 33972525  | 0.58  | -0.79 | 0.74  | 1.42  | -0.81 | 0.67 | 1.86 | 1.15  | 3.39 | 1.4  | 0.0023023725 | 0.0555334433 |
| chr17                   | 33972576  | 33972625  | 0.37  | 0.27  | 0.99  | 1.12  | 0.19  | 1.07 | 1.8  | 1.18  | 3.2  | 1.52 | 0.0161858576 | 0.1134521271 |
| Nearby Gene: RPH3AL     |           |           |       |       |       |       |       |      |      |       |      |      |              |              |
| chr17                   | 184858    | 184907    | 2.09  | 1.63  | 1.38  | 0.72  | 2.44  | 2.66 | 2.44 | 2.01  | 3.24 | 3.34 | 0.0033572573 | 0.0624871971 |
| chr17                   | 184968    | 185017    | 2.29  | 1.78  | 1.56  | 0.37  | 2.88  | 3.19 | 2.94 | 2     | 2.92 | 3.52 | 0.0004248241 | 0.0351808856 |
| chr17                   | 185038    | 185087    | 2.6   | 1.95  | 1.92  | 0.22  | 4.27  | 3.9  | 3.71 | 1.89  | 4.45 | 3.82 | 0.0000596216 | 0.0242630579 |
| chr17                   | 185238    | 185287    | 2.65  | 2.26  | 2.07  | 0.4   | 3.53  | 3.36 | 3.33 | 2.34  | 4.27 | 3.49 | 0.0021703026 | 0.0546120913 |
| Nearby Gene: ISLR2      |           |           |       |       |       |       |       |      |      |       |      |      |              |              |
| chr15                   | 72212031  | 72212080  | 1.56  | 0.49  | 1.63  | 1.62  | 1.2   | 1.69 | 2.7  | 1.65  | 3.35 | 2.37 | 0.0160013025 | 0.1129409771 |
| chr15                   | 72212231  | 72212280  | 2     | -0.25 | 0.99  | 0.94  | 1.11  | 1.75 | 2.66 | 0.46  | 2.44 | 2.71 | 0.0000344585 | 0.0223182185 |
| chr15                   | 72212301  | 72212350  | 2.64  | 0.09  | 1.24  | 1.03  | 1.98  | 2.79 | 3.4  | 0.4   | 3.07 | 3.74 | 0.0011862384 | 0.0458404132 |
| chr15                   | 72212431  | 72212480  | 2.15  | -0.04 | 0.58  | 0.5   | 1.3   | 1.62 | 2.55 | 0.09  | 2.57 | 3.26 | 0.0038239668 | 0.0652622530 |
| Nearby Gene: C15orf52   |           |           |       |       |       |       |       |      |      |       |      |      |              |              |
| chr15                   | 38419153  | 38419202  | 2.07  | 1.84  | 2.01  | 1.92  | 2.84  | 3.92 | 3.67 | 1.98  | 4.36 | 2.99 | 0.0007470101 | 0.0409163596 |
| chr15                   | 38419228  | 38419277  | 2.08  | 1.76  | 1.93  | 1.93  | 4.41  | 4.24 | 3.7  | 1.65  | 4.38 | 3.26 | 0.0001816413 | 0.0301242599 |
| chr15                   | 38419358  | 38419407  | 1.88  | 1.2   | 1.41  | 1.32  | 2.82  | 4.01 | 3.03 | 1.31  | 2.36 | 3.11 | 0.0011862183 | 0.0458404132 |
| chr15                   | 38419428  | 38419477  | 1.97  | 1.34  | 1.65  | 1.85  | 3.46  | 3.82 | 3.39 | 1.39  | 3.79 | 3.43 | 0.0063010096 | 0.0779617846 |
| Nearby Gene: GSX1       |           |           |       |       |       |       |       |      |      |       |      |      |              |              |
| chr13                   | 27265514  | 27265563  | -0.44 | 0.35  | 1.64  | 2.1   | 0.24  | 1.49 | 1.85 | 1.84  | 3.26 | 1.63 | 0.0056164428 | 0.0747482530 |
| chr13                   | 27265604  | 27265653  | -0.74 | 0.38  | 1.75  | 2.44  | 0.06  | 1.7  | 2.23 | 2.26  | 3.49 | 1.68 | 0.0085014636 | 0.0873281076 |
| chr13                   | 27265704  | 27265753  | -0.37 | 0     | 1.47  | 1.81  | 0.16  | 1.42 | 1.8  | 1.82  | 3.32 | 1.33 | 0.0079207230 | 0.0847681045 |
| chr13                   | 27265879  | 27265928  | -0.87 | -0.63 | -0.1  | 0.35  | 0.45  | 1.1  | 1.32 | 0     | 1.82 | 1.71 | 0.0499376107 | 0.1895656272 |
| Nearby Gene: unknown    |           |           |       |       |       |       |       |      |      |       |      |      |              |              |
| chr12                   | 45511933  | 45511982  | 0.26  | 0.26  | 1.76  | 0.97  | 1.93  | 2.35 | 1.97 | 2.33  | 3.24 | 0.6  | 0.0204239806 | 0.1254735041 |



|                        |           |           |       |       |       |       |       |       |      |       |      |       |              |              |
|------------------------|-----------|-----------|-------|-------|-------|-------|-------|-------|------|-------|------|-------|--------------|--------------|
| chr12                  | 45512149  | 45512206  | 0.29  | 0.97  | 1.95  | 1.09  | 1.94  | 2.55  | 2.51 | 2.73  | 3.57 | 0.93  | 0.0001840632 | 0.0302236820 |
| chr12                  | 45512233  | 45512282  | 0.19  | 0.74  | 1.88  | 1.11  | 1.53  | 2.39  | 2.21 | 2.6   | 3.21 | 1.17  | 0.0003592147 | 0.0337350386 |
| chr12                  | 45512357  | 45512406  | -0.11 | 0.46  | 1.81  | 0.93  | 1.41  | 1.99  | 1.83 | 2.07  | 2.86 | 0.84  | 0.0003592147 | 0.0337350386 |
| Nearby Gene: RAB3IL1   |           |           |       |       |       |       |       |       |      |       |      |       |              |              |
| chr11                  | 61447736  | 61447785  | 0.13  | -0.14 | -0.25 | 0     | 0.77  | 1.84  | 1.38 | 0.05  | 1.35 | 1.3   | 0.0054270494 | 0.0738061329 |
| chr11                  | 61447828  | 61447877  | 0.31  | -0.24 | -0.5  | 0.35  | 0.92  | 2.38  | 2.03 | -0.36 | 1.49 | 1.99  | 0.0018267940 | 0.0519273837 |
| chr11                  | 61447922  | 61447971  | 0.78  | 0.01  | 0.13  | 0.87  | 2.19  | 2.78  | 2.51 | -0.13 | 2.6  | 2.72  | 0.0004484491 | 0.0355964912 |
| chr11                  | 61448130  | 61448179  | 0.74  | 0.13  | 0.27  | 0.33  | 1.46  | 1.98  | 2.04 | -0.12 | 2.46 | 2.22  | 0.0026066791 | 0.0576765267 |
| Nearby Gene: CDKN1C    |           |           |       |       |       |       |       |       |      |       |      |       |              |              |
| chr11                  | 2864527   | 2864576   | -0.41 | 0.56  | -0.22 | -0.96 | 0.37  | 1.89  | 2.26 | 2.24  | 2.03 | -0.02 | 0.0010718344 | 0.0446212236 |
| chr11                  | 2864612   | 2864661   | -0.24 | 0.57  | 0.09  | -0.29 | 0.35  | 1.7   | 1.9  | 1.83  | 2.22 | 0.23  | 0.0008168346 | 0.0418055105 |
| chr11                  | 2864717   | 2864766   | -0.11 | 0.72  | 0.14  | -0.61 | 0.32  | 1.88  | 2.35 | 2.07  | 2.3  | 0.07  | 0.0019641206 | 0.0530901436 |
| chr11                  | 2864817   | 2864866   | -0.04 | 0.43  | 0.16  | -0.15 | 0.26  | 1.29  | 1.48 | 1.77  | 1.65 | 0.32  | 0.0289016171 | 0.1466761197 |
| Nearby Gene: unknown   |           |           |       |       |       |       |       |       |      |       |      |       |              |              |
| chr11                  | 1980702   | 1980751   | 2.2   | 1.02  | 1.8   | 1.52  | 3.67  | 3.76  | 3.24 | 1.36  | 3.57 | 3.41  | 0.0135164140 | 0.1052450904 |
| chr11                  | 1980907   | 1980956   | 1.89  | 0.68  | 1.67  | 1.08  | 2.64  | 3.02  | 2.74 | 1.58  | 3.09 | 2.73  | 0.0117909515 | 0.0996401692 |
| Nearby Gene: C1orf113  |           |           |       |       |       |       |       |       |      |       |      |       |              |              |
| chr1                   | 36557645  | 36557694  | 0.23  | 1.08  | 0.43  | 0.78  | 0.73  | 1.96  | 1.59 | 1.69  | 1.94 | 1.28  | 0.0009331223 | 0.0431064954 |
| chr1                   | 36557820  | 36557869  | 0.26  | 1.16  | 0.54  | 1.06  | 0.91  | 2.27  | 1.89 | 1.99  | 2.88 | 1.34  | 0.0002783015 | 0.0323288240 |
| chr1                   | 36558040  | 36558089  | -0.21 | 0.71  | -0.19 | 0.49  | 0.35  | 1.79  | 1.44 | 1.44  | 1.61 | 0.96  | 0.0005530036 | 0.0376721293 |
| chr1                   | 36558130  | 36558179  | -0.04 | 0.24  | -0.37 | 0.3   | 0.06  | 1.77  | 1.39 | 1.33  | 1.96 | 0.46  | 0.0004591273 | 0.0358414892 |
| Nearby Gene: RAP1GAP   |           |           |       |       |       |       |       |       |      |       |      |       |              |              |
| chr1                   | 21817425  | 21817474  | -0.34 | 0.49  | 0.34  | 0.49  | 1.69  | 1.63  | 1.37 | 1.8   | 2.38 | 0.96  | 0.0015155013 | 0.0490639934 |
| chr1                   | 21817535  | 21817584  | -0.58 | 0.3   | 0.29  | 0.21  | 1.4   | 1.47  | 1.42 | 1.55  | 2.23 | 0.7   | 0.0012820538 | 0.0469018022 |
| chr1                   | 21817735  | 21817784  | -0.41 | 0.11  | 0.63  | 0     | 1.12  | 1.67  | 1.21 | 1.36  | 1.77 | 0.83  | 0.0122134114 | 0.1010570737 |
| chr1                   | 21817830  | 21817879  | -0.52 | 0.48  | 0.41  | 0.33  | 1.38  | 1.6   | 1.45 | 1.7   | 2.12 | 0.9   | 0.0453009527 | 0.1808836209 |
| Nearby Gene: LHX9      |           |           |       |       |       |       |       |       |      |       |      |       |              |              |
| chr1                   | 196157055 | 196157104 | 0.91  | 0.21  | 0.93  | 1.19  | 0.68  | 2.25  | 2.2  | 1.65  | 2.92 | 2.03  | 0.0283775914 | 0.1455081071 |
| chr1                   | 196157155 | 196157204 | 1.24  | 0.56  | 0.67  | 1.26  | 1.01  | 2.45  | 2.5  | 1.41  | 2.84 | 2.3   | 0.0051064138 | 0.0720895480 |
| chr1                   | 196157235 | 196157284 | -0.1  | -0.54 | -0.08 | 0.43  | 0.5   | 2.52  | 2.24 | 1     | 2.93 | 2.09  | 0.0014702246 | 0.0487155119 |
| chr1                   | 196157325 | 196157374 | 0.1   | -0.28 | 0.37  | 0.28  | 0.41  | 1.73  | 1.53 | 0.71  | 1.72 | 1.43  | 0.0388129283 | 0.1680078896 |
| Nearby Gene: RCC2      |           |           |       |       |       |       |       |       |      |       |      |       |              |              |
| chr1                   | 17639834  | 17639883  | -1    | 1.4   | -0.01 | -0.86 | -0.04 | 2.33  | 2.22 | 2.02  | 2.85 | 0.62  | 0.0149912370 | 0.1098284566 |
| chr1                   | 17639944  | 17639993  | -1.63 | 1.05  | -0.48 | -1.49 | -0.59 | 1.82  | 1.71 | 1.51  | 2.03 | -0.1  | 0.0032896266 | 0.0620475189 |
| chr1                   | 17640019  | 17640069  | -0.97 | 1.02  | -0.23 | -0.87 | 0     | 1.76  | 1.72 | 1.4   | 1.9  | 0.11  | 0.0013214695 | 0.0473770559 |
| chr1                   | 17640144  | 17640198  | -0.1  | 0.75  | 0.61  | -0.05 | 0.13  | 1.78  | 1.29 | 1.46  | 2.22 | 0.58  | 0.0270899786 | 0.1423908556 |
| Nearby Gene: LOC158381 |           |           |       |       |       |       |       |       |      |       |      |       |              |              |
| chr9                   | 35396469  | 35396518  | 1.48  | -0.3  | 1.64  | 0.87  | 2.5   | 2.45  | 2.12 | 1.67  | 2.95 | 2.54  | 0.0008004581 | 0.0415805050 |
| chr9                   | 35396679  | 35396728  | -0.01 | 0.11  | 0.83  | 0.53  | 1.41  | 2.56  | 1.49 | 0.7   | 2.42 | 1.97  | 0.0005313485 | 0.0372725758 |
| chr9                   | 35396764  | 35396813  | -0.94 | -0.03 | 0.9   | -0.74 | 0.86  | 1.85  | 1.07 | 1     | 3.03 | 1.25  | 0.0001125886 | 0.0277211424 |
| Nearby Gene: IL11RA    |           |           |       |       |       |       |       |       |      |       |      |       |              |              |
| chr9                   | 34642284  | 34642333  | 1.05  | 2.46  | 0.01  | 0.04  | 1.16  | 2.17  | 2.41 | 2.17  | 2.82 | 2.2   | 0.0101963380 | 0.0939598534 |
| chr9                   | 34642379  | 34642428  | 0.83  | 2.45  | -0.01 | 0.22  | 1.14  | 2.03  | 2.45 | 2.51  | 3.29 | 2.12  | 0.0019414002 | 0.0529047986 |
| chr9                   | 34642479  | 34642529  | 0.76  | 2.37  | 0.09  | 0.27  | 0.95  | 1.96  | 2.32 | 2.18  | 2.76 | 1.74  | 0.0037113827 | 0.0645833346 |
| Nearby Gene: SUSD1     |           |           |       |       |       |       |       |       |      |       |      |       |              |              |
| chr9                   | 113977798 | 113977847 | 1.57  | 2.06  | 1.1   | 0.85  | 2.06  | 2.95  | 2.56 | 2.27  | 3.29 | 2.71  | 0.0230009886 | 0.1323412379 |
| chr9                   | 113977908 | 113977957 | 1.49  | 1.92  | 0.96  | 0.82  | 1.61  | 2.8   | 2.37 | 2.14  | 3.31 | 2.52  | 0.0165343749 | 0.1145106088 |
| chr9                   | 113977988 | 113978037 | 1.56  | 1.64  | 0.99  | 0.55  | 1.35  | 2.45  | 2.26 | 1.93  | 2.72 | 2.17  | 0.0002392108 | 0.0316404449 |
| Nearby Gene: NKX2-6    |           |           |       |       |       |       |       |       |      |       |      |       |              |              |
| chr8                   | 23619422  | 23619471  | 1.73  | 1.42  | 0.45  | 1.94  | -0.23 | 0.87  | 2.44 | 2.43  | 3.3  | 1.75  | 0.0311838744 | 0.1517498368 |
| chr8                   | 23619537  | 23619586  | 1.72  | 1.59  | 0.68  | 1.96  | -0.62 | 1.02  | 2.45 | 2.57  | 3.13 | 1.34  | 0.0067098516 | 0.0796965187 |
| chr8                   | 23619647  | 23619696  | 1.66  | 1.38  | 0.01  | 1.84  | -0.56 | 0.97  | 2.14 | 2.36  | 3.33 | 1.59  | 0.0145115266 | 0.1083477606 |
| Nearby Gene: NUDT18    |           |           |       |       |       |       |       |       |      |       |      |       |              |              |
| chr8                   | 22021543  | 22021592  | 2.61  | 1.39  | 1.89  | 1.47  | 3.69  | 3.96  | 3.61 | 1.24  | 3.65 | 3.96  | 0.0070365264 | 0.0811911862 |
| chr8                   | 22021633  | 22021682  | 3.15  | 1.47  | 2.13  | 2     | 4.78  | 4.71  | 4.1  | 1.17  | 4.32 | 4.79  | 0.0091183478 | 0.0899397910 |
| chr8                   | 22021728  | 22021777  | 3.12  | 1.24  | 2.01  | 1.64  | 4.99  | 4.79  | 4.57 | 0.65  | 4.28 | 4.7   | 0.0349435800 | 0.1599472855 |
| Nearby Gene: OSR2      |           |           |       |       |       |       |       |       |      |       |      |       |              |              |
| chr8                   | 100030175 | 100030224 | -0.32 | -0.01 | -0.17 | 1.27  | 1.33  | 1.16  | 1.67 | 1.13  | 3.44 | 0.96  | 0.0128732449 | 0.1031992544 |
| chr8                   | 100030375 | 100030424 | 0.4   | 0.46  | 0.25  | 1.47  | 1.68  | 1.94  | 1.95 | 1.07  | 3.39 | 1.62  | 0.0221295929 | 0.1299800908 |
| chr8                   | 100030475 | 100030524 | -0.47 | -0.59 | -0.36 | 0.93  | 1.45  | 2.04  | 1.9  | 0.54  | 3.59 | 1.18  | 0.0383995346 | 0.1672012613 |
| Nearby Gene: HOXA6     |           |           |       |       |       |       |       |       |      |       |      |       |              |              |
| chr7                   | 27151647  | 27151696  | -0.7  | -0.08 | 0.35  | 0.99  | 1.19  | 1.57  | 1.56 | 0.34  | 2.55 | 1.57  | 0.0021491629 | 0.0544972362 |
| chr7                   | 27151757  | 27151806  | 0.2   | 1.49  | 2.02  | 2.5   | 4.29  | 4.09  | 3.99 | 1.12  | 4.63 | 4.25  | 0.0018085355 | 0.0517605966 |
| chr7                   | 27151847  | 27151896  | 0.1   | 1.44  | 1.89  | 2.45  | 4.22  | 4.03  | 4.19 | 1.08  | 3.99 | 3.94  | 0.0009420859 | 0.0431064954 |
| Nearby Gene: PTPRN2    |           |           |       |       |       |       |       |       |      |       |      |       |              |              |
| chr7                   | 158025177 | 158025226 | 1.63  | 0.99  | 1.52  | 1.28  | 3.71  | 3.61  | 3.26 | 1.29  | 3.92 | 3.34  | 0.0233664941 | 0.1332870006 |
| chr7                   | 158025287 | 158025336 | 1.46  | 0.83  | 1.37  | 1.04  | 3.55  | 3.17  | 2.97 | 1.21  | 3.74 | 3.17  | 0.0106254202 | 0.0955348044 |
| chr7                   | 158025372 | 158025421 | 1.7   | 1.01  | 1.43  | 1.36  | 3.61  | 3.63  | 3.17 | 1.28  | 3.83 | 3.3   | 0.0115462827 | 0.0987725691 |
| Nearby Gene: HTR1B     |           |           |       |       |       |       |       |       |      |       |      |       |              |              |
| chr6                   | 78229441  | 78229490  | -0.1  | -0.21 | 0.34  | 0.75  | -0.57 | -0.29 | 1.38 | 1.72  | 2.67 | 1.56  | 0.0004792121 | 0.0361580891 |
| chr6                   | 78229541  | 78229590  | 0.15  | -0.07 | 0.36  | 0.51  | -0.4  | -0.03 | 1.1  | 1.42  | 2.55 | 1.34  | 0.0000893211 | 0.0263635838 |

|                              |           |           |       |       |       |       |       |      |      |       |      |       |              |              |
|------------------------------|-----------|-----------|-------|-------|-------|-------|-------|------|------|-------|------|-------|--------------|--------------|
| chr6                         | 78229656  | 78229705  | 0.83  | -0.15 | 0.64  | 0.74  | 0.35  | 0.42 | 1.96 | 1.26  | 3.49 | 2.18  | 0.0017128147 | 0.0509978822 |
| Nearby Gene: unknown         |           |           |       |       |       |       |       |      |      |       |      |       |              |              |
| chr6                         | 41545616  | 41545665  | -0.76 | -0.37 | -0.26 | 1.25  | 0.18  | 1.6  | 2.3  | 0.65  | 2.8  | 1.46  | 0.0395272151 | 0.1693919346 |
| chr6                         | 41545736  | 41545785  | -0.13 | -0.09 | -0.01 | 1.6   | 1.28  | 2.37 | 2.51 | 1.03  | 3.04 | 2.52  | 0.0173791405 | 0.1169942031 |
| chr6                         | 41545936  | 41545985  | 0.05  | 0.11  | 0.04  | 1.25  | 1.3   | 2.05 | 2.31 | 1.06  | 3.03 | 2.23  | 0.0394968053 | 0.1693304506 |
| Nearby Gene: TEAD3           |           |           |       |       |       |       |       |      |      |       |      |       |              |              |
| chr6                         | 35571609  | 35571658  | -0.2  | -0.25 | -0.38 | 0.37  | 0.3   | 0.99 | 1.24 | 1.11  | 1.32 | 1.2   | 0.0051934881 | 0.0725532456 |
| chr6                         | 35571714  | 35571763  | -0.37 | -0.2  | -0.56 | 0.46  | 0.4   | 1.24 | 1.38 | 1.11  | 1.74 | 1.5   | 0.0047448225 | 0.0701493998 |
| chr6                         | 35571909  | 35571958  | 0     | 0.5   | 0.07  | 0.63  | 1.55  | 1.63 | 1.32 | 1.23  | 2.14 | 1.65  | 0.0397875704 | 0.1699284802 |
| Nearby Gene: PACSIN1         |           |           |       |       |       |       |       |      |      |       |      |       |              |              |
| chr6                         | 34590976  | 34591025  | 0.2   | 1.16  | 0.18  | 1.45  | 2.03  | 2.6  | 1.75 | 1.23  | 2.92 | 2.09  | 0.0307554934 | 0.1508081343 |
| chr6                         | 34591056  | 34591105  | 0.49  | 1.06  | 0.49  | 1.49  | 1.89  | 2.84 | 2.18 | 1.64  | 3.22 | 2.26  | 0.0012155584 | 0.0462151098 |
| chr6                         | 34591276  | 34591325  | 0.59  | 0.88  | 0.42  | 1.3   | 2.06  | 2.75 | 1.59 | 1.55  | 3.03 | 1.85  | 0.0232450953 | 0.1329638944 |
| Nearby Gene: LY6G6D          |           |           |       |       |       |       |       |      |      |       |      |       |              |              |
| chr6                         | 31791201  | 31791250  | -0.96 | 0.15  | 0.05  | 0.06  | 1.16  | 1.31 | 1.18 | 0.39  | 1.85 | 1.28  | 0.0058432291 | 0.0756531434 |
| chr6                         | 31791296  | 31791345  | -1.13 | 0.01  | -0.09 | 0.36  | 1.12  | 1.4  | 1.09 | 0.44  | 1.98 | 1.29  | 0.0049058597 | 0.0710372013 |
| chr6                         | 31791371  | 31791420  | -0.71 | 0.26  | -0.22 | 0.42  | 1.3   | 1.46 | 1.46 | 0.7   | 2.3  | 1.43  | 0.0130090607 | 0.1035870021 |
| Nearby Gene: ENSG00000178762 |           |           |       |       |       |       |       |      |      |       |      |       |              |              |
| chr6                         | 25840780  | 25840829  | 1.34  | 0.37  | 0.99  | 1.5   | 3.06  | 3.15 | 3.36 | 0.84  | 3.37 | 2.88  | 0.0274764802 | 0.1432860624 |
| chr6                         | 25840885  | 25840934  | 0.26  | -0.09 | 0.53  | 0.73  | 2.8   | 2.01 | 2.6  | 0.49  | 3.17 | 2.92  | 0.0256062292 | 0.1387917490 |
| chr6                         | 25840985  | 25841034  | 0.88  | 0.63  | 1.04  | 1.83  | 2.84  | 2.3  | 3.26 | 1.13  | 2.63 | 3.02  | 0.0454611268 | 0.1812131089 |
| Nearby Gene: FNDC1           |           |           |       |       |       |       |       |      |      |       |      |       |              |              |
| chr6                         | 159509928 | 159509977 | 2.27  | -1.12 | -0.36 | 0.07  | 0.73  | 1.8  | 1.9  | -0.91 | 3.55 | 3.29  | 0.0008140642 | 0.0417476362 |
| chr6                         | 159510018 | 159510067 | 2.25  | -0.8  | 0.08  | 0.49  | 0.76  | 1.55 | 2.05 | -0.49 | 3.21 | 3.04  | 0.0100560298 | 0.0933738394 |
| chr6                         | 159510118 | 159510167 | 2.48  | -0.68 | 0.19  | 0.35  | 0.5   | 1.34 | 1.88 | -0.39 | 3.37 | 2.95  | 0.0440965619 | 0.1786075603 |
| Nearby Gene: unknown         |           |           |       |       |       |       |       |      |      |       |      |       |              |              |
| chr5                         | 72712210  | 72712259  | 0.48  | -0.17 | 1.13  | 0.39  | -0.31 | 1.82 | 1.84 | 1.06  | 2.3  | 0.93  | 0.0144519344 | 0.1082094738 |
| chr5                         | 72712300  | 72712349  | 0.84  | 0.68  | 1.46  | 0.63  | 0.47  | 1.77 | 1.83 | 1.7   | 3.09 | 1.16  | 0.0270335684 | 0.1422417348 |
| chr5                         | 72712385  | 72712434  | 0.8   | 0.11  | 1.57  | 0.77  | 0.22  | 1.88 | 2.1  | 1.83  | 2.49 | 1.02  | 0.0027941267 | 0.0588464629 |
| Nearby Gene: SLC9A3          |           |           |       |       |       |       |       |      |      |       |      |       |              |              |
| chr5                         | 579169    | 579218    | 0.05  | 0.43  | 0.22  | 0.66  | 2.45  | 2.34 | 2.25 | 0.71  | 4.01 | 2.06  | 0.0025344599 | 0.0571715778 |
| chr5                         | 579274    | 579323    | 0.06  | 0.9   | 0.64  | 1.58  | 2.92  | 2.72 | 2.38 | 0.93  | 4    | 2.22  | 0.0082783018 | 0.0863359880 |
| chr5                         | 579379    | 579428    | -0.21 | 1.02  | 0.67  | 1.82  | 2.31  | 2.43 | 2.08 | 1.16  | 3.67 | 2.13  | 0.0076050059 | 0.0835669966 |
| Nearby Gene: unknown         |           |           |       |       |       |       |       |      |      |       |      |       |              |              |
| chr5                         | 43036303  | 43036352  | 0.13  | 0.17  | 0.81  | 0.47  | 1.92  | 2.92 | 3.54 | 1.44  | 3.8  | 3.21  | 0.0014531945 | 0.0484720005 |
| chr5                         | 43036503  | 43036552  | -0.53 | -0.75 | -0.76 | -0.34 | 0.34  | 1.15 | 3.25 | 1     | 3.12 | 2.88  | 0.0228377924 | 0.1319251660 |
| chr5                         | 43036588  | 43036637  | 1.69  | 1.75  | 2.29  | 1.19  | 2.55  | 2.81 | 3.41 | 2.25  | 3.96 | 2.97  | 0.0435878344 | 0.1776684438 |
| Nearby Gene: unknown         |           |           |       |       |       |       |       |      |      |       |      |       |              |              |
| chr5                         | 178733946 | 178733995 | 2.9   | 1.68  | 2.26  | 2.51  | 4.81  | 4.54 | 4.14 | 1.66  | 5.14 | 4.71  | 0.0363104511 | 0.1627630934 |
| chr5                         | 178734141 | 178734190 | 2.84  | 1.64  | 2.26  | 2.52  | 4.49  | 4.27 | 3.93 | 1.6   | 4.83 | 4.36  | 0.0027122089 | 0.0582893132 |
| chr5                         | 178734216 | 178734265 | 2.79  | 1.61  | 2.34  | 2.41  | 4.61  | 4.42 | 4.22 | 1.61  | 4.68 | 4.28  | 0.0018523034 | 0.0521280691 |
| Nearby Gene: ARSI            |           |           |       |       |       |       |       |      |      |       |      |       |              |              |
| chr5                         | 149655054 | 149655103 | 1.46  | 0.85  | 1.05  | 1.19  | 2.99  | 3.07 | 2.67 | 1.16  | 3.65 | 3.12  | 0.0066863691 | 0.0796065948 |
| chr5                         | 149655160 | 149655209 | 1.34  | -0.27 | 0.96  | 1.15  | 3.04  | 2.97 | 2.67 | 1.21  | 3.24 | 2.8   | 0.0002147756 | 0.0310517649 |
| chr5                         | 149655360 | 149655409 | 1.15  | 1.14  | 0.97  | 1.36  | 2.83  | 2.89 | 2.59 | 1.28  | 3.48 | 2.68  | 0.0078665489 | 0.0846002189 |
| Nearby Gene: PDGFRB          |           |           |       |       |       |       |       |      |      |       |      |       |              |              |
| chr5                         | 149519516 | 149519565 | 1.07  | 0.81  | 0.27  | 0.88  | 0.66  | 1.94 | 1.83 | 1.01  | 2.49 | 1.51  | 0.0135168686 | 0.1052450904 |
| chr5                         | 149519583 | 149519632 | 1.01  | 0.7   | 0.21  | 0.86  | 0.7   | 2.08 | 1.72 | 0.9   | 2.53 | 1.46  | 0.0022242308 | 0.0550675320 |
| chr5                         | 149519753 | 149519802 | 0.99  | 0.12  | 0.01  | 0.19  | 0.86  | 2.36 | 1.66 | 0.37  | 1.94 | 1.54  | 0.0001387833 | 0.0287413292 |
| Nearby Gene: PCDH1           |           |           |       |       |       |       |       |      |      |       |      |       |              |              |
| chr5                         | 141228882 | 141228931 | 1.62  | 1.17  | 1.26  | 1.74  | 3.59  | 3.59 | 3.03 | 1.06  | 3.62 | 3.22  | 0.0022448490 | 0.0552521466 |
| chr5                         | 141229082 | 141229131 | 1.74  | 0.99  | 1.24  | 1.42  | 3.46  | 3.28 | 2.96 | 1.08  | 3.42 | 3.13  | 0.0000020706 | 0.0197834138 |
| chr5                         | 141229192 | 141229241 | 2.03  | 1.34  | 1.49  | 1.91  | 3.76  | 3.68 | 3.4  | 1.26  | 4.12 | 3.19  | 0.0000015565 | 0.0188335181 |
| Nearby Gene: TGFB1           |           |           |       |       |       |       |       |      |      |       |      |       |              |              |
| chr5                         | 135393099 | 135393148 | 0.62  | 0.73  | -0.3  | 0.89  | 2.25  | 2.18 | 2.18 | 1.84  | 3.1  | 0.18  | 0.0046879058 | 0.0698533158 |
| chr5                         | 135393194 | 135393243 | 0.5   | 0.6   | -0.55 | 1.52  | 2.29  | 2.29 | 2.23 | 1.89  | 3.76 | 0.54  | 0.0258969730 | 0.1395261010 |
| chr5                         | 135393309 | 135393358 | 0.38  | 0.21  | -0.05 | 0.78  | 1.83  | 1.83 | 1.97 | 1.56  | 2.75 | -0.12 | 0.0199482946 | 0.1241537842 |
| Nearby Gene: LOC389328       |           |           |       |       |       |       |       |      |      |       |      |       |              |              |
| chr5                         | 134398970 | 134399019 | 0.36  | -0.56 | -0.18 | -0.58 | 1.25  | 2.6  | 1.04 | 1.14  | 2.25 | 1.01  | 0.0155665155 | 0.1116057432 |
| chr5                         | 134399100 | 134399149 | 0.29  | -0.61 | -0.4  | -0.47 | 1.55  | 2.95 | 1.52 | 0.95  | 3.06 | 1.72  | 0.0018804356 | 0.0524823446 |
| chr5                         | 134399170 | 134399219 | 0.18  | -0.63 | -0.44 | -0.6  | 0.95  | 2.45 | 1.24 | 1.06  | 2.56 | 1.28  | 0.0056867392 | 0.0750237063 |
| Nearby Gene: ZNF608          |           |           |       |       |       |       |       |      |      |       |      |       |              |              |
| chr5                         | 124108117 | 124108166 | 0.8   | 0.41  | -0.5  | -0.63 | 1.47  | 2.28 | 2.6  | 2.19  | 3.06 | -0.74 | 0.0024714003 | 0.0567775397 |
| chr5                         | 124108237 | 124108293 | 0.79  | 0.07  | -0.62 | -1.13 | 1.1   | 1.99 | 2.21 | 2.02  | 3.05 | -0.83 | 0.0034244872 | 0.0629125047 |
| chr5                         | 124108317 | 124108366 | 0.55  | 0.32  | 0     | -0.46 | 0.92  | 1.5  | 1.82 | 1.76  | 2.27 | -0.19 | 0.0020613995 | 0.0538331824 |
| Nearby Gene: IDUA            |           |           |       |       |       |       |       |      |      |       |      |       |              |              |
| chr4                         | 982083    | 982132    | 0.51  | 1.49  | 1.68  | 1.34  | 2.81  | 3.67 | 2.7  | 1.67  | 3.17 | 3.1   | 0.0353282746 | 0.1607473057 |
| chr4                         | 982201    | 982250    | 0.78  | 1.64  | 1.81  | 1.41  | 3.48  | 3.9  | 3.16 | 1.82  | 3.34 | 3.02  | 0.0017910925 | 0.0515516386 |
| chr4                         | 982283    | 982332    | 0.77  | 1.67  | 1.71  | 1.3   | 2.46  | 3.1  | 2.54 | 1.8   | 2.68 | 2.82  | 0.0005418971 | 0.0374006068 |

|                           |           |           |       |       |       |       |       |      |      |       |      |      |              |              |
|---------------------------|-----------|-----------|-------|-------|-------|-------|-------|------|------|-------|------|------|--------------|--------------|
| Nearby Gene: ITIH1        |           |           |       |       |       |       |       |      |      |       |      |      |              |              |
| chr3                      | 52798685  | 52798734  | 0.55  | 0.63  | 0.46  | 1.16  | 2.25  | 2.36 | 2.07 | 0.95  | 2.72 | 2.26 | 0.0003223193 | 0.0332828630 |
| chr3                      | 52798775  | 52798824  | 0.57  | 0.65  | 0.49  | 1.24  | 2.69  | 2.75 | 2.28 | 0.95  | 3.04 | 2.53 | 0.0082528399 | 0.0862243782 |
| chr3                      | 52798870  | 52798919  | 0.44  | 0.33  | 0.66  | 0.78  | 1.93  | 2.4  | 1.77 | 0.66  | 2.7  | 2.1  | 0.0146116669 | 0.1087061132 |
| Nearby Gene: HYAL3        |           |           |       |       |       |       |       |      |      |       |      |      |              |              |
| chr3                      | 50305754  | 50305803  | 0.85  | 0.3   | 0.7   | 0.46  | 2.02  | 2.48 | 2.25 | 1.05  | 2.68 | 2.45 | 0.0087311272 | 0.0884128597 |
| chr3                      | 50305959  | 50306009  | 1     | 0.41  | 0.93  | 0.93  | 2.9   | 3.04 | 2.63 | 1.03  | 3.15 | 1.7  | 0.0014909477 | 0.0489126461 |
| chr3                      | 50306054  | 50306103  | 0.79  | 0.38  | 0.85  | 1.06  | 2.28  | 2.48 | 2.01 | 1.17  | 2.73 | 2.37 | 0.0062509516 | 0.0777338333 |
| Nearby Gene: CPT1B        |           |           |       |       |       |       |       |      |      |       |      |      |              |              |
| chr22                     | 49363855  | 49363904  | 0.7   | 1.88  | 1.94  | 2.34  | 0.24  | 2.66 | 2.5  | 2.21  | 2.7  | 2.15 | 0.0333885548 | 0.1566403481 |
| chr22                     | 49363950  | 49364000  | 0.69  | 2.14  | 2.42  | 3.12  | -0.29 | 2.92 | 3.03 | 2.82  | 3.59 | 2.58 | 0.0065048535 | 0.0787943437 |
| chr22                     | 49364155  | 49364204  | 0.19  | 1.91  | 1.72  | 2.71  | -0.23 | 2.57 | 2.52 | 2.61  | 3.5  | 2.12 | 0.0007094593 | 0.0403855332 |
| Nearby Gene: PLA2G3       |           |           |       |       |       |       |       |      |      |       |      |      |              |              |
| chr22                     | 29866872  | 29866921  | 0.31  | 0.32  | 0.35  | -0.19 | 0.22  | 1.88 | 1.34 | 1.05  | 1.04 | 0.77 | 0.0051746871 | 0.0724740827 |
| chr22                     | 29867002  | 29867051  | 0.36  | 0.6   | 0.43  | -0.38 | 0.55  | 1.8  | 1.31 | 1.28  | 2.43 | 1.84 | 0.0079106367 | 0.0847313881 |
| chr22                     | 29867102  | 29867151  | 0.49  | 0.42  | 0.09  | -0.25 | -0.14 | 1.6  | 0.52 | 1.02  | 1.44 | 1.26 | 0.0021777147 | 0.0542712343 |
| Nearby Gene: TBX1         |           |           |       |       |       |       |       |      |      |       |      |      |              |              |
| chr22                     | 18123646  | 18123695  | 0.74  | 0.62  | 0.45  | 0.74  | 1.92  | 2.32 | 2.1  | 0.98  | 2.66 | 1.82 | 0.0036383957 | 0.0642251758 |
| chr22                     | 18123736  | 18123785  | 0.31  | 0.35  | 0.36  | -0.09 | 1.1   | 1.86 | 2.07 | 0.88  | 2.69 | 1.14 | 0.0021378563 | 0.0543795435 |
| chr22                     | 18123856  | 18123905  | 1.15  | 0.71  | 0.57  | 0.33  | 1.73  | 2.32 | 1.97 | 0.95  | 3.18 | 1.75 | 0.0010126458 | 0.0439409085 |
| Nearby Gene: COL6A2       |           |           |       |       |       |       |       |      |      |       |      |      |              |              |
| chr21                     | 46340978  | 46341027  | 1.93  | 1.46  | 1.05  | 1.32  | 3.1   | 3.34 | 3    | 1.53  | 3.88 | 2.56 | 0.0328879189 | 0.1555362110 |
| chr21                     | 46341078  | 46341127  | 1.89  | 1.43  | 1.09  | 1.21  | 2.71  | 3.09 | 2.8  | 1.55  | 3.78 | 2.25 | 0.0000311118 | 0.0218810115 |
| chr21                     | 46341173  | 46341222  | 1.97  | 1.7   | 0.91  | 1.66  | 2.91  | 3.19 | 2.99 | 1.78  | 3.84 | 2.63 | 0.0038199940 | 0.0652272403 |
| Nearby Gene: GATA5        |           |           |       |       |       |       |       |      |      |       |      |      |              |              |
| chr20                     | 60486551  | 60486600  | 1.41  | 0.2   | 0.84  | 1     | 1.76  | 3.38 | 3.62 | 0.13  | 2.61 | 3.46 | 0.0338096834 | 0.1575396261 |
| chr20                     | 60486751  | 60486800  | 0.62  | 0.04  | 0.39  | 0.42  | 0.6   | 1.4  | 1.5  | 0.59  | 1.99 | 1.84 | 0.0006111533 | 0.0386440867 |
| chr20                     | 60486926  | 60486975  | 0.75  | 0.31  | 1.03  | 0.75  | 0.56  | 1.41 | 2.28 | 0.88  | 2.8  | 2.05 | 0.0004504395 | 0.0356644438 |
| Nearby Gene: SLC32A1      |           |           |       |       |       |       |       |      |      |       |      |      |              |              |
| chr20                     | 36785134  | 36785183  | 0.59  | 0.2   | 0.21  | 0.04  | -0.49 | 0.51 | 1.37 | 1.58  | 2.6  | 1.07 | 0.0000075687 | 0.0197834138 |
| chr20                     | 36785229  | 36785278  | 0.73  | 0.45  | 0.57  | 0.08  | 0.17  | 0.89 | 1.49 | 1.39  | 2.3  | 1.53 | 0.0000104249 | 0.0206310965 |
| chr20                     | 36785319  | 36785368  | 0.78  | 0.53  | 0.69  | -0.04 | 0.01  | 0.96 | 1.42 | 1.35  | 2.3  | 1.44 | 0.0175973313 | 0.1175708403 |
| Nearby Gene: OTOF         |           |           |       |       |       |       |       |      |      |       |      |      |              |              |
| chr2                      | 26634682  | 26634731  | 1.47  | 0.24  | 0.37  | 1.57  | 1.96  | 2.72 | 2.29 | 1.39  | 3.1  | 2.46 | 0.0054914460 | 0.0741072287 |
| chr2                      | 26634902  | 26634951  | 1.56  | 0.13  | 0.37  | 0.44  | 1.86  | 2.6  | 2.17 | 0.45  | 2.55 | 2.44 | 0.0044761757 | 0.0687923722 |
| chr2                      | 26635082  | 26635131  | 1.64  | 0.28  | 0.49  | 0.99  | 2.5   | 2.65 | 2.06 | 0.86  | 2.99 | 2.66 | 0.0160967769 | 0.1132251390 |
| Nearby Gene: C2orf85      |           |           |       |       |       |       |       |      |      |       |      |      |              |              |
| chr2                      | 242458712 | 242458761 | 1.64  | 1.34  | 1.09  | 0.94  | 2.52  | 3.35 | 2.62 | 1.41  | 3.15 | 3    | 0.0031747931 | 0.0613909221 |
| chr2                      | 242458922 | 242458971 | 1.43  | 0.95  | 0.87  | 0.94  | 2.13  | 3.19 | 1.96 | 1.24  | 2.83 | 2.79 | 0.0014461593 | 0.0484129826 |
| chr2                      | 242458997 | 242459046 | 1.33  | 0.91  | 0.84  | 0.9   | 1.88  | 2.92 | 1.98 | 1.16  | 2.68 | 2.72 | 0.0066788950 | 0.0795686166 |
| Nearby Gene: LOC100131546 |           |           |       |       |       |       |       |      |      |       |      |      |              |              |
| chr2                      | 232993272 | 232993321 | 1.21  | 0.51  | 1.29  | 1.1   | 1.46  | 3    | 2.71 | 2.07  | 3.08 | 1.91 | 0.0302120808 | 0.1497100228 |
| chr2                      | 232993342 | 232993391 | 0.61  | 0.28  | 1.06  | 1.06  | 1.04  | 3.17 | 2.67 | 2.11  | 3.3  | 1.88 | 0.0054677982 | 0.0739914487 |
| chr2                      | 232993447 | 232993496 | 0.53  | 0.47  | 0.98  | 0.77  | 1.13  | 2.49 | 1.94 | 1.57  | 2.45 | 1.41 | 0.0400728598 | 0.1705209211 |
| Nearby Gene: TBR1         |           |           |       |       |       |       |       |      |      |       |      |      |              |              |
| chr2                      | 161981466 | 161981515 | -1.32 | -1.92 | -0.82 | -0.07 | -1.03 | 3.35 | 1.98 | 0.04  | 4.15 | 1.14 | 0.0029451663 | 0.0598683574 |
| chr2                      | 161981591 | 161981640 | 0.16  | -0.1  | 0.37  | 0.52  | 0.6   | 2.61 | 1.42 | -0.09 | 3.42 | 1.56 | 0.0030794340 | 0.0607191391 |
| chr2                      | 161981696 | 161981745 | 0.35  | -0.18 | 0.79  | 0.39  | 0.86  | 2.71 | 1.91 | 0.66  | 3.1  | 1.15 | 0.0245992105 | 0.1363053173 |
| Nearby Gene: LIMS2        |           |           |       |       |       |       |       |      |      |       |      |      |              |              |
| chr2                      | 128138794 | 128138843 | 0.97  | 0.48  | -0.12 | 1.6   | 1.1   | 1.74 | 2.48 | 1.22  | 3.14 | 2.42 | 0.0121290695 | 0.1007165019 |
| chr2                      | 128138919 | 128138968 | 0.97  | 0.58  | -0.01 | 1.74  | 1.23  | 1.61 | 2.59 | 1.51  | 3.55 | 2.58 | 0.0024936337 | 0.0569060378 |
| chr2                      | 128139004 | 128139053 | 0.89  | 0.5   | 0.13  | 1.48  | 0.82  | 1.19 | 2.2  | 1.19  | 2.87 | 2.24 | 0.0009301906 | 0.0431008335 |
| Nearby Gene: C19orf51     |           |           |       |       |       |       |       |      |      |       |      |      |              |              |
| chr19                     | 60362392  | 60362441  | 1.12  | 0.54  | 0.57  | 0.5   | 1.86  | 2.73 | 1.86 | 0.99  | 2.68 | 2.12 | 0.0162484972 | 0.1136487236 |
| chr19                     | 60362487  | 60362536  | 1.2   | 0.73  | 0.67  | 0.76  | 2.28  | 2.99 | 2.38 | 1.39  | 3.36 | 2.64 | 0.0024951804 | 0.0569060378 |
| chr19                     | 60362617  | 60362666  | 1.21  | 0.74  | 0.88  | 0.7   | 1.96  | 2.63 | 2.05 | 1.18  | 3.03 | 2.15 | 0.0105567498 | 0.0953291022 |
| Nearby Gene: PPP1R12C     |           |           |       |       |       |       |       |      |      |       |      |      |              |              |
| chr19                     | 60301295  | 60301344  | 1.82  | 1.82  | 0.94  | 1     | 0.83  | 2.81 | 2.29 | 1.52  | 3.41 | 2.49 | 0.0027504171 | 0.0585707722 |
| chr19                     | 60301399  | 60301448  | 1.56  | 1.64  | 0.61  | 0.93  | 0.91  | 2.52 | 2.06 | 1.29  | 3.16 | 2.21 | 0.0027504171 | 0.0585707722 |
| chr19                     | 60301477  | 60301526  | 1.65  | 1.65  | 0.59  | 0.87  | 0.94  | 2.46 | 2.16 | 1.49  | 3.45 | 2.37 | 0.0109922910 | 0.0969149072 |
| Nearby Gene: CACNG7       |           |           |       |       |       |       |       |      |      |       |      |      |              |              |
| chr19                     | 59103103  | 59103152  | 0.2   | 0.29  | -0.17 | 0.22  | 1.65  | 2.39 | 1.66 | -0.26 | 2.48 | 1.61 | 0.0009706078 | 0.0434293326 |
| chr19                     | 59103193  | 59103242  | 0.1   | 0.13  | -0.3  | 0.25  | 1.94  | 2.5  | 1.81 | -0.44 | 2.55 | 1.92 | 0.0004190321 | 0.0350917639 |
| chr19                     | 59103293  | 59103342  | -0.23 | -0.17 | -0.21 | 0.01  | 1.44  | 2.15 | 1.63 | -0.35 | 2.04 | 1.54 | 0.0008180832 | 0.0418395788 |
| Nearby Gene: LOC100129088 |           |           |       |       |       |       |       |      |      |       |      |      |              |              |
| chr19                     | 58716816  | 58716865  | 0.17  | 0.84  | 1.44  | 1     | 1.46  | 1.93 | 2.03 | 1.85  | 3.37 | 1.95 | 0.0000740376 | 0.0256044041 |
| chr19                     | 58716891  | 58716940  | 0.58  | 0.49  | 1.13  | 1     | 1.65  | 1.91 | 2.07 | 1.14  | 3.03 | 2.22 | 0.0005907333 | 0.0384487121 |
| chr19                     | 58717016  | 58717065  | 0.23  | 0.59  | 1.34  | 0.94  | 1.06  | 1.35 | 1.72 | 1.8   | 3.02 | 1.8  | 0.0133771334 | 0.1048241393 |
| Nearby Gene: DIRAS1       |           |           |       |       |       |       |       |      |      |       |      |      |              |              |
| chr19                     | 2674879   | 2674928   | 0.72  | 0.88  | 0.46  | 1.32  | 1.9   | 3.27 | 2.32 | 1.51  | 2.62 | 2.7  | 0.0061540309 | 0.0772430351 |

|                         |          |          |       |       |       |       |       |      |      |       |      |       |               |              |
|-------------------------|----------|----------|-------|-------|-------|-------|-------|------|------|-------|------|-------|---------------|--------------|
| chr19                   | 2674964  | 2675013  | 0.91  | 0.85  | 0.53  | 1.27  | 2.05  | 3.39 | 2.2  | 1.39  | 2.16 | 2.7   | 0.0125331265  | 0.1021777837 |
| chr19                   | 2675089  | 2675138  | 1.25  | 0.83  | 0.76  | 0.99  | 2.04  | 3.35 | 2.03 | 1.16  | 2.41 | 2.59  | 0.0146408304  | 0.1088182618 |
| Nearby Gene: uc010dsz.1 |          |          |       |       |       |       |       |      |      |       |      |       |               |              |
| chr19                   | 2283219  | 2283268  | 0.64  | 1.3   | 0.37  | 0.26  | 1.22  | 1.59 | 0.95 | 1.78  | 2.19 | 2.7   | 0.0009001752  | 0.0428303139 |
| chr19                   | 2283299  | 2283348  | 0.35  | 1.69  | 0.16  | -0.01 | 1.32  | 1.66 | 0.57 | 2.22  | 2.15 | 2.81  | 0.0003755118  | 0.0340057473 |
| chr19                   | 2283519  | 2283568  | 0.45  | 1.79  | 0.42  | -0.14 | 1.06  | 1.64 | 0.91 | 2.11  | 2.35 | 2.97  | 0.0128919096  | 0.1032492927 |
| Nearby Gene: MEF2B      |          |          |       |       |       |       |       |      |      |       |      |       |               |              |
| chr19                   | 19142349 | 19142398 | 0.29  | 2.12  | 0.22  | -0.15 | 1.81  | 2.3  | 2.53 | 2.44  | 3.44 | 0.47  | 0.0143049771  | 0.1077719674 |
| chr19                   | 19142448 | 19142497 | 0.06  | 2.23  | -0.04 | -0.38 | 1.65  | 2.53 | 2.81 | 2.7   | 3.99 | 0.58  | 0.0254015586  | 0.1382852101 |
| chr19                   | 19142533 | 19142582 | -0.01 | 1.99  | 0.08  | 0.1   | 1.01  | 2.31 | 2.31 | 2.56  | 3.16 | 0.7   | 0.0358760778  | 0.1618232425 |
| Nearby Gene: CTDP1      |          |          |       |       |       |       |       |      |      |       |      |       |               |              |
| chr18                   | 75541938 | 75541987 | 0.8   | 1.06  | 0.11  | 1.9   | 1.48  | 3.07 | 1.67 | 0.88  | 2.67 | 2.27  | 0.0055405418  | 0.0744029893 |
| chr18                   | 75542068 | 75542117 | 0.61  | 1.07  | -0.14 | 1.78  | 1.79  | 3.65 | 2.12 | 0.72  | 2.76 | 2.29  | 0.0026305038  | 0.0577959917 |
| chr18                   | 75542133 | 75542182 | 0.75  | 1.18  | -0.11 | 1.74  | 1.67  | 3.63 | 2.11 | 0.66  | 2.08 | 2.07  | 0.0040443116  | 0.0664470157 |
| Nearby Gene: SEPT9      |          |          |       |       |       |       |       |      |      |       |      |       |               |              |
| chr17                   | 72831246 | 72831295 | 2.95  | 1.26  | 0.74  | 1.58  | 3.36  | 4.51 | 3.61 | 1.14  | 4.16 | 4.01  | 0.0139211251  | 0.1064923201 |
| chr17                   | 72831376 | 72831425 | 2.79  | 1.19  | 0.75  | 1.48  | 2.63  | 3.99 | 3    | 1.09  | 3.26 | 3.63  | 0.0110137644  | 0.0969736202 |
| chr17                   | 72831446 | 72831495 | 2.53  | 1.18  | 0.54  | 1.49  | 2.6   | 3.38 | 2.76 | 0.98  | 3.65 | 3.32  | 0.0125444953  | 0.1022095307 |
| Nearby Gene: TMEM102    |          |          |       |       |       |       |       |      |      |       |      |       |               |              |
| chr17                   | 7279267  | 7279316  | -0.65 | 1.53  | 0.37  | -0.47 | -0.16 | 2.07 | 2.27 | 1.85  | 2.6  | -0.49 | 0.0010796979  | 0.0447245146 |
| chr17                   | 7279387  | 7279436  | -0.94 | 1.66  | 0.24  | -0.37 | -0.29 | 2.34 | 2.38 | 2.11  | 3.14 | -0.42 | 0.0033388253  | 0.0623554214 |
| chr17                   | 7279477  | 7279526  | -0.79 | 1.31  | 0.32  | -0.61 | -0.38 | 1.78 | 1.81 | 1.59  | 2.48 | -0.27 | 0.0149201702  | 0.1096121297 |
| Nearby Gene: SEC14L1    |          |          |       |       |       |       |       |      |      |       |      |       |               |              |
| chr17                   | 72718037 | 72718086 | 2.12  | 1.52  | 2.22  | -1.02 | 2.7   | 2.93 | 2.61 | 2.31  | 2.97 | 2.81  | 0.0024812280  | 0.0568431063 |
| chr17                   | 72718132 | 72718181 | 2.24  | 1.71  | 2.41  | -0.39 | 3.18  | 3.47 | 2.78 | 2.43  | 3.6  | 3.29  | 0.00056833492 | 0.0383436457 |
| chr17                   | 72718257 | 72718306 | 2.3   | 1.68  | 2.34  | -0.18 | 3.23  | 3.19 | 2.77 | 2.17  | 3.47 | 3.03  | 0.0015022165  | 0.0489960182 |
| Nearby Gene: FAM64A     |          |          |       |       |       |       |       |      |      |       |      |       |               |              |
| chr17                   | 6288690  | 6288739  | 1.84  | 0.55  | 0.67  | 0.35  | 3.72  | 4.11 | 3.63 | 0.52  | 3.67 | 3.15  | 0.0144331890  | 0.1081485715 |
| chr17                   | 6288785  | 6288834  | 1.7   | 0.72  | 0.85  | 0.77  | 2.73  | 2.95 | 2.75 | 0.78  | 3.68 | 2.38  | 0.0020123547  | 0.0534615452 |
| chr17                   | 6288890  | 6288939  | 1.45  | 0.63  | 0.58  | 0.44  | 2.05  | 2.44 | 2.22 | 0.81  | 3.09 | 1.87  | 0.0009223928  | 0.042977236  |
| Nearby Gene: unknown    |          |          |       |       |       |       |       |      |      |       |      |       |               |              |
| chr17                   | 44078086 | 44078143 | 0.28  | 1.69  | 0.57  | -0.63 | 2.29  | 1.74 | 1.86 | 1.92  | 2.38 | 1.99  | 0.0072102607  | 0.0819215596 |
| chr17                   | 44078251 | 44078300 | 0.27  | 1.9   | 0.62  | -0.99 | 2.73  | 2.05 | 2.12 | 2.21  | 2.56 | 2.64  | 0.0036491264  | 0.0642552466 |
| chr17                   | 44078381 | 44078430 | 0.48  | 1.28  | 0.72  | -0.04 | 2.45  | 1.93 | 1.72 | 1.63  | 2.44 | 2.42  | 0.0131705012  | 0.1041345887 |
| Nearby Gene: HOXB3      |          |          |       |       |       |       |       |      |      |       |      |       |               |              |
| chr17                   | 44004023 | 44004072 | 2.33  | -1.01 | -1.16 | -1.6  | -0.98 | 2.34 | 1.83 | -0.87 | 3.02 | 1.68  | 0.0003261712  | 0.0333344587 |
| chr17                   | 44004143 | 44004192 | 2.47  | -0.05 | -0.43 | -0.76 | -0.52 | 2.17 | 1.98 | -0.48 | 2.77 | 1.68  | 0.009341208   | 0.0909341208 |
| chr17                   | 44004243 | 44004298 | 2.01  | -0.29 | -0.2  | -0.72 | -0.34 | 1.79 | 1.22 | -0.2  | 2.4  | 1.39  | 0.0190575883  | 0.1216913639 |
| Nearby Gene: C1QL1      |          |          |       |       |       |       |       |      |      |       |      |       |               |              |
| chr17                   | 40401684 | 40401733 | -0.63 | -0.12 | 0.46  | 0.38  | 0.8   | 1.33 | 1.85 | 1.33  | 2.55 | 0.68  | 0.0233839815  | 0.1333290150 |
| chr17                   | 40401779 | 40401828 | -0.88 | -0.33 | 0.6   | 0.29  | 0.13  | 1.29 | 1.79 | 1.17  | 2.79 | 0.4   | 0.0010060479  | 0.0438567402 |
| chr17                   | 40401894 | 40401943 | 0.44  | 0.06  | 0.69  | 0.45  | 0.59  | 1.54 | 1.57 | 1.08  | 2.25 | 1.07  | 0.0043275354  | 0.0679819294 |
| Nearby Gene: WNK4       |          |          |       |       |       |       |       |      |      |       |      |       |               |              |
| chr17                   | 38189579 | 38189628 | 1.05  | 1.34  | 0.27  | 0.41  | 0.59  | 1.84 | 2.91 | 0.85  | 2.97 | 1.89  | 0.0008979063  | 0.0428292979 |
| chr17                   | 38189669 | 38189718 | 0.8   | 1.48  | 0.21  | 0.29  | 0.43  | 1.6  | 2.64 | 1.17  | 2.49 | 1.7   | 0.0079226961  | 0.0847773432 |
| chr17                   | 38189774 | 38189823 | 0.78  | 1.49  | 0.26  | -0.04 | 0.33  | 1.45 | 2.26 | 1.09  | 2.64 | 1.47  | 0.0041326450  | 0.0669405364 |
| Nearby Gene: KRT19      |          |          |       |       |       |       |       |      |      |       |      |       |               |              |
| chr17                   | 36936966 | 36937015 | 1.28  | 0.87  | 0.95  | 1.85  | 1.88  | 2.62 | 2.36 | 2     | 3.36 | 1.84  | 0.0013936973  | 0.0479310057 |
| chr17                   | 36937096 | 36937145 | 1.4   | 0.78  | 0.77  | 1.7   | 2.37  | 2.87 | 2.62 | 1.65  | 3.85 | 2.07  | 0.0029486294  | 0.0598713157 |
| chr17                   | 36937186 | 36937235 | 1.19  | 0.64  | 0.74  | 1.33  | 2.32  | 2.73 | 2.49 | 1.48  | 3.58 | 2.36  | 0.0264327831  | 0.1407859447 |
| Nearby Gene: SLC6A4     |          |          |       |       |       |       |       |      |      |       |      |       |               |              |
| chr17                   | 25589239 | 25589288 | -0.51 | 0.14  | 0.4   | 0.38  | 1.57  | 1.49 | 2.34 | 2.06  | 3.15 | 2.15  | 0.0462673643  | 0.1827160223 |
| chr17                   | 25589339 | 25589388 | 0.12  | 0.23  | 0.78  | 0.38  | 2.75  | 2    | 2.88 | 1.79  | 3.86 | 1.9   | 0.0039284657  | 0.0658651551 |
| chr17                   | 25589454 | 25589503 | -1.72 | -0.65 | -0.74 | -0.33 | 0.79  | 1.3  | 2.02 | 1.22  | 2    | 0.75  | 0.0204978958  | 0.1256821470 |
| Nearby Gene: PYY2       |          |          |       |       |       |       |       |      |      |       |      |       |               |              |
| chr17                   | 23579181 | 23579237 | 0.76  | -0.19 | 0.11  | 1.07  | 1.65  | 2.8  | 3.06 | 1.22  | 2.63 | 1.14  | 0.0017361186  | 0.0511632530 |
| chr17                   | 23579296 | 23579345 | 0.42  | -0.01 | 0.3   | 1.29  | 1.95  | 3.22 | 2.97 | 1.7   | 3.06 | 1.35  | 0.0012381665  | 0.0464531368 |
| chr17                   | 23579366 | 23579415 | 0.32  | 0.07  | 0.22  | 1.21  | 1.52  | 3.16 | 2.84 | 1.7   | 2.64 | 0.93  | 0.0005936707  | 0.0384487121 |
| Nearby Gene: HS3ST3B1   |          |          |       |       |       |       |       |      |      |       |      |       |               |              |
| chr17                   | 14147477 | 14147526 | 0.54  | 0.47  | -1.15 | -0.38 | 0.58  | 1.47 | 1.51 | 1.5   | 1.67 | -0.32 | 0.0128897408  | 0.1032482408 |
| chr17                   | 14147587 | 14147636 | 0.6   | 0.44  | -0.97 | -0.32 | 0.71  | 1.91 | 1.43 | 1.64  | 2.24 | 0.29  | 0.0149104487  | 0.1095888855 |
| chr17                   | 14147707 | 14147756 | 0.93  | 0.66  | -1.2  | -0.1  | 1.17  | 2.07 | 1.95 | 1.8   | 2.09 | 0.17  | 0.006448948   | 0.0785051822 |
| Nearby Gene: CARHSP1    |          |          |       |       |       |       |       |      |      |       |      |       |               |              |
| chr16                   | 8869029  | 8869078  | 0.25  | 0.79  | -0.25 | 0.24  | 1.91  | 2.12 | 1.79 | 1.81  | 2.73 | 0.51  | 0.0023295488  | 0.0556933071 |
| chr16                   | 8869124  | 8869173  | 0.23  | 0.59  | 0.01  | 0.22  | 1.27  | 2.02 | 1.44 | 1.84  | 2.47 | 0.78  | 0.0015575423  | 0.0494185162 |
| chr16                   | 8869219  | 8869268  | 0.57  | 1.1   | -0.23 | 0.41  | 1.81  | 2.51 | 2.24 | 2.23  | 2.82 | 0.67  | 0.0105030552  | 0.0951880612 |
| Nearby Gene: CARHSP1    |          |          |       |       |       |       |       |      |      |       |      |       |               |              |
| chr16                   | 8868597  | 8868646  | 0.73  | 1     | -0.3  | 0.4   | 2.47  | 3.11 | 2.52 | 1.89  | 3.19 | 0.66  | 0.0388285002  | 0.1680259043 |
| chr16                   | 8868712  | 8868761  | 0.43  | 0.7   | -0.48 | 0.48  | 1.69  | 2.28 | 1.95 | 2     | 2.78 | 0.46  | 0.0126734522  | 0.1025859283 |
| chr16                   | 8868797  | 8868846  | 0.94  | 1.57  | -0.61 | 0.92  | 2.87  | 3.06 | 3.05 | 2.73  | 3.77 | 1.11  | 0.0023579382  | 0.0559184939 |

|                      |           |           |       |       |       |       |       |      |      |       |      |       |              |              |
|----------------------|-----------|-----------|-------|-------|-------|-------|-------|------|------|-------|------|-------|--------------|--------------|
| Nearby Gene: BCAR1   |           |           |       |       |       |       |       |      |      |       |      |       |              |              |
| chr16                | 73843421  | 73843470  | -0.06 | 0.95  | 0.88  | 0.64  | 0.45  | 1.23 | 1.69 | 1.38  | 2.67 | 1.42  | 0.0189416109 | 0.1213725891 |
| chr16                | 73843501  | 73843550  | 0.06  | 0.83  | 0.68  | 0.74  | 0.48  | 1.3  | 1.5  | 1.37  | 2.64 | 1.19  | 0.0015639934 | 0.0495098213 |
| chr16                | 73843591  | 73843640  | -0.07 | 0.95  | 0.74  | 0.84  | 0.53  | 1.24 | 1.54 | 1.47  | 2.53 | 1.22  | 0.0144157607 | 0.1080999856 |
| Nearby Gene: SMPD3   |           |           |       |       |       |       |       |      |      |       |      |       |              |              |
| chr16                | 66956690  | 66956739  | 1.74  | 1.59  | -0.88 | 1.72  | 2.28  | 4.13 | 3.21 | 0.85  | 2.92 | 1.47  | 0.0203356619 | 0.1252461043 |
| chr16                | 66956800  | 66956849  | 1.86  | 1.71  | -0.51 | 1.89  | 3.05  | 4.35 | 3.32 | 0.73  | 4.04 | 1.82  | 0.0009164503 | 0.0429142990 |
| chr16                | 66956875  | 66956924  | 1.84  | 1.65  | -0.66 | 1.8   | 2.65  | 4.27 | 3.37 | 0.72  | 3.49 | 1.4   | 0.0005037631 | 0.0365696839 |
| Nearby Gene: HSF4    |           |           |       |       |       |       |       |      |      |       |      |       |              |              |
| chr16                | 65757596  | 65757645  | -0.25 | 0.08  | -0.45 | 0.1   | 0.33  | 2.16 | 2.33 | 2.24  | 3.21 | -0.11 | 0.0287781244 | 0.1464130686 |
| chr16                | 65757716  | 65757765  | -0.22 | 0.11  | -0.46 | 0.1   | 0.42  | 1.74 | 1.92 | 2     | 2.53 | 0.02  | 0.0024382127 | 0.0565307013 |
| chr16                | 65757801  | 65757850  | 0.41  | 0.43  | -0.11 | 0.15  | 0.27  | 1.8  | 1.62 | 1.99  | 3.22 | 0.12  | 0.0121038745 | 0.1006599689 |
| Nearby Gene: GPR96   |           |           |       |       |       |       |       |      |      |       |      |       |              |              |
| chr16                | 562221957 | 562222006 | -0.58 | 0.62  | -0.97 | 0.69  | -0.54 | 0.22 | 1.9  | 1.03  | 1.97 | 1.54  | 0.0011065151 | 0.0449407203 |
| chr16                | 56222077  | 56222126  | -1.39 | 0.63  | -1.38 | 0.84  | -0.7  | 0.25 | 1.98 | 1.01  | 1.66 | 1.27  | 0.0047974962 | 0.0704733742 |
| chr16                | 56222152  | 56222201  | -1.49 | 0.89  | -1.62 | 0.99  | -0.69 | 0.14 | 2.32 | 1.41  | 1.93 | 1.71  | 0.0076203236 | 0.0836348547 |
| Nearby Gene: TRIM72  |           |           |       |       |       |       |       |      |      |       |      |       |              |              |
| chr16                | 31132829  | 31132878  | 0.77  | 1.08  | 0.05  | -0.73 | 0.47  | 2.44 | 1.52 | 1.81  | 2.26 | 0.4   | 0.0007919946 | 0.0413519441 |
| chr16                | 31132914  | 31132963  | 0.59  | 0.84  | 0.22  | -0.48 | 0.49  | 2.29 | 1.53 | 1.92  | 2.11 | 0.38  | 0.0173056394 | 0.1167763752 |
| chr16                | 31133044  | 31133093  | 1.07  | 0.97  | 0.55  | -0.51 | 0.63  | 2.21 | 1.64 | 1.57  | 2.33 | 0.88  | 0.0159858300 | 0.1128945266 |
| Nearby Gene: RASGRF1 |           |           |       |       |       |       |       |      |      |       |      |       |              |              |
| chr15                | 77082859  | 77082908  | 2.44  | 1.47  | 1.02  | 2.09  | 2.1   | 3.15 | 2.89 | 1.63  | 3.52 | 3.3   | 0.0190828392 | 0.1217575322 |
| chr15                | 77082989  | 77083038  | 2.87  | 1.52  | 1.29  | 2.27  | 2.94  | 3.92 | 3.49 | 1.44  | 3.79 | 3.99  | 0.0196381630 | 0.1232967565 |
| chr15                | 77083189  | 77083238  | 3     | 1.07  | 1.37  | 1.8   | 2.81  | 4.04 | 3.77 | 0.85  | 3.65 | 4     | 0.0217593380 | 0.1290024421 |
| Nearby Gene: ASB2    |           |           |       |       |       |       |       |      |      |       |      |       |              |              |
| chr14                | 93490386  | 93490435  | 1.67  | 1.22  | 0.54  | 0.71  | 2.43  | 3.17 | 2.68 | 1.16  | 2.78 | 2.85  | 0.0013428615 | 0.0474947536 |
| chr14                | 93490581  | 93490630  | 1.17  | 0.84  | 0.02  | 0.27  | 1.43  | 2.3  | 1.92 | 0.96  | 2.18 | 2.42  | 0.0009160570 | 0.0429142990 |
| chr14                | 93490661  | 93490710  | 1.54  | 1.22  | 0.02  | 0.33  | 1.42  | 2.55 | 2.37 | 0.93  | 2.03 | 2.45  | 0.0170278208 | 0.1160084835 |
| Nearby Gene: C14orf4 |           |           |       |       |       |       |       |      |      |       |      |       |              |              |
| chr14                | 76568588  | 76568637  | 0.01  | 2.16  | -0.38 | -0.42 | 1.47  | 2.15 | 1.73 | 2.39  | 1.97 | -0.03 | 0.0016146548 | 0.0499441255 |
| chr14                | 76568707  | 76568756  | 0.14  | 1.86  | -0.18 | -0.35 | 1.61  | 2.05 | 1.61 | 2.08  | 2.5  | 0.13  | 0.007447835  | 0.0408987033 |
| chr14                | 76568731  | 76568780  | 0.17  | 2.23  | -0.21 | -0.38 | 1.77  | 2.46 | 1.8  | 2.52  | 2.96 | 0.38  | 0.0099622110 | 0.0930057991 |
| Nearby Gene: FOXA1   |           |           |       |       |       |       |       |      |      |       |      |       |              |              |
| chr14                | 37131803  | 37131852  | 0.85  | 0.47  | 1.72  | 1.51  | 2.41  | 2.69 | 2.4  | 1.63  | 3.73 | 2.55  | 0.0020266355 | 0.0535065496 |
| chr14                | 37131878  | 37131934  | 1.22  | 0.65  | 2.07  | 2.45  | 3.25  | 4.32 | 4.12 | 2.04  | 4.6  | 3.54  | 0.0093428244 | 0.0908192080 |
| chr14                | 37131983  | 37132032  | 1.27  | 0.77  | 2.04  | 2.04  | 2.62  | 3.55 | 3.64 | 1.95  | 4.39 | 3.03  | 0.0245762155 | 0.1362617986 |
| Nearby Gene: LAG3    |           |           |       |       |       |       |       |      |      |       |      |       |              |              |
| chr12                | 6752404   | 6752453   | -0.32 | 0.76  | -0.85 | -0.28 | 0.83  | 1.66 | 1.71 | 2.07  | 3.21 | 1.98  | 0.0329141565 | 0.1555992926 |
| chr12                | 6752604   | 6752653   | -0.09 | 0.38  | -0.36 | 0.14  | 0.55  | 1.89 | 1.36 | 1.38  | 1.56 | 1.42  | 0.0077136204 | 0.0840022255 |
| chr12                | 6752724   | 6752773   | 0.15  | 0.8   | -0.17 | 0.19  | 0.72  | 2    | 1.33 | 1.66  | 2.4  | 1.63  | 0.0101452359 | 0.0937019966 |
| Nearby Gene: KRT80   |           |           |       |       |       |       |       |      |      |       |      |       |              |              |
| chr12                | 50871102  | 50871151  | -0.24 | 1.26  | 0.58  | 1.62  | -0.06 | 1.9  | 1.81 | 1.57  | 2.66 | 1.86  | 0.0004059248 | 0.0346443169 |
| chr12                | 50871207  | 50871256  | 0.16  | 1.53  | 0.77  | 1.77  | 0.86  | 2.09 | 2.12 | 1.76  | 2.8  | 2.04  | 0.0012151430 | 0.0462151098 |
| chr12                | 50871307  | 50871356  | -0.12 | 1.29  | 0.47  | 1.51  | 0.09  | 1.68 | 1.82 | 1.54  | 2.36 | 1.78  | 0.0010188388 | 0.0440145013 |
| Nearby Gene: ACVRL1  |           |           |       |       |       |       |       |      |      |       |      |       |              |              |
| chr12                | 50586352  | 50586401  | 0.18  | 0.27  | 0.3   | 0.29  | 0.66  | 1.32 | 2.28 | 2.1   | 3.02 | 0.47  | 0.0068524406 | 0.0803568557 |
| chr12                | 50586447  | 50586496  | 0.19  | 0.23  | 0.24  | 0.06  | 0.83  | 1.34 | 2.17 | 2     | 2.63 | 0.13  | 0.0355669153 | 0.1611703576 |
| chr12                | 50586532  | 50586581  | 0.43  | 0.1   | 0.27  | 0.27  | 0.65  | 1.39 | 1.82 | 2.04  | 2.44 | 0.17  | 0.0352061575 | 0.1604880151 |
| Nearby Gene: C1QL4   |           |           |       |       |       |       |       |      |      |       |      |       |              |              |
| chr12                | 48014936  | 48014985  | 0.63  | 1.06  | 1.17  | 1.18  | 2.03  | 2.42 | 2.07 | 1.77  | 3.29 | 3.03  | 0.0001920414 | 0.0303749074 |
| chr12                | 48015036  | 48015085  | 0.23  | 0.75  | 1     | 0.57  | 2.52  | 2.04 | 1.98 | 1.56  | 3.36 | 1.51  | 0.0000614479 | 0.0244289612 |
| chr12                | 48015151  | 48015200  | -0.36 | 0.38  | 0.76  | 0.44  | 1.46  | 1.62 | 1.44 | 1.53  | 2.23 | 0.98  | 0.0001585798 | 0.0292340585 |
| Nearby Gene: PRPH    |           |           |       |       |       |       |       |      |      |       |      |       |              |              |
| chr12                | 47974082  | 47974131  | 0.47  | 1.1   | 0.19  | 0.24  | -0.26 | 1.37 | 1.23 | 1.39  | 1.88 | 1.67  | 0.0123435576 | 0.1014880781 |
| chr12                | 47974207  | 47974256  | 0.19  | 0.66  | -0.1  | -0.14 | -0.61 | 1.07 | 0.95 | 1.12  | 1.89 | 1.42  | 0.0115984589 | 0.0989742842 |
| chr12                | 47974307  | 47974356  | 0.11  | 0.7   | -0.26 | -0.05 | -0.4  | 1.22 | 0.97 | 1.1   | 1.78 | 1.38  | 0.0289338681 | 0.1467660083 |
| Nearby Gene: POLE    |           |           |       |       |       |       |       |      |      |       |      |       |              |              |
| chr12                | 131728756 | 131728805 | 2.29  | 1.73  | 2.3   | 1.86  | 3.12  | 3.73 | 3.19 | 2.46  | 3.76 | 3.42  | 0.0240214811 | 0.1348748472 |
| chr12                | 131728972 | 131729021 | 2.54  | 1.73  | 2.13  | 1.94  | 3.39  | 4.01 | 3.33 | 2.32  | 3.61 | 3.77  | 0.0020762366 | 0.0539008016 |
| chr12                | 131729166 | 131729215 | 2.48  | 1.69  | 2.33  | 1.71  | 3.48  | 4.16 | 2.95 | 2.06  | 4.1  | 3.59  | 0.0016266774 | 0.0501383555 |
| Nearby Gene: unknown |           |           |       |       |       |       |       |      |      |       |      |       |              |              |
| chr12                | 113363056 | 113363105 | 0.38  | -1.06 | -0.29 | 1.01  | 0.58  | 1.29 | 2.56 | -0.44 | 2.67 | 1.36  | 0.0002984927 | 0.0329549981 |
| chr12                | 113363156 | 113363205 | 0.33  | -1.84 | -0.14 | 0.8   | 0.5   | 1.62 | 3.06 | -0.65 | 3.25 | 1.6   | 0.0002473300 | 0.0317897892 |
| chr12                | 113363341 | 113363390 | 0.22  | -1.58 | -0.13 | 1.33  | 0.57  | 1.26 | 2.69 | -0.43 | 3.11 | 1.04  | 0.0022405120 | 0.0552343881 |
| Nearby Gene: EFCAB4A |           |           |       |       |       |       |       |      |      |       |      |       |              |              |
| chr11                | 817937    | 817986    | 0.82  | 0.22  | -0.15 | 0.16  | 1.55  | 2.58 | 2.58 | -0.75 | 2.82 | 1.36  | 0.0200889641 | 0.1245424565 |
| chr11                | 818127    | 818176    | 0.49  | 0.36  | -0.01 | 0.33  | 1.54  | 1.95 | 2.56 | -0.16 | 3.38 | 1.4   | 0.0024980597 | 0.0569060378 |
| chr11                | 818242    | 818291    | 0.4   | 0.44  | -0.19 | 0.34  | 1.2   | 1.91 | 2.76 | -0.37 | 3.33 | 1.09  | 0.0083235670 | 0.0865451557 |
| Nearby Gene: PHOX2A  |           |           |       |       |       |       |       |      |      |       |      |       |              |              |

|                           |           |           |       |       |       |       |       |       |      |       |      |      |              |              |
|---------------------------|-----------|-----------|-------|-------|-------|-------|-------|-------|------|-------|------|------|--------------|--------------|
| chr11                     | 71633653  | 71633702  | 0.57  | 0.14  | 0.61  | 0.37  | 1.22  | 1.46  | 2.24 | 0.66  | 2.62 | 1.12 | 0.0226771833 | 0.1314922098 |
| chr11                     | 71633778  | 71633827  | 0.56  | -0.49 | 0.27  | 0.89  | 1.31  | 1.7   | 2.63 | -0.33 | 3.46 | 2.02 | 0.0217108430 | 0.1288771222 |
| chr11                     | 71633953  | 71634002  | 0.83  | -0.3  | 0.02  | -0.02 | 1     | 1.8   | 1.92 | 0.09  | 2.41 | 1.43 | 0.0070776516 | 0.0812891022 |
| Nearby Gene: NRXN2        |           |           |       |       |       |       |       |       |      |       |      |      |              |              |
| chr11                     | 64241704  | 64241753  | 0.96  | 0.72  | 0.47  | 1.56  | 1.47  | 2.12  | 2.37 | 1.05  | 2.82 | 2.29 | 0.0009861325 | 0.0436215808 |
| chr11                     | 64241809  | 64241858  | 0.74  | 0.63  | 0.5   | 1.46  | 1.25  | 2.08  | 2.16 | 1.02  | 2.52 | 2.36 | 0.0009511072 | 0.0431511989 |
| chr11                     | 64241989  | 64242038  | 0.7   | 0.88  | 0.47  | 1.64  | 1.27  | 2.18  | 1.96 | 1.08  | 2.69 | 2.2  | 0.0011660927 | 0.0456368265 |
| Nearby Gene: TSPAN32      |           |           |       |       |       |       |       |       |      |       |      |      |              |              |
| chr11                     | 2282124   | 2282173   | -1.89 | 0.68  | -0.74 | 0.57  | 1.52  | 2.56  | 1.25 | 1.11  | 3.14 | 1.42 | 0.0047487892 | 0.0701592796 |
| chr11                     | 2282194   | 2282243   | -1.69 | 0.45  | -0.81 | 0.52  | 1.53  | 2.49  | 1.27 | 1.05  | 3.2  | 1.33 | 0.0086478760 | 0.0880769511 |
| chr11                     | 2282309   | 2282358   | -0.67 | 0.48  | -0.11 | 0.48  | 1.25  | 2.12  | 1.04 | 1.34  | 2.65 | 1.24 | 0.0287873861 | 0.1464366692 |
| Nearby Gene: H19          |           |           |       |       |       |       |       |       |      |       |      |      |              |              |
| chr11                     | 1977616   | 1977665   | 3.39  | 0.41  | 1.75  | 1.94  | 4.26  | 4.28  | 3.86 | 0.66  | 4.34 | 4.14 | 0.0028838980 | 0.0594963170 |
| Nearby Gene: SPON1        |           |           |       |       |       |       |       |       |      |       |      |      |              |              |
| chr11                     | 13942147  | 13942196  | 0.06  | -0.05 | 0.54  | 1.1   | 1.08  | 2.35  | 2.48 | 1.62  | 3.12 | 3.42 | 0.0261531802 | 0.1401021606 |
| chr11                     | 13942242  | 13942291  | 0.96  | 0.58  | 0.49  | 1.56  | 1.29  | 2.67  | 2.83 | 1.7   | 3.31 | 3.62 | 0.0149461225 | 0.1097051926 |
| chr11                     | 13942317  | 13942366  | -0.68 | -0.28 | -0.18 | 0.33  | 0.51  | 1.58  | 1.78 | 1.28  | 2.36 | 2.35 | 0.0033889790 | 0.0626919052 |
| Nearby Gene: IGSF9B       |           |           |       |       |       |       |       |       |      |       |      |      |              |              |
| chr11                     | 133306794 | 133306843 | 2.31  | 1.08  | 1.69  | 1.33  | 3.44  | 4.09  | 3.04 | 1.23  | 3.85 | 3.75 | 0.0038285388 | 0.0652855818 |
| chr11                     | 133306880 | 133306929 | 2.11  | 1     | 1.34  | 0.86  | 2.85  | 3.39  | 3.01 | 0.96  | 3.16 | 3.32 | 0.0019740802 | 0.0531912663 |
| chr11                     | 133306974 | 133307023 | 2.27  | 1.34  | 1.71  | 1.38  | 3.29  | 3.67  | 3.03 | 1.43  | 3.79 | 3.48 | 0.0199562203 | 0.1241631706 |
| Nearby Gene: TP53AIP1     |           |           |       |       |       |       |       |       |      |       |      |      |              |              |
| chr11                     | 128315801 | 128315850 | 1.31  | 0.93  | 0.6   | -0.67 | 1.81  | 2.41  | 1.74 | 0.92  | 2.33 | 2.32 | 0.0080591031 | 0.0852989680 |
| chr11                     | 128315911 | 128315960 | 1.32  | 0.85  | 0.44  | -0.11 | 2.19  | 2.82  | 2.16 | 0.94  | 2.12 | 2.56 | 0.0017845146 | 0.0514959912 |
| chr11                     | 128316001 | 128316050 | 1.5   | 0.9   | -0.51 | 0.44  | 1.83  | 2.95  | 2.35 | 0.67  | 1.94 | 2.52 | 0.0004841118 | 0.0361927873 |
| Nearby Gene: KCNMA1       |           |           |       |       |       |       |       |       |      |       |      |      |              |              |
| chr10                     | 79066324  | 79066373  | -0.38 | -0.91 | -0.73 | 0.88  | 0.33  | 1.9   | 2.68 | 1.55  | 2.36 | 0.75 | 0.0009475184 | 0.0431230530 |
| chr10                     | 79066429  | 79066478  | -0.03 | -0.5  | -0.55 | 0.9   | 0.28  | 1.57  | 2.16 | 1.39  | 2.03 | 0.74 | 0.0085110403 | 0.0873643261 |
| chr10                     | 79066499  | 79066550  | -0.32 | -1.04 | -0.86 | 0.67  | 0.2   | 1.68  | 2.59 | 1.45  | 1.73 | 0.22 | 0.0479023150 | 0.1857265632 |
| Nearby Gene: PPYR1        |           |           |       |       |       |       |       |       |      |       |      |      |              |              |
| chr10                     | 46502543  | 46502593  | 0.23  | 0.12  | 0.34  | 1.04  | 0.31  | 1.02  | 1.46 | 1.71  | 2.29 | 1.15 | 0.0109079906 | 0.0965937595 |
| chr10                     | 46502653  | 46502702  | 0.04  | 0.04  | 0.22  | 1.05  | 0.45  | 1.11  | 1.44 | 1.84  | 2.28 | 1.29 | 0.0094215844 | 0.0910852626 |
| chr10                     | 46502773  | 46502822  | 0.49  | 0.11  | 0.14  | 0.86  | 0.52  | 1.11  | 1.32 | 1.54  | 2.03 | 1.17 | 0.0003646392 | 0.0337940199 |
| Nearby Gene: RASGEF1A     |           |           |       |       |       |       |       |       |      |       |      |      |              |              |
| chr10                     | 43046926  | 43046975  | 0.32  | 0.25  | 0.36  | 0.71  | 0.86  | 1.49  | 1.85 | 0.65  | 2.25 | 1.72 | 0.0028215525 | 0.0590728005 |
| chr10                     | 43047011  | 43047060  | 0.6   | 0.16  | 0.55  | 0.62  | 1.2   | 2.16  | 2.43 | 0.64  | 3.31 | 2.12 | 0.0122732012 | 0.1012730986 |
| chr10                     | 43047116  | 43047165  | 0.24  | -0.13 | 0.21  | 0.07  | 0.19  | 1.53  | 1    | 0.22  | 1.73 | 1.1  | 0.0199620191 | 0.1241724224 |
| Nearby Gene: FAMS3B       |           |           |       |       |       |       |       |       |      |       |      |      |              |              |
| chr10                     | 126309880 | 126309929 | 2.43  | 1.51  | 1.95  | 2.08  | 3.18  | 3.99  | 3.2  | 1.92  | 3.59 | 3.59 | 0.0319063625 | 0.1533625563 |
| chr10                     | 126309986 | 126310035 | 2.6   | 1.46  | 1.91  | 2.21  | 3.98  | 4.59  | 2.35 | 2.03  | 4.55 | 4.62 | 0.0333080097 | 0.1564727345 |
| chr10                     | 126310062 | 126310111 | 2.64  | 1.33  | 1.83  | 1.86  | 3.29  | 4.72  | 3.72 | 1.57  | 3.34 | 3.92 | 0.0003933046 | 0.0344040191 |
| Nearby Gene: PPAPDC1A     |           |           |       |       |       |       |       |       |      |       |      |      |              |              |
| chr10                     | 122207490 | 122207539 | 0.38  | 1.28  | 0.09  | 1.42  | 1.08  | 2.91  | 2.32 | 1.77  | 3.15 | 0.95 | 0.0058691212 | 0.0757775093 |
| chr10                     | 122207585 | 122207634 | 0.46  | 1.34  | 0.17  | 1.36  | 1.09  | 2.75  | 2.21 | 1.91  | 3.59 | 1.09 | 0.0028639710 | 0.0593291180 |
| chr10                     | 122207660 | 122207709 | 0.32  | 1.55  | -0.1  | 1.45  | 0.66  | 2.81  | 2.32 | 1.95  | 3.57 | 0.68 | 0.0379516855 | 0.1661400336 |
| Nearby Gene: LOC100132839 |           |           |       |       |       |       |       |       |      |       |      |      |              |              |
| chr10                     | 115792628 | 115792687 | 1.48  | -0.53 | -0.95 | 1.83  | -0.53 | 1.6   | 1.35 | -0.97 | 2.78 | 2.03 | 0.0336738651 | 0.1572232304 |
| chr10                     | 115792698 | 115792747 | 1.3   | -0.68 | -1.3  | 1.82  | -0.92 | 1.45  | 1.48 | -0.94 | 2.71 | 2.19 | 0.0171503636 | 0.1163711014 |
| chr10                     | 115792818 | 115792867 | 0.54  | -0.48 | -0.71 | 1.29  | -0.63 | 1.09  | 1.18 | -0.67 | 2.21 | 1.55 | 0.0115786363 | 0.0988906083 |
| Nearby Gene: TAL1         |           |           |       |       |       |       |       |       |      |       |      |      |              |              |
| chr1                      | 47467048  | 47467097  | 0.95  | 0.98  | 0.85  | 0.15  | 1.73  | 1.14  | 2.42 | 1.96  | 2.83 | 1.72 | 0.0018096876 | 0.0517605966 |
| chr1                      | 47467159  | 47467208  | -0.7  | 0.93  | 0.4   | -0.1  | 1.45  | -0.78 | 2.34 | 2.25  | 3.34 | 1.31 | 0.0011192217 | 0.0450979647 |
| chr1                      | 47467254  | 47467303  | -0.45 | 0.92  | 0.55  | -0.12 | 1.65  | -0.38 | 2.4  | 2.08  | 3.64 | 1.24 | 0.0003666117 | 0.0338757494 |
| Nearby Gene: POU3F1       |           |           |       |       |       |       |       |       |      |       |      |      |              |              |
| chr1                      | 38286214  | 38286263  | 1.09  | 0.05  | 0.7   | 0.75  | 1.32  | 2.61  | 2.3  | 1.22  | 2.85 | 1.4  | 0.0107158082 | 0.0958998033 |
| chr1                      | 38286294  | 38286343  | 1.19  | 0.23  | 0.93  | 0.89  | 1.27  | 2.45  | 2.37 | 1.48  | 2.51 | 1.37 | 0.0001408040 | 0.0287990422 |
| chr1                      | 38286409  | 38286458  | 1.1   | 0.46  | 0.91  | 0.96  | 0.96  | 2.22  | 2.26 | 1.64  | 2.09 | 1.2  | 0.0004015897 | 0.0345766746 |
| Nearby Gene: EPHA10       |           |           |       |       |       |       |       |       |      |       |      |      |              |              |
| chr1                      | 38002568  | 38002617  | 1.58  | 0.54  | 1.73  | 2.15  | 1.72  | 3.02  | 3.33 | 1.35  | 3.39 | 2.75 | 0.0219268406 | 0.1294156564 |
| chr1                      | 38002673  | 38002722  | 1.64  | 0.68  | 1.81  | 1.91  | 2.41  | 3.25  | 3.45 | 1.4   | 4.15 | 3.1  | 0.0079304797 | 0.0848024173 |
| chr1                      | 38002773  | 38002822  | 1.89  | 0.53  | 2.09  | 2.3   | 2.85  | 4.01  | 3.77 | 1.38  | 4.52 | 3.46 | 0.0124453661 | 0.1018549345 |
| Nearby Gene: TMEM200B     |           |           |       |       |       |       |       |       |      |       |      |      |              |              |
| chr1                      | 29319407  | 29319456  | 1.18  | 1.03  | 0.19  | 0.84  | -0.13 | 1.28  | 1.79 | 1.62  | 2.33 | 1.21 | 0.0041907560 | 0.0672747667 |
| chr1                      | 29319512  | 29319561  | 1.22  | 1.28  | 0.38  | 1.02  | 0.14  | 1.74  | 2.25 | 2.12  | 3.04 | 1.7  | 0.0022447090 | 0.0552521466 |
| chr1                      | 29319612  | 29319661  | 1.01  | 0.96  | 0.3   | 0.71  | -0.19 | 1.25  | 1.73 | 1.66  | 2.17 | 1.27 | 0.0003358679 | 0.0334846984 |
| Nearby Gene: NID1         |           |           |       |       |       |       |       |       |      |       |      |      |              |              |
| chr1                      | 234295539 | 234295588 | -0.15 | 0.67  | 1.24  | -0.37 | 0.29  | 2.17  | 2.67 | 1.86  | 1.64 | 0.04 | 0.0245542929 | 0.1362020384 |
| chr1                      | 234295649 | 234295698 | -0.04 | 0.56  | 1.09  | -0.66 | 0.51  | 2     | 2.46 | 2.1   | 1.82 | 0.38 | 0.0095934602 | 0.0917252233 |
| chr1                      | 234295714 | 234295763 | 0.07  | 0.68  | 1.4   | -0.85 | 0.6   | 1.86  | 2.55 | 2.1   | 2.42 | 0.33 | 0.0111801946 | 0.0976011821 |

|                              |           |           |       |       |       |       |      |      |      |       |      |      |              |              |
|------------------------------|-----------|-----------|-------|-------|-------|-------|------|------|------|-------|------|------|--------------|--------------|
| Nearby Gene: ENSG00000216862 |           |           |       |       |       |       |      |      |      |       |      |      |              |              |
| chr1                         | 226706706 | 226706755 | 0.99  | 0.69  | 0.36  | 0.52  | 3    | 3.32 | 2.4  | 0.27  | 3.39 | 2.51 | 0.0014966832 | 0.0489592741 |
| chr1                         | 226706776 | 226706825 | 1.04  | 0.54  | 0.4   | 0.45  | 3.06 | 3.17 | 2.38 | 0.38  | 3.29 | 2.5  | 0.0001404431 | 0.0287990422 |
| chr1                         | 226706886 | 226706935 | 1.2   | 0.38  | 0.42  | 0.45  | 3.57 | 3.38 | 2.51 | -0.07 | 3.06 | 2.26 | 0.0024254359 | 0.0564372399 |
| Nearby Gene: GJC2            |           |           |       |       |       |       |      |      |      |       |      |      |              |              |
| chr1                         | 226406704 | 226406753 | 2.25  | 1.34  | 1.92  | 1.89  | 4.11 | 4.51 | 3.67 | 1.51  | 4.4  | 4.11 | 0.0059194867 | 0.0760236858 |
| chr1                         | 226406829 | 226406878 | 2.12  | 1.25  | 1.72  | 1.41  | 3.36 | 3.57 | 3.06 | 1.32  | 3.58 | 3.61 | 0.0066112750 | 0.0791939228 |
| chr1                         | 226406919 | 226406968 | 2.65  | 1.55  | 2.21  | 2.17  | 4.44 | 4.59 | 3.96 | 1.28  | 4.08 | 4.13 | 0.0114571396 | 0.0984634730 |
| Nearby Gene: PM20D1          |           |           |       |       |       |       |      |      |      |       |      |      |              |              |
| chr1                         | 204085603 | 204085652 | -0.88 | 0.38  | -0.7  | 1.52  | 0.88 | 1.32 | 1.35 | 1.19  | 1.37 | 1.94 | 0.0308053580 | 0.1508980136 |
| chr1                         | 204085683 | 204085732 | -2.06 | 0.28  | -2.12 | 1.38  | 0.41 | 1.31 | 1.37 | 1.04  | 1.87 | 1.78 | 0.0052841880 | 0.0730874803 |
| chr1                         | 204085883 | 204085932 | -1.49 | 0.49  | -1.48 | 1.49  | 0.71 | 1.03 | 1.38 | 1.09  | 1.79 | 1.95 | 0.0332018060 | 0.1562079455 |
| Nearby Gene: PEAR1           |           |           |       |       |       |       |      |      |      |       |      |      |              |              |
| chr1                         | 155150366 | 155150415 | 1.27  | 1.07  | 1.07  | 1.47  | 2.23 | 3.07 | 2.28 | 1.4   | 3.21 | 2.77 | 0.0062223244 | 0.0775930908 |
| chr1                         | 155150471 | 155150520 | 1.56  | 0.88  | 1.2   | 1.27  | 2.85 | 3.28 | 2.35 | 1.22  | 3.38 | 2.72 | 0.0000903933 | 0.0264076198 |
| chr1                         | 155150571 | 155150620 | 1.28  | 0.86  | 1.12  | 1.05  | 2.51 | 2.92 | 2.23 | 1.12  | 3.1  | 2.45 | 0.0038358647 | 0.0653266507 |
| Nearby Gene: SMG5            |           |           |       |       |       |       |      |      |      |       |      |      |              |              |
| chr1                         | 154486638 | 154486687 | 1.25  | 1.18  | 1.13  | -0.28 | 1.44 | 2.01 | 1.87 | 1.48  | 2.59 | 1.94 | 0.0117956978 | 0.0996572570 |
| chr1                         | 154486763 | 154486812 | 1.31  | 1.18  | 1.21  | -0.12 | 2.26 | 2.31 | 2.24 | 1.62  | 3.01 | 2.31 | 0.0035746149 | 0.0638631274 |
| chr1                         | 154486863 | 154486912 | 0.72  | 0.7   | 0.7   | -0.55 | 1.79 | 2.38 | 1.86 | 1.34  | 2.45 | 2.14 | 0.0005105192 | 0.0367458364 |
| Nearby Gene: LOC100131974    |           |           |       |       |       |       |      |      |      |       |      |      |              |              |
| chr1                         | 147599626 | 147599675 | 0.3   | 1.06  | 1.3   | 1.48  | 0.84 | 1.34 | 2.48 | 1.41  | 2.83 | 2.33 | 0.0078575878 | 0.0845543707 |
| chr1                         | 147599691 | 147599740 | 0.12  | 0.63  | 0.92  | 1.2   | 0.99 | 1.69 | 2.52 | 0.99  | 3.56 | 2.73 | 0.0013409318 | 0.0474718099 |
| chr1                         | 147599786 | 147599835 | 0.44  | -0.17 | 0.14  | 0.09  | 0.85 | 1.33 | 2.33 | -0.23 | 2.57 | 1.87 | 0.0023009935 | 0.0555334433 |
| Nearby Gene: WNT2B           |           |           |       |       |       |       |      |      |      |       |      |      |              |              |
| chr1                         | 112853677 | 112853726 | 1.42  | 0.03  | 0.62  | 0.12  | 2.36 | 3.8  | 3.65 | 1.09  | 4.08 | 2.41 | 0.0376206105 | 0.1655391443 |
| chr1                         | 112853782 | 112853831 | 1.28  | 0.07  | 0.61  | 0.28  | 1.38 | 2.83 | 2.7  | 1.35  | 4.04 | 2.06 | 0.0059510566 | 0.0761878250 |
| chr1                         | 112854002 | 112854051 | 0.85  | 0.13  | 0.32  | 0.25  | 0.72 | 2.26 | 2.24 | 1.49  | 3.15 | 1.69 | 0.0287674793 | 0.1464027898 |

---

**Supplementary Table 7. Inherited *DNMT3A* coding variants in AML cases vs. controls.**

---

| Genome coordinate            | rsID       | Variant | Codon | n   | AML patients* |    |    | CEU <sup>#</sup> |    |    | P-value <sup>^</sup> |        |          |
|------------------------------|------------|---------|-------|-----|---------------|----|----|------------------|----|----|----------------------|--------|----------|
|                              |            |         |       |     | AA            | AB | BB | n                | AA | AB | BB                   | Allele | Genotype |
| chr2:25,323,006              | rs2276598  | C>T     | L422  | 166 | 120           | 40 | 6  | 60               | 43 | 15 | 2                    | 0.884  | 0.987    |
| chr2:25,390,331              | rs41284843 | G>A     | P9    | 168 | 122           | 43 | 3  | 60               | 46 | 12 | 2                    | 0.879  | 0.561    |
| chr2:25,324,464              | novel      | G>A     | S267  | 167 | 165           | 2  | 0  | --               | -- | -- | --                   | NA     | NA       |
| chr2:25,324,473              | novel      | G>A     | P264  | 168 | 166           | 2  | 0  | --               | -- | -- | --                   | NA     | NA       |
| chr2:25,324,506 <sup>@</sup> | novel      | G>A     | P253  | 168 | 168           | 0  | 0  | --               | -- | -- | --                   | NA     | NA       |
| chr2:25,390,336              | novel      | C>T     | G8S   | 168 | 167           | 1  | 0  | --               | -- | -- | --                   | NA     | NA       |

---

\*Caucasian only, <sup>#</sup>from 1,000 Genomes (build 130), <sup>@</sup>polymorphic in African American cases only, <sup>^</sup>by Fisher's exact test (allele) or chi-square test (genotype).

---



Supplementary Table 8. Primers used for DNMT3A sequencing.

| Amplicon Name | L Primer Coord | R Primer Coord | L Amp Coord | R Amp Coord | Primer 1 Sequence                           | Primer 2 Sequence                           | Target Name + | Target Start | Target Stop | Build | Gene   | Ensembl TranscriptID | NCBI TranscriptID | Exon# | ExonID          | Exon Start             | Exon Stop              |
|---------------|----------------|----------------|-------------|-------------|---------------------------------------------|---------------------------------------------|---------------|--------------|-------------|-------|--------|----------------------|-------------------|-------|-----------------|------------------------|------------------------|
| 0001788_10W   | 25310553       | 25310780       | 25310578    | 25310757    | TGTA AACGACGGCCAGTCCGAGTCACGTATACTGACGCTCTC | CAGGAAACAGCTATGACCTCTGCTGCTGCTGATGTTCTTGG   | 1788-0        | 25310552     | 25310793    | 36    | DNMT3A | ENST00000264709      | NM_022552.2       | 23    | ENSE00001166323 | 25309350(includes UTR) | 25310793               |
| 0001788_12K   | 25310643       | 25310868       | 25310663    | 25310847    | TGTA AACGACGGCCAGTGGTGGTGGTAGCGGCTCCG       | CAGGAAACAGCTATGACCCOCCATGCTCCATCACACACG     | 1788-0        | 25310652     | 25310793    | 36    | DNMT3A | ENST00000264709      | NM_022552.2       | 23    | ENSE00001166323 | 25309350(includes UTR) | 25310793               |
| 0001788_116   | 25311941       | 25312278       | 25311965    | 25312254    | TGTA AACGACGGCCAGTTGGCATATTTGGTAGCGCATGAC   | CAGGAAACAGCTATGACCTGGGAAATGCTTGATAAACACCCAC | 1788-1        | 25312080     | 25312198    | 36    | DNMT3A | ENST00000264709      | NM_022552.2       | 22    | ENSE00001071017 | 25312080               | 25312198               |
| 0001788_129   | 25312053       | 25312263       | 25312075    | 25312245    | TGTA AACGACGGCCAGTGTAGACGATGACACGATGTTGG    | CAGGAAACAGCTATGACCAAGTGCACGACACACCCG        | 1788-1        | 25312080     | 25312198    | 36    | DNMT3A | ENST00000264709      | NM_022552.2       | 22    | ENSE00001071017 | 25312080               | 25312198               |
| 0001788_14p   | 25313252       | 25313432       | 25313272    | 25313412    | TGTA AACGACGGCCAGTCTCCGCTGTATCCAGG          | CAGGAAACAGCTATGACCCATCTCCGCTTCTCTCC         | 1788-2        | 25313309     | 25313378    | 36    | DNMT3A | ENST00000264709      | NM_022552.2       | 21    | ENSE00001071025 | 25313309               | 25313378               |
| 0001788_13r   | 25315442       | 25315651       | 25315460    | 25315628    | TGTA AACGACGGCCAGTCCGCGGCTGTTCTATCG         | CAGGAAACAGCTATGACCCCACTAGGGTCACTCCACCTCGC   | 1788-3        | 25315503     | 25315588    | 36    | DNMT3A | ENST00000264709      | NM_022552.2       | 20    | ENSE00001071036 | 25315503               | 25315588               |
| 0001788_14b   | 25316597       | 25316933       | 25316618    | 25316911    | TGTA AACGACGGCCAGTGACAGCTATTCCCGATGACCC     | CAGGAAACAGCTATGACCTTCGAGATGAGACAGGATGAAGC   | 1788-4        | 25316675     | 25316823    | 36    | DNMT3A | ENST00000264709      | NM_022552.2       | 19    | ENSE00001071032 | 25316675               | 25316823               |
| H_02_003ms    | 25316866       | 25317164       | 25316887    | 25317142    | TGTA AACGACGGCCAGTATAGACAGATGGTGTGGCTGCTG   | CAGGAAACAGCTATGACCTTCTCTGCTGCTGCTGCTGCTG    | 1788-5        | 25317013     | 25317103    | 36    | DNMT3A | ENST00000264709      | NM_022552.2       | 18    | ENSE00001071021 | 25317013               | 25317103               |
| 0001788_11j   | 25317851       | 25318193       | 25317872    | 25318173    | TGTA AACGACGGCCAGTGTGCTTGGGCTCACAGCTGACC    | CAGGAAACAGCTATGACCAAAATGAAGGAGGACAGGGC      | 1788-6        | 25317935     | 25318080    | 36    | DNMT3A | ENST00000264709      | NM_022552.2       | 17    | ENSE00001071020 | 25317935               | 25318080               |
| 0001788_126   | 25320170       | 25320457       | 25320191    | 25320433    | TGTA AACGACGGCCAGTAGGGTGTGTGGGCTTAGGAGC     | CAGGAAACAGCTATGACCCGCTGGAAGTAACCATCATTTGG   | 1788-7        | 25320271     | 25320355    | 36    | DNMT3A | ENST00000264709      | NM_022552.2       | 16    | ENSE00001281558 | 25320271               | 25320355               |
| 0001788_14i   | 25320431       | 25320788       | 25320453    | 25320767    | TGTA AACGACGGCCAGTTTCCATTCCAGTAGACACACC     | CAGGAAACAGCTATGACCAAGCTCCTAGACCCACACACC     | 1788-8        | 25320528     | 25320711    | 36    | DNMT3A | ENST00000264709      | NM_022552.2       | 15    | ENSE00001281418 | 25320528               | 25320711               |
| 0001788_055   | 25320772       | 25321136       | 25320794    | 25321114    | TGTA AACGACGGCCAGTGGTCAATGTTCTCAGGGCTTAGG   | CAGGAAACAGCTATGACCTGTACCTGGAAATGGAAGACCC    | 1788-9        | 25320913     | 25321025    | 36    | DNMT3A | ENST00000264709      | NM_022552.2       | 14    | ENSE00001071031 | 25320913               | 25321025               |
| 0001788_139   | 25321560       | 25321758       | 25321580    | 25321737    | TGTA AACGACGGCCAGTAGGAGGAGAGCCCTCGGTGG      | CAGGAAACAGCTATGACCAACAGCTAGCCAGAGAGCGCC     | 1788-10       | 25321626     | 25321705    | 36    | DNMT3A | ENST00000264709      | NM_022552.2       | 13    | ENSE00001071029 | 25321626               | 25321705               |
| 0001788_13i   | 25322304       | 25322553       | 25322326    | 25322531    | TGTA AACGACGGCCAGTTATTGATGAGCCACACAGAGG     | CAGGAAACAGCTATGACCTCCATGTGATCAAAACCTCC      | 1788-11       | 25322393     | 25322437    | 36    | DNMT3A | ENST00000264709      | NM_022552.2       | 12    | ENSE00001281442 | 25322393               | 25322437               |
| 0001788_14h   | 25322483       | 25322724       | 25322506    | 25322706    | TGTA AACGACGGCCAGTTTCTGTGACGCTGTAACTGACC    | CAGGAAACAGCTATGACCACTGAGGCTCCTGTGCTG        | 1788-12       | 25322533     | 25322682    | 36    | DNMT3A | ENST00000264709      | NM_022552.2       | 11    | ENSE00001071035 | 25322533               | 25322682               |
| 0001788_12g   | 25322831       | 25323218       | 25322851    | 25323196    | TGTA AACGACGGCCAGTCTTGAGGCTGAGCCATCTGCG     | CAGGAAACAGCTATGACCCGCAAGTCAATCAAGTCTGACC    | 1788-13       | 25322993     | 25323149    | 36    | DNMT3A | ENST00000264709      | NM_022552.2       | 10    | ENSE00001281455 | 25322993               | 25323149               |
| 0001788_138   | 25322981       | 25323230       | 25323003    | 25323208    | TGTA AACGACGGCCAGTCACTACAGATCTGCGCTTAGCC    | CAGGAAACAGCTATGACCCGCTCATTAACCTCTGTGGG      | 1788-13       | 25322993     | 25323149    | 36    | DNMT3A | ENST00000264709      | NM_022552.2       | 10    | ENSE00001281455 | 25322993               | 25323149               |
| 0001788_12s   | 25323352       | 25323579       | 25323374    | 25323559    | TGTA AACGACGGCCAGTGTGCTTGCAGTGTAAAGCTCG     | CAGGAAACAGCTATGACCCCTGCACTCCAACTTCCAGG      | 1788-14       | 25323424     | 25323531    | 36    | DNMT3A | ENST00000264709      | NM_022552.2       | 9     | ENSE00001071033 | 25323424               | 25323531               |
| 0001788_13n   | 25323906       | 25324257       | 25323930    | 25324236    | TGTA AACGACGGCCAGTCTTGCTCAATCAGATGGAGC      | CAGGAAACAGCTATGACCCCTGGATCAGAGACTCTCC       | 1788-15       | 25323964     | 25324122    | 36    | DNMT3A | ENST00000264709      | NM_022552.2       | 8     | ENSE00001281470 | 25323964               | 25324122               |
| 0001788_10e   | 25324321       | 25324672       | 25324345    | 25324649    | TGTA AACGACGGCCAGTCAATTCCTGAGAGGTCAAGGTG    | CAGGAAACAGCTATGACCAAGTGGAGAGGAGGACGAGAC     | 1788-16       | 25324410     | 25324625    | 36    | DNMT3A | ENST00000264709      | NM_022552.2       | 7     | ENSE00001071019 | 25324410               | 25324625               |
| 0001788_13N   | 25325824       | 25326217       | 25325847    | 25326194    | TGTA AACGACGGCCAGTAATCTGGTATGGTGGAAATGGG    | CAGGAAACAGCTATGACCTGGAGTCTTATGATGATCACACC   | 1788-17       | 25326030     | 25326097    | 36    | DNMT3A | ENST00000380746      | NM_153759.2       | 2     | ENSE00001486123 | 25326030               | 25326097               |
| 0001788_06j   | 25326395       | 25326743       | 25326419    | 25326719    | TGTA AACGACGGCCAGTACAAAAGAAATGTTCCCTCCCTCC  | CAGGAAACAGCTATGACCCGCAAGCTAATCAGCATCTCCAG   | 1788-18       | 25326967     | 25326987    | 36    | DNMT3A | ENST00000380746      | NM_153759.2       | 1     | ENSE00001486094 | 25326967               | 25326987               |
| 0001788_11Z   | 25351242       | 25351541       | 25351264    | 25351520    | TGTA AACGACGGCCAGTACATTGTGTTGAGGGGATGGC     | CAGGAAACAGCTATGACCACTGAAGCCATCATCTTCTGG     | 1788-19       | 25351314     | 25351460    | 36    | DNMT3A | ENST00000264709      | NM_022552.2       | 6     | ENSE00000808931 | 25351314               | 25351460               |
| H_02_0038m    | 25351760       | 25352045       | 25351783    | 25352024    | TGTA AACGACGGCCAGTGGATGTGTAAGAAAGGAGGAGGG   | CAGGAAACAGCTATGACCGAAGCAAGTAAACGGCCAGAGG    | 1788-20       | 25351873     | 25351916    | 36    | DNMT3A | ENST00000264709      | NM_022552.2       | 5     | ENSE00001486208 | 25351873               | 25351916               |
| 0001788_11q   | 25358604       | 25358988       | 25358715    | 25358966    | TGTA AACGACGGCCAGTCTGGAGAACCGGAGTGAAGC      | CAGGAAACAGCTATGACCAAGCAGCTTAAAGCCAGCAGC     | 1788-21       | 25358761     | 25359084    | 36    | DNMT3A | ENST00000264709      | NM_022552.2       | 4     | ENSE00001326003 | 25358761               | 25359084               |
| 0001788_11W   | 25359152       | 25359537       | 25359175    | 25359515    | TGTA AACGACGGCCAGTGGCTAAAGCCATGATCTAAAC     | CAGGAAACAGCTATGACCCCTGAGGATGAGGATGCTGCTG    | 1788-21       | 25358761     | 25359084    | 36    | DNMT3A | ENST00000264709      | NM_022552.2       | 4     | ENSE00001326003 | 25358761               | 25359084               |
| 0001788_10P   | 25376634       | 25376677       | 25376655    | 25376655    | TGTA AACGACGGCCAGTCTGGAATCTACACTGCTGGG      | CAGGAAACAGCTATGACCAATACACTGCTGCTGCAAGG      | 1788-22       | 25376512     | 25376616    | 36    | DNMT3A | ENST00000264709      | NM_022552.2       | 3     | ENSE00000808934 | 25376512               | 25376616               |
| 0001788_11m   | 25390235       | 25390433       | 25390259    | 25390415    | TGTA AACGACGGCCAGTCCAAGACACCGATAAATCTCTC    | CAGGAAACAGCTATGACCTCCCTCCAGGCGCCAGA         | 1788-23       | 25390286     | 25390357    | 36    | DNMT3A | ENST00000264709      | NM_022552.2       | 2     | ENSE00001408175 | 25390286               | 25390357(includes UTR) |

The exons highlighted in yellow are from an alternate transcript (ENST00000380746). They are exons 1 and 2 in that transcript (ENST00000380746), but the genomic positions do fall between exons 6 and 7 of the main transcript (ENST00000264709).

Supplementary Table 9. Primers used for DNMT3L sequencing.

| Amplicon Name | L Primer Coord | R Primer Coord | L Amp Coord | R Amp Coord | Primer 1 Sequence                             | Primer 2 Sequence                           | Target Name | + | Target Start | Target Stop | Build | Hugo Name | TranscriptID    | Exon# | ExonID          | Exon_Start              | Exon_Stop | Entrez ID | Chrom |
|---------------|----------------|----------------|-------------|-------------|-----------------------------------------------|---------------------------------------------|-------------|---|--------------|-------------|-------|-----------|-----------------|-------|-----------------|-------------------------|-----------|-----------|-------|
| 0029947_04B   | 44505296       | 44505643       | 44505316    | 44505621    | TGTA AACGACGGCCAGTCATCAGGGATCTGAGCAGG         | CAGGA AACAGCTATGACCTGGTGTGTTAAACGCCCATACC   | 29947-10    |   | 44505465     | 44505570    | 36    | DNMT3L    | ENST00000270172 | 2     | ENSE00000952757 | 44505465                | 44505577  | 29947     | 21    |
| 0029947_04D   | 44505034       | 44505298       | 44505056    | 44505276    | TGTA AACGACGGCCAGTCACCAAGAT AAGGTGTGAGGGC     | CAGGA AACAGCTATGACCCCTGGGATATAGGGTGTGAGCC   | 29947-9     |   | 44505106     | 44505150    | 36    | DNMT3L    | ENST00000270172 | 3     | ENSE00000952758 | 44505106                | 44505150  | 29947     | 21    |
| 0029947_04F   | 44505074       | 44505376       | 44505096    | 44505355    | TGTA AACGACGGCCAGTTTCATCATTTACGAGCC           | CAGGA AACAGCTATGACCTCTGGTGTGGCCAGTATGC      | 29947-9     |   | 44505106     | 44505150    | 36    | DNMT3L    | ENST00000270172 | 3     | ENSE00000952758 | 44505106                | 44505150  | 29947     | 21    |
| 0029947_04C   | 44505074       | 44505296       | 44505096    | 44505276    | TGTA AACGACGGCCAGTCACCAAGAT AAGGTGTGAGGGC     | CAGGA AACAGCTATGACCTCTGGTGTGGCCAGTATGC      | 29947-9     |   | 44505106     | 44505150    | 36    | DNMT3L    | ENST00000270172 | 3     | ENSE00000952758 | 44505106                | 44505150  | 29947     | 21    |
| 0029947_059   | 44503802       | 44504095       | 44503829    | 44504073    | TGTA AACGACGGCCAGTTGGCTAAATTTATTCCTAATCGTCTGC | CAGGA AACAGCTATGACCCGTAGGATTTGGTACCCGTCATCG | 29947-8     |   | 44503943     | 44504022    | 36    | DNMT3L    | ENST00000270172 | 4     | ENSE00000952759 | 44503943                | 44504022  | 29947     | 21    |
| 0029947_057   | 44503740       | 44503947       | 44503762    | 44503928    | TGTA AACGACGGCCAGTCATGTAAGGTAGGAGGGAGGC       | CAGGA AACAGCTATGACCTCACCGGGTCAATCAGG        | 29947-7     |   | 44503748     | 44503860    | 36    | DNMT3L    | ENST00000270172 | 5     | ENSE00000952760 | 44503748                | 44503860  | 29947     | 21    |
| 0029947_059   | 44503802       | 44504095       | 44503829    | 44504073    | TGTA AACGACGGCCAGTTGGCTAAATTTATTCCTAATCGTCTGC | CAGGA AACAGCTATGACCCGTAGGATTTGGTACCCGTCATCG | 29947-7     |   | 44503748     | 44503860    | 36    | DNMT3L    | ENST00000270172 | 5     | ENSE00000952760 | 44503748                | 44503860  | 29947     | 21    |
| 0029947_038   | 44503637       | 44503884       | 44503657    | 44503863    | TGTA AACGACGGCCAGTAGCCTTGCCTTCTCTCTCC         | CAGGA AACAGCTATGACCCAGGAAATCATCATTTGGG      | 29947-7     |   | 44503748     | 44503860    | 36    | DNMT3L    | ENST00000270172 | 5     | ENSE00000952760 | 44503748                | 44503860  | 29947     | 21    |
| 0029947_04Q   | 44502773       | 44503134       | 44502793    | 44503114    | TGTA AACGACGGCCAGTCTGGTCTTCCCAAGGGAGCC        | CAGGA AACAGCTATGACCCAGGAGCCGCTAAGTCAAG      | 29947-6     |   | 44502834     | 44503005    | 36    | DNMT3L    | ENST00000270172 | 6     | ENSE00001288863 | 44502834                | 44503005  | 29947     | 21    |
| 0029947_030   | 44502771       | 44503011       | 44502793    | 44502991    | TGTA AACGACGGCCAGTGGCTAGATGCTAGCTCTCC         | CAGGA AACAGCTATGACCCAGGAGCCGCTAAGTCAAG      | 29947-6     |   | 44502834     | 44503005    | 36    | DNMT3L    | ENST00000270172 | 6     | ENSE00001288863 | 44502834                | 44503005  | 29947     | 21    |
| 0029947_04M   | 44500254       | 44500524       | 44500277    | 44500505    | TGTA AACGACGGCCAGTAACTCAAGGGCTCTGACCCAAG      | CAGGA AACAGCTATGACCCGGACATCAGCAGTTGCCG      | 29947-5     |   | 44500378     | 44500465    | 36    | DNMT3L    | ENST00000270172 | 7     | ENSE00001297260 | 44500378                | 44500465  | 29947     | 21    |
| 0029947_04S   | 44498752       | 44499094       | 44498774    | 44499094    | TGTA AACGACGGCCAGTTGGTATGAGGGTCTCCTGTATGC     | CAGGA AACAGCTATGACCCGCTGACTCCTGTGACAGCCAGG  | 29947-4     |   | 44498928     | 44499016    | 36    | DNMT3L    | ENST00000270172 | 8     | ENSE00001311957 | 44498928                | 44499016  | 29947     | 21    |
| 0029947_05d   | 44498535       | 44498557       | 44498557    | 44498530    | TGTA AACGACGGCCAGTCTAGTGGCTCCACTCTCAAGC       | CAGGA AACAGCTATGACCTGACATTTCCAGTTTCTGCC     | 29947-3     |   | 44498534     | 44498609    | 36    | DNMT3L    | ENST00000270172 | 9     | ENSE00001291091 | 44498534                | 44498609  | 29947     | 21    |
| H_21_00aLz    | 44494985       | 44495378       | 44495007    | 44495357    | TGTA AACGACGGCCAGTGCCTGTACACACCTGGAACCC       | CAGGA AACAGCTATGACCCCTCAGCCCTTCTCTCAAGCC    | 29947-2     |   | 44495121     | 44495260    | 36    | DNMT3L    | ENST00000270172 | 10    | ENSE00000952765 | 44495121                | 44495260  | 29947     | 21    |
| 0029947_03P   | 44493280       | 44493474       | 44493298    | 44493455    | TGTA AACGACGGCCAGTGGGGCTTACCGTCCAGGT          | CAGGA AACAGCTATGACCCGCTTCTGGGCTCATGTT       | 29947-1     |   | 44493337     | 44493422    | 36    | DNMT3L    | ENST00000270172 | 11    | ENSE00000952766 | 44493337                | 44493422  | 29947     | 21    |
| 0029947_03T   | 44490629       | 44490993       | 44490650    | 44490971    | TGTA AACGACGGCCAGTAACTGAGAGGAGCGCTGTTCC       | CAGGA AACAGCTATGACCTCCGAGGAGAAAGAGACAACG    | 29947-0     |   | 44490708     | 44490876    | 36    | DNMT3L    | ENST00000270172 | 12    | ENSE00000952767 | 44490651 (includes UTR) | 44490876  | 29947     | 21    |

Annotation based on Ensembl release 54\_36p.
